# Supplementary material for: Use of Thiazide Diuretics and Risk of All Types of Skin Cancers: An Updated Systematic Review and Meta-Analysis
Source: MDPI journal article supplement (doi:10.3390/cancers14102566), 2022-05-23
Supplement: s1 [file s1]

## **Supplementary Information**

### **Use of Thiazide Diuretics and Risk of All Types of Skin Cancers: An Updated Systematic Review and Meta-Analysis**

Surapon Nochaiwong\*; Mati Chuamanochan\*; Chidchanok Ruengorn; Kajohnsak Noppakun; Ratanaporn Awiphan; Chabaphai Phosuya; Napatra Tovanabuttra; Siri Chiewchanvit; Manish M. Sood; Brian Hutton; Kednapa Thavorn; Greg A. Knoll

#### **\*Correspondence:**

Surapon Nochaiwong, PharmD, Department of Pharmaceutical Care, Faculty of Pharmacy, Chiang Mai University, Chiang Mai 50200, Thailand, Phone: +66-899973365, Fax: 6653222741, Email: [surapon.nochaiwong@cmu.ac.th](mailto:surapon.nochaiwong@cmu.ac.th)

**or**

Mati Chuamanochan, MD, Division of Dermatology, Department of Internal Medicine, Faculty of Medicine, Chiang Mai University, Chiang Mai 50200, Thailand, Phone: +66-53936735-6, Fax: +66-53946234, Email: [mati.c@cmu.ac.th](mailto:mati.c@cmu.ac.th)

## Supplementary Online Content

|                  |                                                                                                    |     |
|------------------|----------------------------------------------------------------------------------------------------|-----|
| <b>Table S1</b>  | Systematic Review Search Strategy                                                                  | S3  |
| <b>Table S2</b>  | The PICOTS Format: Study Inclusion/Exclusion Criteria                                              | S12 |
| <b>Table S3</b>  | Measurement and Definition of Skin Cancer Cases                                                    | S13 |
| <b>Table S4</b>  | Methods of Included Studies in the Meta-Analysis                                                   | S15 |
| <b>Table S5</b>  | Comorbidities and Skin Conditions of Study Participants Included in the Meta-Analysis              | S22 |
| <b>Table S6</b>  | Concomitant Medication Use of Included Studies                                                     | S25 |
| <b>Table S7</b>  | Risk of Bias Assessment of Included Studies                                                        | S28 |
| <b>Table S8</b>  | Subgroup Analysis                                                                                  | S30 |
| <b>Table S9</b>  | Sensitivity Analysis: Restricted the Analysis to the Highest-Quality Study                         | S34 |
| <b>Table S10</b> | Sensitivity Analysis: Excluding Studies that Included Patients Who Underwent Organ Transplantation | S35 |
| <b>Table S11</b> | Sensitivity Analysis: Adding Unpublished Studies                                                   | S36 |
| <b>Table S12</b> | Sensitivity Analysis: Outcomes After Removing Individuals Studies                                  | S37 |
| <b>Table S13</b> | Meta-Regression of Included Studies                                                                | S39 |
| <b>Table S14</b> | Meta-Analysis of Included Studies with Calibration for Publication Bias                            | S41 |
| <b>Table S15</b> | Quality of Evidence Synthesis and GRADE Evidence Profile of Outcomes                               | S42 |
| <b>Figure S1</b> | Study selection flowchart                                                                          | S47 |
| <b>Figure S2</b> | Use of Thiazide Diuretics and the Risk of Lip Cancer                                               | S48 |
| <b>Figure S3</b> | The Funnel Plot of Included Studies in the Meta-Analysis                                           | S49 |
| <b>File S1</b>   | MOOSE statement Checklist                                                                          | S54 |
| <b>File S2</b>   | PRISMA 2020 Statement Checklist                                                                    | S56 |
| <b>File S3</b>   | Pre-specified Protocol and Protocol Amendments                                                     | S58 |
| <b>File S4</b>   | NOS for Assessing the Quality of Non-Randomized Studies                                            | S61 |
| <b>File S5</b>   | Modified Criteria of Evidence Certainty Assessment                                                 | S63 |
| <b>File S6</b>   | List of Excluded Articles                                                                          | S64 |

**Table S1** Systematic Review Search Strategy

| <b>Ovid MEDLINE(R) ALL 1946 to May 7, 2021</b> |                                                                                                                                                                                                                                                                                                                                                                                                                                                          |                    |
|------------------------------------------------|----------------------------------------------------------------------------------------------------------------------------------------------------------------------------------------------------------------------------------------------------------------------------------------------------------------------------------------------------------------------------------------------------------------------------------------------------------|--------------------|
| <b>Search</b>                                  | <b>Query</b>                                                                                                                                                                                                                                                                                                                                                                                                                                             | <b>Items Found</b> |
| #1                                             | exp Diuretics/                                                                                                                                                                                                                                                                                                                                                                                                                                           | 80589              |
| #2                                             | exp Thiazides/                                                                                                                                                                                                                                                                                                                                                                                                                                           | 15511              |
| #3                                             | exp Hydrochlorothiazide/                                                                                                                                                                                                                                                                                                                                                                                                                                 | 6878               |
| #4                                             | exp Sodium Potassium Chloride Symporter Inhibitors/                                                                                                                                                                                                                                                                                                                                                                                                      | 14177              |
| #5                                             | (Thiazide diuretic or Hydrochlorothiazide).mp.                                                                                                                                                                                                                                                                                                                                                                                                           | 9615               |
| #6                                             | (Diuretic or Thiazide* or (Na-K-Cl adj1 inhibit*) or (Sodium potassium chloride adj1 inhibit*)).ti,ab,kf.                                                                                                                                                                                                                                                                                                                                                | 25822              |
| #7                                             | (Bendroflumethiazide or Benzthiazide or Chlorthalidone or Chlorothiazide or Chlorphthalidolone or Chlortalidone or Cyclopenthiazide or Cyclothiazide or Dichlothiazide or Dihydrochlorothiazide or HCTZ or Hydrodiuril or Hydrochlorothiazide or Hydroflumethiazide or Hypothiazide or Indapamide or Methiclothiazide or Methyclothiazide or Metindamide or Metolazone or Oxodoline or Phthalamudine or Quinethazone or Thalitone or Xipamide).ti,ab,kf. | 12081              |
| #8                                             | or/1-7                                                                                                                                                                                                                                                                                                                                                                                                                                                   | 98849              |
| #9                                             | exp Skin Cancer/                                                                                                                                                                                                                                                                                                                                                                                                                                         | 128342             |
| #10                                            | exp Skin Neoplasms/                                                                                                                                                                                                                                                                                                                                                                                                                                      | 128342             |
| #11                                            | exp Melanoma/                                                                                                                                                                                                                                                                                                                                                                                                                                            | 98047              |
| #12                                            | exp Carcinoma, Basal Cell/                                                                                                                                                                                                                                                                                                                                                                                                                               | 18243              |
| #13                                            | exp Nevus, Pigmented/                                                                                                                                                                                                                                                                                                                                                                                                                                    | 9948               |
| #14                                            | exp Keratosis, Actinic/                                                                                                                                                                                                                                                                                                                                                                                                                                  | 2146               |
| #15                                            | exp Precancerous Conditions/                                                                                                                                                                                                                                                                                                                                                                                                                             | 51224              |
| #16                                            | ((skin adj2 neoplasm*) or (skin adj2 cancer*) or (skin adj2 malignan*) or (skin adj2 metas*)).mp.                                                                                                                                                                                                                                                                                                                                                        | 136584             |
| #17                                            | (skin adj3 (cancer* or neoplasm* or tumor or malignan*)).ti,ab,kf.                                                                                                                                                                                                                                                                                                                                                                                       | 37180              |
| #18                                            | ((skin\$ or cutaneous\$ or cutanea\$ or dermis\$ or corium or dermal\$ or dermatolog\$ or epiderm\$ or subcutaneous\$ or sub-cutaneous\$ or hypodermis\$ or (superficial\$ adj2 fascia\$) or subcutis\$ or scalp\$1 or acanthoma\$) adj3 (cancer* or neoplasm* or tumor or malignan*)).ti,ab,kf.                                                                                                                                                         | 54060              |
| #19                                            | (melanoma* or non-melanoma* or nonmelanoma* or NMSC or malignant melanoma or cutaneous melanoma or (squamous adj1 carcinoma) or (squamous\$ adj3 (cell cancer\$ or epithelioma\$)) or (sebaceous cell adj2 carcinoma) or (basal cell adj2 carcinoma) or (pigmented and (lesion* or n? evi)) or mole* or ((actinic or solar or senile) adj keratos*) or keratinocyte cancer* or actinically damaged field or field-canceri\$ed).ti,ab,kf.                 | 2275053            |
| #20                                            | or/9-19                                                                                                                                                                                                                                                                                                                                                                                                                                                  | 2427132            |
| #21                                            | 8 and 20                                                                                                                                                                                                                                                                                                                                                                                                                                                 | 3386               |
| #22                                            | (news or newspaper article or comment or editorial or interview or letter or review or systematic review or case report or case series or cross-sectional).pt.                                                                                                                                                                                                                                                                                           | 5009870            |
| #23                                            | 21 not 22                                                                                                                                                                                                                                                                                                                                                                                                                                                | 2872               |
| #24                                            | exp Clinical Trials as Topic/                                                                                                                                                                                                                                                                                                                                                                                                                            | 356251             |
| #25                                            | (randomi\$ed controlled trial* or controlled clinical trial*).mp.                                                                                                                                                                                                                                                                                                                                                                                        | 126987             |
| #26                                            | (random allocation or double-blind method or single-blind method or clinical trial).mp.                                                                                                                                                                                                                                                                                                                                                                  | 893154             |

|     |                                                                                                                      |         |
|-----|----------------------------------------------------------------------------------------------------------------------|---------|
| #27 | ((controlled clinical trial) or (randomi\$ed controlled trial)).mp. or (clinical trial).pt                           | 563742  |
| #28 | (control* adj2 trial*).tw,kw.                                                                                        | 298539  |
| #29 | ((clinical adj trial*) or (randomly allocated) or (allocated adj2 random*) or randomi\$ed or RCT\$1 placebo*).tw,kw. | 427262  |
| #30 | ((singl* or doubl* or trebl* or tribl*) adj (blind* or mask* or dumm*)).tw,kw.                                       | 178922  |
| #31 | or/24-29                                                                                                             | 1458024 |
| #32 | (nRCT or nRCTs or non-RCT?).tw,kw.                                                                                   | 1054    |
| #33 | (control* adj2 stud\$3).tw,kw.                                                                                       | 245849  |
| #34 | control group/                                                                                                       | 1733    |
| #35 | (control* adj2 group\$1).tw,kw.                                                                                      | 535354  |
| #36 | exp comparative study/                                                                                               | 1888825 |
| #37 | ((comparative or comparison) adj stud\$3).tw,kw.                                                                     | 115182  |
| #38 | exp cohort study/                                                                                                    | 2126118 |
| #39 | (cohort* adj2 stud\$3).tw,kw.                                                                                        | 259051  |
| #40 | exp case control study/                                                                                              | 1166589 |
| #41 | ((case-control* or case-based or case-comparison) adj stud\$3).tw,kw.                                                | 133678  |
| #42 | or/32-41                                                                                                             | 4500775 |
| #43 | 23 and 31                                                                                                            | 105     |
| #44 | 23 and 42                                                                                                            | 348     |
| #45 | 43 or 44                                                                                                             | 425     |
| #46 | exp Adolescent/ not (exp Adult/ and Adolescent/)                                                                     | 625583  |
| #47 | exp Child/ not (exp Adult/ and exp Child/)                                                                           | 1247576 |
| #48 | exp Infant/ not (exp Adult/ and exp Infant/)                                                                         | 851090  |
| #49 | or/46-48                                                                                                             | 1930046 |
| #50 | 45 not 49                                                                                                            | 411     |
| #51 | limit 50 to human                                                                                                    | 209     |

**Table S1** Systematic Review Search Strategy (Continued)

| Ovid Embase 1946 to May 7, 2021 |                                                                                                                                                                                                                                                                                                                                                                                                                                                          |             |
|---------------------------------|----------------------------------------------------------------------------------------------------------------------------------------------------------------------------------------------------------------------------------------------------------------------------------------------------------------------------------------------------------------------------------------------------------------------------------------------------------|-------------|
| Search                          | Query                                                                                                                                                                                                                                                                                                                                                                                                                                                    | Items Found |
| #1                              | exp Diuretics/                                                                                                                                                                                                                                                                                                                                                                                                                                           | 371565      |
| #2                              | exp Thiazides/                                                                                                                                                                                                                                                                                                                                                                                                                                           | 50961       |
| #3                              | exp Hydrochlorothiazide/                                                                                                                                                                                                                                                                                                                                                                                                                                 | 24605       |
| #4                              | exp Sodium Potassium Chloride Symporter Inhibitors/                                                                                                                                                                                                                                                                                                                                                                                                      | 69189       |
| #5                              | (Thiazide diuretic or Hydrochlorothiazide).mp.                                                                                                                                                                                                                                                                                                                                                                                                           | 42642       |
| #6                              | (Diuretic or Thiazide* or (Na-K-Cl adj1 inhibit*) or (Sodium potassium chloride adj1 inhibit*)).ti,ab,kw.                                                                                                                                                                                                                                                                                                                                                | 34060       |
| #7                              | (Bendroflumethiazide or Benzthiazide or Chlorthalidone or Chlorothiazide or Chlorphthalidolone or Chlortalidone or Cyclopenthiazide or Cyclothiazide or Dichlothiazide or Dihydrochlorothiazide or HCTZ or Hydrodiuril or Hydrochlorothiazide or Hydroflumethiazide or Hypothiazide or Indapamide or Methiclothiazide or Methyclothiazide or Metindamide or Metolazone or Oxodoline or Phthalamudine or Quinethazone or Thalitone or Xipamide).ti,ab,kw. | 13612       |
| #8                              | or/1-7                                                                                                                                                                                                                                                                                                                                                                                                                                                   | 381891      |
| #9                              | exp Skin Cancer/                                                                                                                                                                                                                                                                                                                                                                                                                                         | 104388      |
| #10                             | exp Skin Neoplasms/                                                                                                                                                                                                                                                                                                                                                                                                                                      | 182814      |
| #11                             | exp Melanoma/                                                                                                                                                                                                                                                                                                                                                                                                                                            | 163677      |
| #12                             | exp Carcinoma, Basal Cell/                                                                                                                                                                                                                                                                                                                                                                                                                               | 27444       |
| #13                             | exp Nevus, Pigmented/                                                                                                                                                                                                                                                                                                                                                                                                                                    | 8172        |
| #14                             | exp Keratosis, Actinic/                                                                                                                                                                                                                                                                                                                                                                                                                                  | 7367        |
| #15                             | exp Precancerous Conditions/                                                                                                                                                                                                                                                                                                                                                                                                                             | 20588       |
| #16                             | ((skin adj2 neoplasm*) or (skin adj2 cancer*) or (skin adj2 malignan*) or (skin adj2 metas*)).mp.                                                                                                                                                                                                                                                                                                                                                        | 63256       |
| #17                             | (skin adj3 (cancer* or neoplasm* or tumo\$r or malignan*)).ti,ab,kw.                                                                                                                                                                                                                                                                                                                                                                                     | 48704       |
| #18                             | ((skin\$ or cutaneous\$ or cutanea\$ or dermis\$ or corium or dermal\$ or dermatolog\$ or epiderm\$ or subcutaneous\$ or sub-cutaneous\$ or hypodermis\$ or (superficial\$ adj2 fascia\$) or subcutis\$ or scalp\$1 or acanthoma\$) adj3 (cancer* or neoplasm* or tumo\$r or malignan*)).ti,ab,kw.                                                                                                                                                       | 71251       |
| #19                             | (melanoma* or non-melanoma* or nonmelanoma* or NMSC or malignant melanoma or cutaneous melanoma or (squamous adj1 carcinoma) or (squamous\$ adj3 (cell cancer\$ or epithelioma\$)) or (sebaceous cell adj2 carcinoma) or (basal cell adj2 carcinoma) or (pigmented and (lesion* or n? evi)) or mole* or ((actinic or solar or senile) adj keratos*) or keratinocyte cancer* or actinically damaged field or field-canceri\$ed).ti,ab,kw.                 | 2691695     |
| #20                             | or/9-19                                                                                                                                                                                                                                                                                                                                                                                                                                                  | 2880392     |
| #21                             | 8 and 20                                                                                                                                                                                                                                                                                                                                                                                                                                                 | 21554       |
| #22                             | (news or newspaper article or comment or editorial or interview or letter or review or systematic review or case report or case series or cross-sectional).pt.                                                                                                                                                                                                                                                                                           | 4579713     |
| #23                             | 21 not 22                                                                                                                                                                                                                                                                                                                                                                                                                                                | 17556       |
| #24                             | exp Clinical Trials as Topic/                                                                                                                                                                                                                                                                                                                                                                                                                            | 358105      |
| #25                             | (randomi\$ed controlled trial* or controlled clinical trial*).mp.                                                                                                                                                                                                                                                                                                                                                                                        | 507869      |
| #26                             | (random allocation or double-blind method or single-blind method or clinical trial).mp.                                                                                                                                                                                                                                                                                                                                                                  | 1625224     |

|     |                                                                                                                      |         |
|-----|----------------------------------------------------------------------------------------------------------------------|---------|
| #27 | ((controlled clinical trial) or (randomi\$ed controlled trial)).mp. or (clinical trial).pt                           | 495304  |
| #28 | (control* adj2 trial*).tw,kw.                                                                                        | 404257  |
| #29 | ((clinical adj trial*) or (randomly allocated) or (allocated adj2 random*) or randomi\$ed or RCT\$1 placebo*).tw,kw. | 625320  |
| #30 | ((singl* or doubl* or trebl* or tribl*) adj (blind* or mask* or dumm*)).tw,kw.                                       | 245457  |
| #31 | or/24-29                                                                                                             | 2102948 |
| #32 | (nRCT or nRCTs or non-RCT?).tw,kw.                                                                                   | 1467    |
| #33 | (control* adj2 stud\$3).tw,kw.                                                                                       | 331839  |
| #34 | control group/                                                                                                       | 110068  |
| #35 | (control* adj2 group\$1).tw,kw.                                                                                      | 770006  |
| #36 | exp comparative study/                                                                                               | 1400506 |
| #37 | ((comparative or comparison) adj stud\$3).tw,kw.                                                                     | 132168  |
| #38 | exp cohort study/                                                                                                    | 705392  |
| #39 | (cohort* adj2 stud\$3).tw,kw.                                                                                        | 392423  |
| #40 | exp case control study/                                                                                              | 190826  |
| #41 | ((case-control* or case-based or case-comparison) adj stud\$3).tw,kw.                                                | 150276  |
| #42 | or/32-41                                                                                                             | 3182838 |
| #43 | 23 and 31                                                                                                            | 911     |
| #44 | 23 and 42                                                                                                            | 1201    |
| #45 | 43 or 44                                                                                                             | 2003    |
| #46 | exp Adolescent/ not (exp Adult/ and Adolescent/)                                                                     | 576115  |
| #47 | exp Child/ not (exp Adult/ and exp Child/)                                                                           | 1870939 |
| #48 | exp Infant/ not (exp Adult/ and exp Infant/)                                                                         | 757181  |
| #49 | or/46-48                                                                                                             | 2102470 |
| #50 | 45 not 49                                                                                                            | 1960    |
| #51 | limit 50 to human                                                                                                    | 1294    |

**Table S1** Systematic Review Search Strategy (Continued)

| <b>PubMed: From Inception to May 7, 2021</b> |                                                                                                                                                                                                                                                                                                                                                                                                                                                                                                                                                                                                                                                                               |                    |
|----------------------------------------------|-------------------------------------------------------------------------------------------------------------------------------------------------------------------------------------------------------------------------------------------------------------------------------------------------------------------------------------------------------------------------------------------------------------------------------------------------------------------------------------------------------------------------------------------------------------------------------------------------------------------------------------------------------------------------------|--------------------|
| <b>Search</b>                                | <b>Query</b>                                                                                                                                                                                                                                                                                                                                                                                                                                                                                                                                                                                                                                                                  | <b>Items Found</b> |
| #1                                           | Diuretics[Pharmacological Action]                                                                                                                                                                                                                                                                                                                                                                                                                                                                                                                                                                                                                                             | 79912              |
| #2                                           | Diuretics OR Thiazides OR "Sodium Potassium Chloride Symporter Inhibitors" OR "Na K Cl cotransporter inhibitors" OR "Na K Cl symporter inhibitors" OR "Na-K-Cl cotransporter inhibitors" OR "Na-K-Cl symporter inhibitors" OR "Sodium potassium chloride cotransporter inhibitors" OR "Sodium potassium chloride symporter inhibitors"                                                                                                                                                                                                                                                                                                                                        | 108438             |
| #3                                           | Bendroflumethiazide OR Benzthiazide OR Chlorthalidone OR Chlorothiazide OR Chlorphthalidolone OR Chlortalidone OR Cyclopenthiazide OR Cyclothiazide OR Dichlothiazide OR Dihydrochlorothiazide OR HCTZ OR Hydrodiuril OR Hydrochlorothiazide OR Hydroflumethiazide OR Hypothiazide OR Indapamide OR Methiclothiazide OR Methyclothiazide OR Metindamide OR Metolazone OR Oxodoline OR Phthalamudine OR Quinethazone OR Thalitone OR Xipamide                                                                                                                                                                                                                                  | 15736              |
| #4                                           | #1 OR #2 OR #3                                                                                                                                                                                                                                                                                                                                                                                                                                                                                                                                                                                                                                                                | 110424             |
| #5                                           | Skin Cancers[MeSH Terms]                                                                                                                                                                                                                                                                                                                                                                                                                                                                                                                                                                                                                                                      | 128347             |
| #6                                           | (skin[Title/Abstract] OR cutaneous[Title/Abstract] OR dermatology[Title/Abstract] OR dermal[Title/Abstract] OR epidermal[Title/Abstract] OR subcutaneous[Title/Abstract] OR subcutaneous[Title/Abstract] OR hypodermis[Title/Abstract] OR superficial[Title/Abstract]) AND (cancer[Title/Abstract] OR neoplasm[Title/Abstract] OR tumor[Title/Abstract] OR tumour[Title/Abstract] OR malignancy[Title/Abstract] OR metastases[Title/Abstract])                                                                                                                                                                                                                                | 186503             |
| #7                                           | melanoma[Title/Abstract] OR non-melanoma[Title/Abstract] OR nonmelanoma[Title/Abstract] OR NMSC[Title/Abstract] OR "malignant melanoma"[Title/Abstract] OR "cutaneous melanoma"[Title/Abstract] OR "squamous cell carcinoma"[Title/Abstract] OR "sebaceous cell carcinoma"[Title/Abstract] OR "basal cell carcinoma"[Title/Abstract] OR "pigmented nevus" OR moles[Title/Abstract] OR "actinic keratosis"[Title/Abstract] OR "solar keratosis"[Title/Abstract] OR "senile keratosis"[Title/Abstract] OR "keratinocyte cancer"[Title/Abstract] OR "actinically damaged field"[Title/Abstract] OR field-cancerized[Title/Abstract] OR "precancerous conditions"[Title/Abstract] | 231456             |
| #8                                           | #5 OR #6 OR #7                                                                                                                                                                                                                                                                                                                                                                                                                                                                                                                                                                                                                                                                | 434966             |
| #9                                           | #4 AND #8                                                                                                                                                                                                                                                                                                                                                                                                                                                                                                                                                                                                                                                                     | 324                |
| #10                                          | (((((Case Reports[Publication Type]) OR Comment[Publication Type]) OR Editorial[Publication Type]) OR Guideline[Publication Type]) OR Letter[Publication Type]) OR News[Publication Type]) OR Newspaper Article[Publication Type]) OR Review[Publication Type]                                                                                                                                                                                                                                                                                                                                                                                                                | 6780467            |
| #11                                          | #9 NOT #10                                                                                                                                                                                                                                                                                                                                                                                                                                                                                                                                                                                                                                                                    | 208                |
| #12                                          | Filters: Humans                                                                                                                                                                                                                                                                                                                                                                                                                                                                                                                                                                                                                                                               | 139                |

**Table S1** Systematic Review Search Strategy (Continued)

| <b>Cochrane Library: From Inception to May, 2021</b> |                                                                                                                                                                                                                                                                                                                                                                                                                                              |                    |
|------------------------------------------------------|----------------------------------------------------------------------------------------------------------------------------------------------------------------------------------------------------------------------------------------------------------------------------------------------------------------------------------------------------------------------------------------------------------------------------------------------|--------------------|
| <b>Search</b>                                        | <b>Query</b>                                                                                                                                                                                                                                                                                                                                                                                                                                 | <b>Items Found</b> |
| #1                                                   | MeSH descriptor: [Sodium Chloride Symporter Inhibitors] explode all trees                                                                                                                                                                                                                                                                                                                                                                    | 406                |
| #2                                                   | Diuretics OR Thiazides OR "Sodium Potassium Chloride Symporter Inhibitors" OR "Na K Cl cotransporter inhibitors" OR "Na K Cl symporter inhibitors" OR "Na-K-Cl cotransporter inhibitors" OR "Na-K-Cl symporter inhibitors" OR "Sodium potassium chloride cotransporter inhibitors" OR "Sodium potassium chloride symporter inhibitors"                                                                                                       | 6031               |
| #3                                                   | Bendroflumethiazide OR Benzthiazide OR Chlorthalidone OR Chlorothiazide OR Chlorphthalidolone OR Chlortalidone OR Cyclopenthiazide OR Cyclothiazide OR Dichlothiazide OR Dihydrochlorothiazide OR HCTZ OR Hydrodiuril OR Hydrochlorothiazide OR Hydroflumethiazide OR Hypothiazide OR Indapamide OR Methiclothiazide OR Methyclothiazide OR Metindamide OR Metolazone OR Oxodoline OR Phthalamudine OR Quinethazone OR Thalitone OR Xipamide | 5951               |
| #4                                                   | #1 OR #2 OR #3                                                                                                                                                                                                                                                                                                                                                                                                                               | 10465              |
| #5                                                   | MeSH descriptor: [Skin Neoplasms] explode all trees                                                                                                                                                                                                                                                                                                                                                                                          | 1603               |
| #6                                                   | (skin OR cutaneous OR dermatology OR dermal OR epidermal OR subcutaneous OR sub-cutaneous OR hypodermis OR superficial) AND (cancer OR neoplasm OR tumor OR tumour OR malignancy OR metastases)                                                                                                                                                                                                                                              | 21085              |
| #7                                                   | melanoma OR non-melanoma OR nonmelanoma OR NMSC OR "malignant melanoma" OR "cutaneous melanoma" OR "squamous cell carcinoma" OR "sebaceous cell carcinoma" OR "basal cell carcinoma" OR "pigmented nevus" OR moles OR "actinic keratosis" OR "solar keratosis" OR "senile keratosis" OR "keratinocyte cancer" OR "actinically damaged field" OR field-cancerized OR "precancerous conditions"                                                | 13660              |
| #8                                                   | #5 OR #6 OR #7                                                                                                                                                                                                                                                                                                                                                                                                                               | 31116              |
| #9                                                   | #4 AND #8                                                                                                                                                                                                                                                                                                                                                                                                                                    | 62                 |



**Table S1** Systematic Review Search Strategy (Continued)

| <b>Web of Science: From Inception to May 7, 2021</b> |                                                                                                                                                                                                                                                                                                                                                                                                                                                   |                    |
|------------------------------------------------------|---------------------------------------------------------------------------------------------------------------------------------------------------------------------------------------------------------------------------------------------------------------------------------------------------------------------------------------------------------------------------------------------------------------------------------------------------|--------------------|
| <b>Search</b>                                        | <b>Query</b>                                                                                                                                                                                                                                                                                                                                                                                                                                      | <b>Items Found</b> |
| #1                                                   | TS=(Diuretic* OR Thiazide* OR "Sodium Potassium Chloride Symporter Inhibit*" OR "Na K Cl cotransporter inhibit*" OR "Na K Cl symporter inhibit*" OR "Na-K-Cl cotransporter inhibit*" OR "Na-K-Cl symporter inhibit*" OR "Sodium potassium chloride cotransporter inhibit*" OR "Sodium potassium chloride symporter inhibit*")                                                                                                                     | 20885              |
| #2                                                   | TS=(Bendroflumethiazide OR Benzthiazide OR Chlorthalidone OR Chlorothiazide OR Chlorphthalidolone OR Chlortalidone OR Cyclopenthiazide OR Cyclothiazide OR Dichlothiazide OR Dihydrochlorothiazide OR HCTZ OR Hydrodiuril OR Hydrochlorothiazide OR Hydroflumethiazide OR Hypothiazide OR Indapamide OR Methiclothiazide OR Methyclothiazide OR Metindamide OR Metolazone OR Oxodoline OR Phthalamudine OR Quinethazone OR Thalitone OR Xipamide) | 6731               |
| #3                                                   | #1 OR #2                                                                                                                                                                                                                                                                                                                                                                                                                                          | 25638              |
| #4                                                   | TS=((skin OR cutaneous OR dermatology OR dermal OR epidermal OR subcutaneous OR sub-cutaneous OR hypodermis OR superficial) AND (cancer OR neoplasm OR tumor OR tumour OR malignancy OR metastases))                                                                                                                                                                                                                                              | 187898             |
| #5                                                   | TS=(melanoma OR non-melanoma OR nonmelanoma OR NMSC OR "malignant melanoma" OR "cutaneous melanoma" OR "squamous cell carcinoma" OR "sebaceous cell carcinoma" OR "basal cell carcinoma" OR "pigmented nevus" OR moles OR "actinic keratosis" OR "solar keratosis" OR "senile keratosis" OR "keratinocyte cancer" OR "actinically damaged field" OR field-cancerized OR "precancerous conditions")                                                | 278412             |
| #6                                                   | #4 OR #5                                                                                                                                                                                                                                                                                                                                                                                                                                          | 420955             |
| #7                                                   | #3 AND #6                                                                                                                                                                                                                                                                                                                                                                                                                                         | 216                |
| #8                                                   | Refined by: DOCUMENT TYPES: (ARTICLE OR MEETING ABSTRACT OR EARLY ACCESS OR PROCEEDINGS PAPER)<br>Timespan: All years.                                                                                                                                                                                                                                                                                                                            | 143                |

**Table S1** Systematic Review Search Strategy (Continued)

| Scopus: From Inception to May 7, 2021 |                                                                                                                                                                                                                                                                                                                                                                                                                                                              |             |
|---------------------------------------|--------------------------------------------------------------------------------------------------------------------------------------------------------------------------------------------------------------------------------------------------------------------------------------------------------------------------------------------------------------------------------------------------------------------------------------------------------------|-------------|
| Search                                | Query                                                                                                                                                                                                                                                                                                                                                                                                                                                        | Items Found |
| #1                                    | TITLE-ABS-KEY ( diuretic* OR thiazide* OR "Sodium Potassium Chloride Symporter Inhibit*" OR "Na K Cl cotransporter inhibit*" OR "Na K Cl symporter inhibit*" OR "Na-K-Cl cotransporter inhibit*" OR "Na-K-Cl symporter inhibit*" OR "Sodium potassium chloride cotransporter inhibit*" OR "Sodium potassium chloride symporter inhibit*" )                                                                                                                   | 127983      |
| #2                                    | TITLE-ABS-KEY ( bendroflumethiazide OR benzthiazide OR chlorthalidone OR chlorothiazide OR chlorthalidolone OR chlortalidone OR cyclopenthiazide OR cyclothiazide OR dichlothiazide OR dihydrochlorothiazide OR hctz OR hydrodiuril OR hydrochlorothiazide OR hydroflumethiazide OR hypothiazide OR indapamide OR methiclothiazide OR methyclothiazide OR metindamide OR metolazone OR oxodoline OR phthalamudine OR quinethazone OR thalitone OR xipamide ) | 46808       |
| #3                                    | #1 OR #2                                                                                                                                                                                                                                                                                                                                                                                                                                                     | 156490      |
| #4                                    | TITLE-ABS-KEY ( ( skin OR cutaneous OR dermatology OR dermal OR epidermal OR subcutaneous OR sub-cutaneous OR hypodermis OR superficial ) AND ( cancer OR neoplasm OR tumor OR tumour OR malignancy OR metastases ) )                                                                                                                                                                                                                                        | 516283      |
| #5                                    | TITLE-ABS-KEY ( melanoma OR non-melanoma OR nonmelanoma OR nmsc OR "malignant melanoma" OR "cutaneous melanoma" OR "squamous cell carcinoma" OR "sebaceous cell carcinoma" OR "basal cell carcinoma" OR "pigmented nevus" OR moles OR "actinic keratosis" OR "solar keratosis" OR "senile keratosis" OR "keratinocyte cancer" OR "actinically damaged field" OR field-cancerized OR "precancerous conditions" )                                              | 521973      |
| #6                                    | #4 OR #5                                                                                                                                                                                                                                                                                                                                                                                                                                                     | 916367      |
| #7                                    | #3 AND #6                                                                                                                                                                                                                                                                                                                                                                                                                                                    | 1587        |
| #8                                    | LIMIT-TO ( PUBSTAGE , "final" ) OR LIMIT-TO ( PUBSTAGE , "aip" ) ) AND ( LIMIT-TO ( DOCTYPE , "ar" ) ) AND ( LIMIT-TO ( SRCTYPE , "j" ) )                                                                                                                                                                                                                                                                                                                    | 944         |

**Table S1** Systematic Review Search Strategy (Continued)

| <b>CINAHL: From Inception to May 7, 2021</b> |                                                                                                                                                                                                                                                                                                                                                                                                                                                 |                    |
|----------------------------------------------|-------------------------------------------------------------------------------------------------------------------------------------------------------------------------------------------------------------------------------------------------------------------------------------------------------------------------------------------------------------------------------------------------------------------------------------------------|--------------------|
| <b>Search</b>                                | <b>Query</b>                                                                                                                                                                                                                                                                                                                                                                                                                                    | <b>Items Found</b> |
| #1                                           | AB diuretic* OR thiazide* OR "Sodium Potassium Chloride Symporter Inhibit*" OR "Na K Cl cotransporter inhibit*" OR "Na K Cl symporter inhibit*" OR "Na-K-Cl cotransporter inhibit*" OR "Na-K-Cl symporter inhibit*" OR "Sodium potassium chloride cotransporter inhibit*" OR "Sodium potassium chloride symporter inhibit*"                                                                                                                     | 6149               |
| #2                                           | AB bendroflumethiazide OR benzthiazide OR chlorthalidone OR chlorothiazide OR chlorphthalidolone OR chlortalidone OR cyclopenthiazide OR cyclothiazide OR dichlothiazide OR dihydrochlorothiazide OR hctz OR hydrodiuril OR hydrochlorothiazide OR hydroflumethiazide OR hypothiazide OR indapamide OR methiclothiazide OR methyclothiazide OR metindamide OR metolazone OR oxodoline OR phthalamudine OR quinethazone OR thalitone OR xipamide | 2395               |
| #3                                           | S1 OR S2                                                                                                                                                                                                                                                                                                                                                                                                                                        | 7864               |
| #4                                           | AB ( skin OR cutaneous OR dermatology OR dermal OR epidermal OR subcutaneous OR sub-cutaneous OR hypodermis OR superficial ) AND ( cancer OR neoplasm OR tumor OR tumour OR malignancy OR metastases )                                                                                                                                                                                                                                          | 27799              |
| #5                                           | AB melanoma OR non-melanoma OR nonmelanoma OR nmesc OR "malignant melanoma" OR "cutaneous melanoma" OR "squamous cell carcinoma" OR "sebaceous cell carcinoma" OR "basal cell carcinoma" OR "pigmented nevus" OR moles OR "actinic keratosis" OR "solar keratosis" OR "senile keratosis" OR "keratinocyte cancer" OR "actinically damaged field" OR field-cancerized OR "precancerous conditions"                                               | 46054              |
| #6                                           | S4 OR S5                                                                                                                                                                                                                                                                                                                                                                                                                                        | 67760              |
| #7                                           | S3 AND S6                                                                                                                                                                                                                                                                                                                                                                                                                                       | 53                 |

**Table S2** The PICOTS Format: Study Inclusion/Exclusion Criteria

| Study Elements | Criteria for Inclusion                                                                                                                                                                                                                                                                                                                                                                                      | Criteria for Exclusion                                                                                                                                                                                                                                                                                                                            |
|----------------|-------------------------------------------------------------------------------------------------------------------------------------------------------------------------------------------------------------------------------------------------------------------------------------------------------------------------------------------------------------------------------------------------------------|---------------------------------------------------------------------------------------------------------------------------------------------------------------------------------------------------------------------------------------------------------------------------------------------------------------------------------------------------|
| Populations    | <ul style="list-style-type: none"> <li>• Adult or adolescent participants aged 12 years or older which addressed at least one of the outcome of interest</li> <li>• Other subgroups analysis were included if studies providing data to calculate the effect estimates of the outcome of interest</li> </ul>                                                                                                | <ul style="list-style-type: none"> <li>• In vitro or animal studies</li> <li>• Studies including less than 50 participants were excluded owing to they lacked statistically significant power</li> </ul>                                                                                                                                          |
| Interventions  | <ul style="list-style-type: none"> <li>• Thiazide diuretics therapy for any indications</li> </ul>                                                                                                                                                                                                                                                                                                          | <ul style="list-style-type: none"> <li>• Unclear definition of thiazide diuretics exposure</li> </ul>                                                                                                                                                                                                                                             |
| Comparators    | <ul style="list-style-type: none"> <li>• Non-thiazide-users or active comparators</li> </ul>                                                                                                                                                                                                                                                                                                                | <ul style="list-style-type: none"> <li>• Studies without control groups</li> </ul>                                                                                                                                                                                                                                                                |
| Outcomes       | <ul style="list-style-type: none"> <li>• Primary outcomes <ul style="list-style-type: none"> <li>❖ Malignant melanoma</li> <li>❖ NMSC: BCC and SCC</li> </ul> </li> <li>• Secondary outcomes <ul style="list-style-type: none"> <li>❖ Lip cancer</li> <li>❖ Merkel cell carcinoma</li> <li>❖ Actinic keratosis</li> <li>❖ Malignant adnexal skin tumor</li> <li>❖ Oral cavity cancer</li> </ul> </li> </ul> | <ul style="list-style-type: none"> <li>• Studies not providing data to calculate the effect estimates of the outcome of interest</li> <li>• Inadequate control of confounders/unadjusted effect estimates</li> </ul>                                                                                                                              |
| Timing         | <ul style="list-style-type: none"> <li>• An extensive search strategy from the inception of bibliographic databases forward to assure all published literature was identified</li> </ul>                                                                                                                                                                                                                    | <ul style="list-style-type: none"> <li>• No limit timing of start date</li> </ul>                                                                                                                                                                                                                                                                 |
| Setting        | <ul style="list-style-type: none"> <li>• Observational nonrandomized trials (cohort studies and case-control studies) with no language restriction</li> </ul>                                                                                                                                                                                                                                               | <ul style="list-style-type: none"> <li>• N-of-one, cross-sectional, case series/case reports, pharmacokinetic/pharmacodynamics study, and RCTs design</li> <li>• Reports not involving primary data including, narrative review, systematic review, meta-analysis, news items, consensus statement, guidelines, and opinion/editorials</li> </ul> |

Abbreviations: BCC, basal cell carcinoma; NA, not applicable; NMSC, non-melanoma skin cancer; PICOTS, populations, interventions, comparators, outcomes, timing, setting; RCTs, randomized controlled trial; SCC, squamous cell carcinoma.

**Table S3** Measurement and Definition of Skin Cancer Cases

| First Author, Year                   | Outcomes Measurement                                                   | Definition of Skin Cancer Cases                                                                                                                                                                                                                                                            |
|--------------------------------------|------------------------------------------------------------------------|--------------------------------------------------------------------------------------------------------------------------------------------------------------------------------------------------------------------------------------------------------------------------------------------|
| Westerdahl et al <sup>1</sup> , 1996 | Cancer registry data                                                   | First histopathological diagnosis of malignant melanoma                                                                                                                                                                                                                                    |
| Jensen et al <sup>2</sup> , 2008     | EHRs linked with cancer registry data                                  | First primary diagnosis of BCC, SCC or malignant melanoma: BCC (ICD-7 codes 1910-1919; ICD-O-1 codes 80903, 80913, 80923, 80933 and 81233), SCC (ICD-7 codes 1910-1919; ICD-O-1 codes 80513, 80703, 80713, 80743, 80763, 80943, and 80953), and malignant melanoma (ICD-7 codes 1900-1909) |
| Kaae et al <sup>3</sup> , 2010       | EHRs linked with cancer registry data                                  | ICD-10 codes C43 and C44 (1995 to 2006); WHO histology codes: BCC (C44, histology codes 80903-80933), SCC (C44, histology codes 80513-80523, 80703-80763, 80943, or 85603), MCC (C44, histology code 82473), malignant melanoma (C43)                                                      |
| Ruiter et al <sup>4</sup> , 2010     | Prospective registries data                                            | Diagnosis of BCC using ICD-10, including histo- and cytopathology (two research physicians independently assessed the first date and diagnosis)                                                                                                                                            |
| de Vries et al <sup>5</sup> , 2012   | Medical record: hospital-based data                                    | Histological confirmation and a maximum of 3 months since diagnosis was required                                                                                                                                                                                                           |
| Friedman et al <sup>6</sup> , 2012   | EHRs linked with cancer registry data                                  | Based on SEER program                                                                                                                                                                                                                                                                      |
| Traianou et al <sup>7</sup> , 2012   | Medical record: hospital-based data                                    | Histological confirmation and a maximum of 3 months since diagnosis was required                                                                                                                                                                                                           |
| Robinson et al <sup>8</sup> , 2013   | Medical record along with the New Hampshire Skin Cancer Study          | Histological confirmation of SCC                                                                                                                                                                                                                                                           |
| Schmidt et al <sup>9</sup> , 2015    | EHRs linked with cancer registry data                                  | Based on ICD-O-3 and ICD-10                                                                                                                                                                                                                                                                |
| Nardone et al <sup>10</sup> , 2017   | EHRs link with pathology data from the hospital                        | Primary diagnosis of BCC, SCC or malignant melanoma using ICD-9: BCC (codes 171.01-173.91), SCC (codes 173.02-179.92), malignant melanoma (172.0-172.9)                                                                                                                                    |
| Pottegård et al <sup>11</sup> , 2017 | EHRs linked with cancer registry data                                  | Biopsy-verified first diagnosis of SCC of the lip                                                                                                                                                                                                                                          |
| Pedersen et al <sup>12</sup> , 2018  | EHRs linked with cancer registry data                                  | First diagnosis of BCC or SCC of the skin                                                                                                                                                                                                                                                  |
| Pottegård et al <sup>13</sup> , 2018 | EHRs linked with cancer registry data                                  | Histologically verified malignant melanoma cases                                                                                                                                                                                                                                           |
| Shaw et al <sup>14</sup> , 2018      | Along with the VAKCC trial                                             | Histopathological confirmed of SCC                                                                                                                                                                                                                                                         |
| Su et al <sup>15</sup> , 2018        | EHRs: KPNC                                                             | Biopsy-proven SCC                                                                                                                                                                                                                                                                          |
| Pedersen et al <sup>16</sup> , 2019  | EHRs linked with cancer registry data                                  | Histologically verified primary diagnosis of MCC or malignant adnexal skin tumor                                                                                                                                                                                                           |
| Pottegård et al <sup>17</sup> , 2019 | EHRs: NHIRD                                                            | First ever diagnosis using ICD-9 code: NMSC of the lip (code 1730), non-lip NMSC (codes 1731-1739), malignant melanoma (codes 1720-1729)                                                                                                                                                   |
| Daniels et al <sup>18</sup> , 2020   | EHRs linked with cancer registry data                                  | Histologically confirmed diagnosis of lip cancer or malignant melanoma                                                                                                                                                                                                                     |
| Lee et al <sup>19</sup> , 2020       | EHRs linked with 3 hospital-based centers in Korean                    | KCD-8 codes, which are similar to ICD-10 codes: NMSC (C44, D04), malignant melanoma (C43, D03)                                                                                                                                                                                             |
| Letellier et al <sup>20</sup> , 2020 | EHRs linked with prospective DIVAT cohort of patients with transplants | Histologically confirmed keratinocyte cancers (NMSC)                                                                                                                                                                                                                                       |

Abbreviations: BCC, basal cell carcinoma; DIVAT, Données Informatisées et Validées en Transplantation; EHRs, electronic health records; ICD, International Classification of Diseases; ICD-O, International Classification of Diseases for Oncology; KCD, Korean Classification of Disease; KPNC, Kaiser Permanente Northern California; MCC, Merkel cell carcinoma; NHIRD, National Health Insurance Research Database; NMSC, non-melanoma skin cancer; SCC, squamous cell carcinoma; SEER, Surveillance, Epidemiology, and End Results; VAKCC, Veterans Affairs Keratinocyte Carcinoma Chemoprevention; WHO, World Health Organization.

**Table S3** Measurement and Definition of Skin Cancer Cases (Continued)

| First Author, Year                                  | Outcomes Measurement                                                   | Definition of Skin Cancer Cases                                                                                                                                                                                                      |
|-----------------------------------------------------|------------------------------------------------------------------------|--------------------------------------------------------------------------------------------------------------------------------------------------------------------------------------------------------------------------------------|
| Morales et al <sup>21</sup> , 2020                  | EHRs: THIN                                                             | Using the Read Code clinical classification system, a hierarchical classification system, linked to the ICD                                                                                                                          |
| Park et al <sup>22</sup> , 2020                     | EHRs: HIRA                                                             | Diagnosis is confirmed by pathologic examination: KCD-8 codes, which are similar to ICD-10 codes: NMSC (C44, D04); malignant melanoma (C43, D03)                                                                                     |
| Yeon et al <sup>23</sup> , 2020                     | EHRs: KNHI                                                             | ICD-10 code C44 for NMSC                                                                                                                                                                                                             |
| Adalsteinsson et al <sup>24</sup> , 2021            | EHRs linked with cancer registry data                                  | All cases of skin cancer diagnosed with histologic verification                                                                                                                                                                      |
| de Haan-Du et al <sup>25</sup> , 2021               | EHRs linked with cancer registry data                                  | Using the Dutch Pathology Network based on histologic, cytologic, and autopsy reports submitted by pathology departments                                                                                                             |
| Drucker et al <sup>26</sup> , 2021                  | EHRs linked with administrative health data from Ontario, Canada       | BCC and SCC: using a validated OHIP claims-based algorithm (sensitivity 83%-85%, specificity 93%-99%); malignant melanoma: using the Ontario Cancer Registry, captures 94% of melanomas diagnosed in Ontario (ICD-O codes C440-C449) |
| Eworuke et al <sup>27</sup> , 2021                  | EHRs: US FDA Sentinel System with a PPV of 98.7% for outcome algorithm | BCC (ICD-9 codes 173.x1 or ICD-10 codes C44.x1x), SCC (ICD-9 codes 173.x2 or ICD-10 codes C44.x2x)                                                                                                                                   |
| Habel et al <sup>28</sup> , 2021                    | EHRs: KPNC                                                             | Histologic diagnosis based on cancer registry, including pathology reports                                                                                                                                                           |
| Kim et al <sup>29</sup> , 2021                      | EHRs: KNHI                                                             | Diagnosis of NMSC was based on the ICD-10 (codes C44, D04)                                                                                                                                                                           |
| León-Muñoz et al <sup>30</sup> , SIDIAP cohort 2021 | EHRs: SIDIAP—routine visits in primary care                            | Malignant melanoma (ICPC-2, ICD-9, ICD-10); NMSC (ICPC-2, ICD-9, ICD-10); unspecified skin cancer (ICPC-2, ICD-9), ICD-10)                                                                                                           |
| León-Muñoz et al <sup>30</sup> , BIFAP cohort 2021  | EHRs: BIFAP—routine visits in primary care                             | Malignant melanoma (ICPC-2, ICD-9, ICD-10); NMSC (ICPC-2, ICD-9, ICD-10); BCC (ICPC-2, ICD-9, ICD-10), SCC (ICPC-2, ICD-9, ICD-10); unspecified skin cancer (ICPC-2, ICD-9), ICD-10)                                                 |
| Rouette et al <sup>31</sup> , 2021                  | EHRs using CPRD Gold linked with National Cancer Registry              | Read codes: BCC (PPV=93%), SCC (PPV=83%), and malignant melanoma (PPV=85%)                                                                                                                                                           |
| Schneider et al <sup>32</sup> , 2021                | EHRs using CPRD Gold and HES APC data                                  | Frist time diagnosis of skin cancers using Read codes: BCC or SCC (PPV=85%), malignant melanoma (PPV=93%)                                                                                                                            |

Abbreviations: BCC, basal cell carcinoma; BIFAP, Base de Datos para la Investigación Farmacoepidemiológica en Atención Primaria; CPRD, Clinical Practice Research Datalink; EHRs, electronic health records; HES APC, Hospital Episode Statistics Admitted Patient Care; HIRA, Health Insurance Review and Assessment Service; ICD, International Classification of Diseases; ICD-O, International Classification of Diseases for Oncology; ICPC-2, International Classification of Primary Care; KCD, Korean Classification of Disease; KNHI, Korean National Health Insurance; KPNC, Kaiser Permanente Northern California; NMSC, non-melanoma skin cancer; NR, not reported; OHIP, Ontario Health Insurance Plan; PPV, positive predictive value; SCC, squamous cell carcinoma; SIDIAP, Spain: Information System for Research in Primary Care; THIN, The Health Improvement Network; US FDA, United States Food and Drug Administration.

**Table S4** Methods of Included Studies in the Meta-Analysis

| Author, Year                         | Population/Case Patients                                                                                         | Definition of Exposure                                                                                                                      | Definition of Non-exposure                                                                                                                                                                                                              | Statistical Methods for Data Analysis                    | Factors Controlled for in Analysis                                                                                                                                                        |
|--------------------------------------|------------------------------------------------------------------------------------------------------------------|---------------------------------------------------------------------------------------------------------------------------------------------|-----------------------------------------------------------------------------------------------------------------------------------------------------------------------------------------------------------------------------------------|----------------------------------------------------------|-------------------------------------------------------------------------------------------------------------------------------------------------------------------------------------------|
| Westerdahl et al <sup>1</sup> , 1996 | Participants in the South Swedish Health Care Region                                                             | Self-reported: used prescribed thiazide diuretics >1 month continuously                                                                     | Control: up to 2 controls using a random sampling and matched by sex, age (within a year), and parish                                                                                                                                   | Multivariable conditional logistic regression models     | Matching variables (age, sex, and parish), history of sunburns and host factors (hair color, number of raised naevi)                                                                      |
| Jensen et al <sup>2</sup> , 2008     | Adult Danish residents in North Jutland Country                                                                  | Thiazide/Thiazide-like-users (bendroflumethiazide, indapamide, HCTZ): any prescriptions filled, >1 years and >5 years before the index date | Control: up to 4 controls matched by exact age, sex, and area of residence based on risk set sampling                                                                                                                                   | Multivariable conditional logistic regression models     | Matching variables (age, sex, and area of residence), prior hospitalization for selected chronic diseases and use of glucocorticoids                                                      |
| Kaae et al <sup>3</sup> , 2010       | All Danish residents                                                                                             | Bendroflumethiazide users: filled at least 1 prescription                                                                                   | Non-photosensitizing medication users                                                                                                                                                                                                   | Multivariable Poisson regression models                  | Age, period, sex, and education                                                                                                                                                           |
| Ruiter et al <sup>4</sup> , 2010     | Rotterdam study cohort: mainly Caucasians                                                                        | Thiazides user (chlorthalidone and thiazides in combination with other drugs): prescriptions during the study period                        | Non-thiazides-users (NS)                                                                                                                                                                                                                | Multivariable Cox proportional hazards regression models | Age at baseline and gender                                                                                                                                                                |
| de Vries et al <sup>5</sup> , 2012   | Hospital-based adult European populations in Finland, Germany, Greece, Italy, Malta, Poland, Scotland, and Spain | Self-reported: used prescribed thiazide diuretics (bendroflumethiazide) ≥3 months of regular (daily)                                        | Control: frequency-match for age (in 5-year age bands) and sex in each country (visiting the hospital clinics for any condition unrelated to skin cancer); 2 controls per malignant melanoma and 1 control per non-melanoma skin cancer | Multivariable unconditional logistic regression models   | Age, sex, Fitzpatrick skin type (or phototype), and country                                                                                                                               |
| Friedman et al <sup>6</sup> , 2012   | Adult non-Hispanic whites in the San Francisco Bay area and central valley of California                         | HCTZ-users, defined as 3 or more filled prescriptions                                                                                       | Control: up to 50 risk-set controls and matched on age, sex, and year of entry into the cohort                                                                                                                                          | Multivariable conditional logistic regression models     | Matching variables (age, sex, and year of entry into the cohort) and smoking habits                                                                                                       |
| Traianou et al <sup>7</sup> , 2012   | Hospital-based adult European populations in Finland, Germany, Greece, Italy, Malta, Poland, Scotland, and Spain | Self-reported: used prescribed thiazide diuretics ≥3 months of regular (daily)                                                              | Control: frequency matched for age and sex (cases to controls ratio was 1:2)                                                                                                                                                            | Multivariable unconditional logistic regression models   | Age, sex, and country                                                                                                                                                                     |
| Robinson et al <sup>8</sup> , 2013   | Adult residents of New Hampshire, speak English                                                                  | Self-reported: used prescribed thiazides (HCTZ, including combination medication) ≥6 months of regular (at least 4 times/week)              | Control: frequency matched for age and sex                                                                                                                                                                                              | Multivariable logistic regression models                 | Matching variables (age and sex), number of painful sunburns, study phase, lifetime hours of warm months sun exposure, skin response to first hour of sun in summer, and tanning lamp use |

Abbreviations: HCTZ, hydrochlorothiazide; NS, not specified.

**Table S4** Methods of Included Studies in the Meta-Analysis (Continued)

| Author, Year                         | Population/Case Patients                                                                    | Definition of Exposure                                                                                                              | Definition of Non-exposure                                                                                                                                                | Statistical Methods for Data Analysis                | Factors Controlled for in Analysis                                                                                                                                                                                                                                                                               |
|--------------------------------------|---------------------------------------------------------------------------------------------|-------------------------------------------------------------------------------------------------------------------------------------|---------------------------------------------------------------------------------------------------------------------------------------------------------------------------|------------------------------------------------------|------------------------------------------------------------------------------------------------------------------------------------------------------------------------------------------------------------------------------------------------------------------------------------------------------------------|
| Schmidt et al <sup>9</sup> , 2015    | Adult Danish residents in northern Denmark                                                  | Thiazides users (bendroflumethiazide, hydroflumethiazide, HCTZ, chlorothiazide): had redeemed >2 prescription before the index date | Control: up to 10 controls using a risk-set sampling and matched by birth year, sex, and country of residence                                                             | Multivariable conditional logistic regression models | Matching variables (birth year, sex, and country of residence), CCI, obesity, medication use (glucocorticoids, aspirin, NSAIDs, statins)                                                                                                                                                                         |
| Nardone et al <sup>10</sup> , 2017   | All adult persons receiving treatment through Northwestern University healthcare affiliates | Thiazide-users, who had one or more written orders for thiazide diuretics                                                           | Non-thiazides-users (no documented any antihypertensive drug): randomly selected 3:1 ratio and matched by time to follow-up ( $\pm 3$ months) and by age ( $\pm 5$ years) | Multivariable logistic regression models             | Age, gender, race, and CCI                                                                                                                                                                                                                                                                                       |
| Pottegård et al <sup>11</sup> , 2017 | Adult Danish residents                                                                      | HCTZ-users, filled at least 1 prescription for a HCTZ-containing drug prior to the index date                                       | Control: up to 100 controls using a risk-set sampling strategy and matched by age, gender, and calendar time                                                              | Multivariable conditional logistic regression models | Matching variables (age, gender, and calendar time), history of heavy alcohol consumption, diabetes, COPD, history of non-melanoma skin cancer, CCI, highest achieved education, and medication use (photosensitizing drugs, aspirin, NSAIDs, statins)                                                           |
| Pedersen et al <sup>12</sup> , 2018  | Adult Danish residents                                                                      | HCTZ-users, filled at least 1 prescription for a HCTZ-containing drug prior to the index date                                       | Control: up to 20 controls using a risk-set sampling strategy and matched by age, sex and calendar time                                                                   | Multivariable conditional logistic regression models | Matching variables (age, gender, and calendar time), history of heavy alcohol consumption, diabetes, chronic renal insufficiency, COPD, CCI, highest achieved education, and medication use (photosensitizing drugs, aspirin, NSAIDs, statins)                                                                   |
| Pottegård et al <sup>13</sup> , 2018 | Adult Danish residents                                                                      | HCTZ-users, filled at least 1 prescription for a HCTZ-containing drug prior to the index date                                       | Control: matched 1:10 using a risk-set sampling strategy by age, sex and calendar time                                                                                    | Multivariable conditional logistic regression models | Matching variables (age, gender, and calendar time), history of non-melanoma skin cancer, comorbidity (diabetes, COPD, alcohol abuse-associated disorders, chronic renal insufficiency), CCI, highest achieved education, and medication use (photosensitizing drugs, aspirin, NSAIDs, statins or oral steroids) |

Abbreviations: CCI, Charlson Comorbidity Index; COPD, Chronic obstructive pulmonary disease; HCTZ, hydrochlorothiazide; NSAIDs, non-steroidal anti-inflammatory drugs.



**Table S4** Methods of Included Studies in the Meta-Analysis (Continued)

| Author, Year                         | Population/Case Patients                                                                                                             | Definition of Exposure                                                                       | Definition of Non-exposure                                                                                                                                               | Statistical Methods for Data Analysis                    | Factors Controlled for in Analysis                                                                                                                                                                                                                                               |
|--------------------------------------|--------------------------------------------------------------------------------------------------------------------------------------|----------------------------------------------------------------------------------------------|--------------------------------------------------------------------------------------------------------------------------------------------------------------------------|----------------------------------------------------------|----------------------------------------------------------------------------------------------------------------------------------------------------------------------------------------------------------------------------------------------------------------------------------|
| Shaw et al <sup>14</sup> , 2018      | Veterans participants at high risk for skin cancer (history of at least 2 keratinocyte carcinomas in the past 5 years)               | HCTZ-users based on Veterans Health Administration pharmacy records (NS)                     | Non-HCTZ-users (NS)                                                                                                                                                      | Cox proportional hazards regression models               | NS                                                                                                                                                                                                                                                                               |
| Su et al <sup>15</sup> , 2018        | Adult non-Hispanic White participants aged 18 years and older with hypertension in a closed healthcare system in northern California | Thiazide-users, defined as two or more filled prescriptions during the study period          | Non-thiazide-users (nonusers of any antihypertensive drugs)                                                                                                              | Multivariable cox proportional hazards regression models | Age, sex, smoking, comorbidities, history of squamous cell carcinoma and actinic keratosis, survey year, healthcare utilization, surveillance measure, length of the health plan membership and prior history of photosensitizing antihypertensive drug use                      |
| Pedersen et al <sup>16</sup> , 2019  | Adult Danish residents                                                                                                               | HCTZ-users, at least one filled prescription of a HCTZ-containing drug before the index date | Control: up to 20 controls via risk-set sampling and matched based on age, sex and calendar time                                                                         | Multivariable conditional logistic regression models     | Matching variables (age, sex, and calendar time), comorbidities (diabetes, COPD, history of heavy alcohol consumption, and chronic renal insufficiency), CCI, highest achieved education, and medication use (photosensitizing drugs, aspirin, NSAIDs, statins or oral steroids) |
| Pottegård et al <sup>17</sup> , 2019 | Adult Taiwanese residents                                                                                                            | HCTZ-users, at least one filled prescription of a HCTZ-containing drug before the index date | Control: up to 10 controls among all Taiwanese residents were selected using a risk-set sampling and matched based on sex, age (birth year and month), and calendar time | Multivariable conditional logistic regression models     | Matching variables (age, sex, and calendar time), comorbidities (diabetes and COPD), CCI, and medication use (photosensitizing drugs, aspirin, NSAIDs, and statins)                                                                                                              |
| Daniels et al <sup>18</sup> , 2020   | Adult patients aged 65 years and older within a population of veterans residing in New South Wales                                   | HCTZ-users, filled as a single agent or in combination with other medicines                  | Control: up to 20 controls via risk-set sampling and matched based on age at the time Gold Card benefits began and sex                                                   | Multivariable conditional logistic regression models     | Matching variables (age and sex), CCI, ambient ultraviolet radiation exposure, and medication use (photosensitizing drugs, aspirin, NSAIDs, and statins)                                                                                                                         |

Abbreviations: CCI, Charlson Comorbidity Index; COPD, Chronic obstructive pulmonary disease; HCTZ, hydrochlorothiazide; NS, not specified; NSAIDs, non-steroidal anti-inflammatory drugs.

**Table S4** Methods of Included Studies in the Meta-Analysis (Continued)

| Author, Year                         | Population/Case Patients                                                                                                                                                                             | Definition of Exposure                                                                                                                                                                      | Definition of Non-exposure                                                                                                                                                                                | Statistical Methods for Data Analysis                                               | Factors Controlled for in Analysis                                                                                                                                                                                                                                                                                                                            |
|--------------------------------------|------------------------------------------------------------------------------------------------------------------------------------------------------------------------------------------------------|---------------------------------------------------------------------------------------------------------------------------------------------------------------------------------------------|-----------------------------------------------------------------------------------------------------------------------------------------------------------------------------------------------------------|-------------------------------------------------------------------------------------|---------------------------------------------------------------------------------------------------------------------------------------------------------------------------------------------------------------------------------------------------------------------------------------------------------------------------------------------------------------|
| Lee et al <sup>19</sup> , 2020       | Adult patients aged 20-80 years                                                                                                                                                                      | HCTZ-users (NS): HCTZ-only use (no other prescription drugs than HCTZ); Combination use (use of combination of HCTZ and other HTN diuretics); Ever use (both HCTZ-only and combination use) | Non-HCTZ-users (use of other antihypertensive agents)                                                                                                                                                     | Propensity score matching; Multivariable Cox proportional hazards regression models | Age, sex, CCI, comorbidities (diabetes and COPD), medication use (aspirin, NSAIDs, and statins)                                                                                                                                                                                                                                                               |
| Letellier et al <sup>20</sup> , 2020 | Adult patients transplanted with a graft that functioned for at least 3 months (kidney, pancreases, or combined kidney-pancreases). Patients received mTOR inhibitors or azathioprine were excluded. | HCTZ-users, prescribed in the post-transplant periods (at least 1 month)                                                                                                                    | Non-HCTZ-users                                                                                                                                                                                            | Multivariable time-varying Cox proportional hazards regression models               | Age, sex, re-transplantation, type of transplantation, type of donor, HLA-A - B -DR mismatch $\geq 4$ , induction therapy, maintenance treatment at transplantation, use of steroids at transplantation, initial nephropathy, cold ischemia time, and for time-varying covariates (rejection, maintenance treatment during follow-up, and other malignancies) |
| Morales et al <sup>21</sup> , 2020   | Population-based, using the longitudinal electronic medical records from general practices across the UK                                                                                             | HCTZ-users, filled 1 or more prescription before the index date                                                                                                                             | Control: randomly selected using incidence density sampling up to 20 controls matched on sex, exact year of birth and calendar year of cohort entry (up to 100 controls for the analysis with lip cancer) | Multivariable conditional logistic regression models                                | Matching variables (age and sex), body mass index, smoking status, CCI, comorbidities (history of alcohol abuse, DM, and COPD) and medication use (photosensitizing drugs, aspirin, NSAIDs, and statins)                                                                                                                                                      |
| Park et al <sup>22</sup> , 2020      | Population-based, adult patients aged 18 years and older with a first diagnosis of primary hypertension                                                                                              | HCTZ-users, filled at least 3 prescription for HCTZ                                                                                                                                         | non-HCTZ-users (treated with other antihypertensive agents and never prescribed for HCTZ during the follow-up period)                                                                                     | Multivariable Cox proportional hazards regression models                            | Age, sex, CCI, and medication use (photosensitizing drugs, aspirin, statins, and oral corticosteroids)                                                                                                                                                                                                                                                        |
| Yeon et al <sup>23</sup> , 2020      | Patients with hypertensive disorder older than 30 years                                                                                                                                              | HCTZ-users, from entry date to 2 years prior to the index date                                                                                                                              | Control: randomly matched 4 population controls by sex, age, and entry date                                                                                                                               | Multivariable conditional logistic regression models                                | Matching variables (age, sex, and entry date), other factors (NS)                                                                                                                                                                                                                                                                                             |

Abbreviations: CCI, Charlson Comorbidity Index; COPD, Chronic obstructive pulmonary disease; HCTZ, hydrochlorothiazide; mTOR, Mammalian target of rapamycin; NS, not specified; NSAIDs, non-steroidal anti-inflammatory drugs; UK, United Kingdom.

**Table S4** Methods of Included Studies in the Meta-Analysis (Continued)

| Author, Year                             | Population/Case Patients                                                                                                        | Definition of Exposure                                                                                                    | Definition of Non-exposure                                                                                                                               | Statistical Methods for Data Analysis                                                                                         | Factors Controlled for in Analysis                                                                                                                                                                                                                                                                                                                                                                                                                                                                                                    |
|------------------------------------------|---------------------------------------------------------------------------------------------------------------------------------|---------------------------------------------------------------------------------------------------------------------------|----------------------------------------------------------------------------------------------------------------------------------------------------------|-------------------------------------------------------------------------------------------------------------------------------|---------------------------------------------------------------------------------------------------------------------------------------------------------------------------------------------------------------------------------------------------------------------------------------------------------------------------------------------------------------------------------------------------------------------------------------------------------------------------------------------------------------------------------------|
| Adalsteinsson et al <sup>24</sup> , 2021 | Population-based: the entire Icelandic population                                                                               | Had filled 1 or more HCTZ prescriptions at least 2 years before the index date (date of keratinocyte carcinoma diagnosis) | Control: up to 10 population control individuals were randomly selected from the National Registry of Iceland and matched based on year of birth and sex | Multivariable conditional logistic regression models                                                                          | Matching variables (age and sex), and photosensitizing drugs                                                                                                                                                                                                                                                                                                                                                                                                                                                                          |
| de Haan-Du et al <sup>25</sup> , 2021    | Adult type 2 diabetes patients                                                                                                  | HCTZ users (including its combination) at baseline; thiazide-like diuretics (chlorthalidone and indapamide)               | Non-HCTZ users                                                                                                                                           | Multivariable Cox proportional hazards regression models                                                                      | Age, sex, smoking status, body mass index, systolic blood pressure, serum creatinine, and medications (angiotensin-converting enzyme inhibitors, angiotensin-receptor blockers, calcium channel blockers, beta-blockers, other diuretics, sulfonyleureas, metformin, lipid lowering drugs, and NSAIDs)                                                                                                                                                                                                                                |
| Drucker et al <sup>26</sup> , 2021       | Population-based: patients aged 65 years and older                                                                              | New users of thiazides: chlorthalidone, HCTZ, indapamide, metolazone                                                      | Unexposed to antihypertensive (age- and sex-matched)                                                                                                     | Multivariable Cox proportional hazards regression models                                                                      | Age, sex, rurality, income according to postal code, year of index date, number of physician visits, CCI, hypertension, and time-varying covariates (medication use: immunosuppressive drugs, photosensitizing drugs, cumulative dosage/duration of other antihypertensive classes, and ever use of each antihypertensive class)                                                                                                                                                                                                      |
| Eworuke et al <sup>27</sup> , 2021       | Patient with no diagnosis of any cancer type, no use of any chemotherapeutic agent in any formulation, and no radiation therapy | New users of any HCTZ-containing products                                                                                 | New user of angiotensin-converting enzyme inhibitors monotherapy or non-HCTZ angiotensin-converting enzyme inhibitors combination products               | Propensity score matching (nearest neighbor approach, caliper=0.05); Multivariable Cox proportional hazards regression models | Age, sex, actinic keratosis, arsenic exposure, diabetes, human papillomavirus, chronic pulmonary disease, connective tissue disease, cardiovascular disease, moderate/severe renal disease, transplant, HIV, immune disorders, severe skin disease, white blood cell disease, mole removal, naevi, xeroderma pigmentosum, ultraviolet radiation exposure, alcohol use/abuse, comorbidity score, health service utilization intensity, medications (drugs with chemoprotective effects, glucocorticoids, photosensitizing medications) |

Abbreviations: CCI, Charlson Comorbidity Index; HCTZ, hydrochlorothiazide; HIV, human immunodeficiency virus; NSAIDs, non-steroidal anti-inflammatory drugs.

**Table S4** Methods of Included Studies in the Meta-Analysis (Continued)

| Author, Year                                        | Population/Case Patients                                                                                             | Definition of Exposure                                                                                                            | Definition of Non-exposure                                                                                             | Statistical Methods for Data Analysis                    | Factors Controlled for in Analysis                                                                                                                                                                                                                                                                                                                                                              |
|-----------------------------------------------------|----------------------------------------------------------------------------------------------------------------------|-----------------------------------------------------------------------------------------------------------------------------------|------------------------------------------------------------------------------------------------------------------------|----------------------------------------------------------|-------------------------------------------------------------------------------------------------------------------------------------------------------------------------------------------------------------------------------------------------------------------------------------------------------------------------------------------------------------------------------------------------|
| Habel et al <sup>28</sup> , 2021                    | Adult non-Hispanic White participants                                                                                | HCTZ-users (ascertained from cohort entry to two year before index date and was based on prescriptions filled at KPNC pharmacies) | Control: up to 50 cancer-free control, matched for birth year (exact year), sex, and year of joining KPNC (exact year) | Multivariable conditional logistic regression models     | Matching variables (age, sex, and calendar time), highest education achieved and socioeconomic level based on the United States Census block of resident, and number of ambulatory visits, including dermatology visits, internal medicine visits, and urgent care visits for the period from start of follow-up to 1 year prior to the index date                                              |
| Kim et al <sup>29</sup> , 2021                      | Adult participants randomly selected from 97.1% of people in the country enrolled into the national health insurance | HCTZ-users, had been taking for >6 months with a cumulative dose of $\geq 2,500$ mg                                               | Non-HCTZ-users, randomly selected and matched for age, index date, sex and income level                                | Multivariable Cox proportional hazards regression models | Age, sex, income level, CCI, comorbidities (hypertension, diabetes, dyslipidemia, thyroid disorders), medication use (photosensitizing drugs)                                                                                                                                                                                                                                                   |
| León-Muñoz et al <sup>30</sup> , SIDIAP cohort 2021 | Population-based: patients aged 18 years and older                                                                   | HCTZ-users (alone or in combination with other active drug: filled at least one prescription)                                     | Control: up to 10 controls using a risk-set sampling strategy matched to cases by sex and age $\pm 1$ year             | Multivariable conditional logistic regression models     | Age, sex, time up to index date, smoking, comorbid conditions (diabetes, COPD, chronic kidney disease, myocardial infection, heart failure, peripheral vascular disease, cerebrovascular accident, dementia/Alzheimer disease, connective tissue disease, gastric ulcer, hemiplegia, liver disease), and medication use (photosensitizing drugs, aspirin, NSAIDs, glucocorticoids, and statins) |
| León-Muñoz et al <sup>30</sup> , BIFAP cohort 2021  | Population-based: patients aged 18 years and older                                                                   | HCTZ-users (alone or in combination with other active drug: filled at least one prescription)                                     | Control: up to 10 controls using a risk-set sampling strategy matched to cases by sex and age $\pm 1$ year             | Multivariable conditional logistic regression models     | Age, sex, time up to index date, smoking, comorbid conditions (diabetes, COPD, chronic kidney disease, myocardial infection, heart failure, peripheral vascular disease, cerebrovascular accident, dementia/Alzheimer disease, connective tissue disease, gastric ulcer, hemiplegia, liver disease), and medication use (photosensitizing drugs, aspirin, NSAIDs, glucocorticoids, and statins) |

Abbreviations: BIFAP, Base de Datos para la Investigación Farmacoepidemiológica en Atención Primaria; CCI, Charlson Comorbidity Index; COPD, Chronic obstructive pulmonary disease; HCTZ, hydrochlorothiazide; KPNC, Kaiser Permanente Northern California; NSAIDs, non-steroidal anti-inflammatory drugs; SIDIAP, Spain: Information System for Research in Primary Care.

**Table S4** Methods of Included Studies in the Meta-Analysis (Continued)

| Author, Year                         | Population/Case Patients                           | Definition of Exposure                             | Definition of Non-exposure                                                                                                                                                                                                                                                   | Statistical Methods for Data Analysis                                                                                         | Factors Controlled for in Analysis                                                                                                                                                                                                                                                                                                                                                                                                                                                                                                                                                                                                              |
|--------------------------------------|----------------------------------------------------|----------------------------------------------------|------------------------------------------------------------------------------------------------------------------------------------------------------------------------------------------------------------------------------------------------------------------------------|-------------------------------------------------------------------------------------------------------------------------------|-------------------------------------------------------------------------------------------------------------------------------------------------------------------------------------------------------------------------------------------------------------------------------------------------------------------------------------------------------------------------------------------------------------------------------------------------------------------------------------------------------------------------------------------------------------------------------------------------------------------------------------------------|
| Rouette et al <sup>31</sup> , 2021   | Population-based: patients aged 18 years and older | New users of HCTZ                                  | New user of other thiazide diuretics (bendroflumethiazide, chlorothiazide, trichlormethiazide, methyclothiazide, polythiazide, quinethazone, hydroflumethiazide, benzthiazide, cyclopenthiazide, mefruside, indapamide, chlorthalidone, clopamide, xipamide, and metolazone) | Propensity score matching (nearest neighbor approach, caliper=0.01); Multivariable Cox proportional hazards regression models | Age, sex, body mass index, smoking status, number of physician visits in the year before cohort entry, skin cancer risk factors (presence of naevi and precancerous skin lesions), comorbid conditions (alcohol-related disorder, chronic heart failure, myocardial infarction, stroke, peripheral vascular disease, previous cancers--other than skin cancer, rheumatoid arthritis, inflammatory bowel disorder, psoriasis, lupus, vasculitis, and previous organ transplantation), and medication use (NSAIDs, statins, antidiabetic drugs, antihypertensive drugs, antiparkinsonian drugs, and immunosuppressive and immunomodulatory drugs) |
| Schneider et al <sup>32</sup> , 2021 | Population-based: patients aged 18-85 years        | New users of thiazides and thiazide-like diuretics | Active comparator: calcium channel blockers (or renin-angiotensin-aldosterone system inhibitors)                                                                                                                                                                             | Propensity score weighted; Multivariable negative binomial and Poisson regression models                                      | Age, sex, year of cohort entry, region, smoking status, alcohol consumption, body mass index, number of days of history within the CPRD prior to cohort entry date, number of general practitioner visits in the year prior to cohort entry date, number of different prescribed agents in the year prior to cohort entry date, CCI, comorbidities (diabetes, COPD, myocardial infarction, ischemic heart disease, chronic heart failure, and hypertension), medication use (photosensitizing drugs, aspirin, NSAIDs, statins, beta-blockers, and renin-angiotensin-aldosterone system inhibitors)                                              |

Abbreviations: CCI, Charlson Comorbidity Index; CPRD, Clinical Practice Research Datalink; COPD, Chronic obstructive pulmonary disease; HCTZ, hydrochlorothiazide; NSAIDs, non-steroidal anti-inflammatory drugs.

**Table S5** Comorbidities and Skin Conditions of Study Participants Included in the Meta-Analysis

| Author, Year                         | Smoking Status, No. (%)                                                                      | Hypertension, No. (%) | Diabetes, No. (%)                                    | Chronic Pulmonary Disease, No. (%)                  | Naevi, No. (%) | Precancer skin, No. (%) | Ultraviolet Exposure, No. (%)                                                                  | Solid Organ Transplant, No. (%) |
|--------------------------------------|----------------------------------------------------------------------------------------------|-----------------------|------------------------------------------------------|-----------------------------------------------------|----------------|-------------------------|------------------------------------------------------------------------------------------------|---------------------------------|
| Westerdahl et al <sup>1</sup> , 1996 | Current, 222 (24.4)                                                                          | NR                    | NR                                                   | NR                                                  | NR             | NR                      | NR                                                                                             | NR                              |
| Jensen et al <sup>2</sup> , 2008     | NR                                                                                           | NR                    | NR                                                   | NR                                                  | NR             | NR                      | NR                                                                                             | NR                              |
| Kaae et al <sup>3</sup> , 2010       | NR                                                                                           | NR                    | NR                                                   | NR                                                  | NR             | NR                      | NR                                                                                             | NR                              |
| Ruiter et al <sup>4</sup> , 2010     | Current, 2286 (21.5);<br>former, 4644 (43.6);<br>never, 3707 (34.9)                          | NR                    | NR                                                   | NR                                                  | NR             | NR                      | High tendency to sunburn, 3216 (30.1);<br>outdoor work (>4 h daily for >25 years), 1187 (11.1) | NR                              |
| de Vries et al <sup>5</sup> , 2012   | Current, 519 (17.8);<br>former, 848 (29.1);<br>never, 1551 (53.1)                            | NR                    | NR                                                   | NR                                                  | 2196 (75.2)    | NR                      | Having (had) outdoor occupation, 1236 (66.1)                                                   | NR                              |
| Friedman et al <sup>6</sup> , 2012   | Current, 6100 (25.8);<br>former, 6971 (29.5);<br>never, 3902 (16.5);<br>unknown, 6643 (28.1) | NR                    | NR                                                   | NR                                                  | NR             | NR                      | NR                                                                                             | 0 (0.0)                         |
| Traianou et al <sup>7</sup> , 2012   | NR                                                                                           | NR                    | NR                                                   | NR                                                  | NR             | NR                      | NR                                                                                             | NR                              |
| Robinson et al <sup>8</sup> , 2013   | NR                                                                                           | NR                    | NR                                                   | NR                                                  | NR             | NR                      | NR                                                                                             | NR                              |
| Schmidt et al <sup>9</sup> , 2015    | NR                                                                                           | 25467 (10.0)          | NR                                                   | 11329 (4.4)                                         | NR             | NR                      | NR                                                                                             | 0 (0.0)                         |
| Nardone et al <sup>10</sup> , 2017   | NR                                                                                           | NR                    | NR                                                   | NR                                                  | NR             | NR                      | NR                                                                                             | 0 (0.0)                         |
| Pottegård et al <sup>11</sup> , 2017 | NR                                                                                           | NR                    | 5182 (8.1)                                           | 3722 (5.8)                                          | NR             | NR                      | NR                                                                                             | 0 (0.0)                         |
| Pedersen et al <sup>12</sup> , 2018  | NR                                                                                           | NR                    | BCC cohort, 101272 (6.7);<br>SCC cohort, 15350 (8.5) | BCC cohort, 69863 (4.6);<br>SCC cohort, 11589 (6.4) | NR             | NR                      | NR                                                                                             | 0 (0.0)                         |
| Pottegård et al <sup>13</sup> , 2018 | NR                                                                                           | NR                    | NR                                                   | NR                                                  | NR             | NR                      | NR                                                                                             | 0 (0.0)                         |

Abbreviations: BCC, basal cell carcinoma; NR, not reported; SCC, squamous cell carcinoma.

**Table S5** Comorbidities and Skin Conditions of Study Participants Included in the Meta-Analysis (Continued)

| Author, Year                         | Smoking Status, No. (%)                                                                                                                                | Hypertension, No. (%) | Diabetes, No. (%)                              | Chronic Pulmonary Disease, No. (%)            | Naevi, No. (%) | Precancer skin, No. (%)        | Ultraviolet Exposure, No. (%)                                                                                                      | Solid Organ Transplant, No. (%) |
|--------------------------------------|--------------------------------------------------------------------------------------------------------------------------------------------------------|-----------------------|------------------------------------------------|-----------------------------------------------|----------------|--------------------------------|------------------------------------------------------------------------------------------------------------------------------------|---------------------------------|
| Shaw et al <sup>14</sup> , 2018      | NR                                                                                                                                                     | NR                    | NR                                             | 0 (0.0)                                       | NR             | NR                             | NR                                                                                                                                 | 0 (0.0)                         |
| Su et al <sup>15</sup> , 2018        | Current, 2219 (7.8%); past, 13247 (46.7%); never, 12217 (43.1%); unknown, 674 (2.4%)                                                                   | 18244 (100.0)         | NR                                             | NR                                            | NR             | Actinic keratosis, 9972 (35.2) | NR                                                                                                                                 | 0 (0.0)                         |
| Pedersen et al <sup>16</sup> , 2019  | NR                                                                                                                                                     | NR                    | MCC cohort, 206 (10.5); MAST cohort, 258 (9.4) | MCC cohort, 154 (7.9); MAST cohort, 190 (6.9) | NR             | NR                             | NR                                                                                                                                 | 0 (0.0)                         |
| Pottegård et al <sup>17</sup> , 2019 | NR                                                                                                                                                     | NR                    | 51741 (16.2)                                   | 10688 (3.3)                                   | NR             | NR                             | NR                                                                                                                                 | 0 (0.0)                         |
| Daniels et al <sup>18</sup> , 2020   | NR                                                                                                                                                     | NR                    | NR                                             | NR                                            | NR             | NR                             | Lip cohort: lowest, NR; middle, 664 (72.9); highest, NR; MM cohort: lowest, 1859 (14.2); middle, 9418 (71.9); highest, 1828 (13.9) | 0 (0.0)                         |
| Lee et al <sup>19</sup> , 2020       | NR                                                                                                                                                     | NR                    | 100562 (33.6)                                  | 23998 (8.0)                                   | NR             | NR                             | NR                                                                                                                                 | 0 (0.0)                         |
| Letellier et al <sup>20</sup> , 2020 | NR                                                                                                                                                     | NR                    | NR                                             | NR                                            | NR             | NR                             | NR                                                                                                                                 | 2496 (100.0)                    |
| Morales et al <sup>21</sup> , 2020   | Current: SCC cohort, 14951 (9.4); BCC cohort, 215346 (11.5); melanoma cohort, 32963 (14.0); lip cohort, 10013 (14.1); oral cavity cohort, 11485 (15.6) | NR                    | NR                                             | NR                                            | NR             | NR                             | NR                                                                                                                                 | 0 (0.0)                         |
| Park et al <sup>22</sup> , 2020      | NR                                                                                                                                                     | 3565952 (100.0)       | NR                                             | NR                                            | NR             | NR                             | NR                                                                                                                                 | 0 (0.0)                         |
| Yeon et al <sup>23</sup> , 2020      | NR                                                                                                                                                     | NR                    | NR                                             | NR                                            | NR             | NR                             | NR                                                                                                                                 | NR                              |

Abbreviations: BCC, basal cell carcinoma; MAST, malignant adnexal skin tumors; MCC, Merkel cell carcinoma; MM, malignant melanoma; NR, not reported; SCC, squamous cell carcinoma.

**Table S5** Comorbidities and Skin Conditions of Study Participants Included in the Meta-Analysis (Continued)

| Author, Year                                        | Smoking Status, No. (%)                                                                | Hypertension, No. (%) | Diabetes, No. (%)                                           | Chronic Pulmonary Disease, No. (%) | Naevi, No. (%) | Precancer skin, No. (%)         | Ultraviolet Exposure, No. (%)                                                                                                            | Solid Organ Transplant, No. (%) |
|-----------------------------------------------------|----------------------------------------------------------------------------------------|-----------------------|-------------------------------------------------------------|------------------------------------|----------------|---------------------------------|------------------------------------------------------------------------------------------------------------------------------------------|---------------------------------|
| Adalsteinsson et al <sup>24</sup> , 2021            | NR                                                                                     | NR                    | NR                                                          | NR                                 | NR             | NR                              | NR                                                                                                                                       | NR                              |
| de Haan-Du et al <sup>25</sup> , 2021               | No, 47497 (67.4); ever, 14813 (21.0); unknown, 8184 (11.6)                             | NR                    | 70494 (100.0)                                               | NR                                 | NR             | NR                              | NR                                                                                                                                       | NR                              |
| Drucker et al <sup>26</sup> , 2021                  | NR                                                                                     | 101807 (38.8)         | NR                                                          | NR                                 | NR             | 0 (0.0)                         | NR                                                                                                                                       | 0 (0.0)                         |
| Eworuke et al <sup>27</sup> , 2021                  | NR                                                                                     | NR                    | 2532702 (24.3)                                              | 1313252 (12.6)                     | 72958 (0.7)    | Actinic keratosis, 302256 (2.9) | Low, 10422 (0.1); moderate, 4320185 (41.4); high, 4179480 (40.1); very high, 1751004 (16.8); extreme, 10422 (0.1); unknown, 145916 (1.4) | 26057 (0.3)                     |
| Habel et al <sup>28</sup> , 2021                    | NR                                                                                     | NR                    | NR                                                          | NR                                 | NR             | NR                              | NR                                                                                                                                       | NR                              |
| Kim et al <sup>29</sup> , 2021                      | NR                                                                                     | 69447 (55.8)          | 23664 (19.0)                                                | NR                                 | NR             | 298 (0.2)                       | NR                                                                                                                                       | 118 (0.1)                       |
| León-Muñoz et al <sup>30</sup> , SIDIAP cohort 2021 | Non-melanoma cohort, 96164 (11.8); MM cohort, 14291 (16.2)                             | NR                    | Non-melanoma cohort, 159453 (19.6); MM cohort, 11050 (12.5) | NR                                 | NR             | NR                              | NR                                                                                                                                       | 0 (0.0)                         |
| León-Muñoz et al <sup>30</sup> , BIFAP cohort 2021  | Non-melanoma cohort, 58300 (17.1%); MM cohort, 9965 (19.4%)                            | NR                    | Non-melanoma cohort, 55876 (16.4); MM cohort, 5914 (11.5)   | NR                                 | NR             | NR                              | NR                                                                                                                                       | 0 (0.0)                         |
| Rouette et al <sup>31</sup> , 2021                  | Current, 10574 (25.8); past, 5579 (13.6); never, 18591 (45.3); unknown, 6282 (15.3)    | NR                    | NR                                                          | NR                                 | 1249 (3.0)     | 2773 (6.8)                      | NR                                                                                                                                       | 36 (0.1)                        |
| Schneider et al <sup>32</sup> , 2021                | Current, 99420 (18.2); past, 135063 (24.7); never, 260469 (47.7); unknown, 51465 (9.4) | 459836 (84.2)         | 22814 (4.2)                                                 | 22294 (4.1)                        | NR             | NR                              | NR                                                                                                                                       | 0 (0.0)                         |

Abbreviations: BCC, basal cell carcinoma; MAST, malignant adnexal skin tumors; MCC, Merkel cell carcinoma; MM, malignant melanoma; NR, not reported; SCC, squamous cell carcinoma.



**Table S6** Concomitant Medication Use of Included Studies

| Author, Year                         | Immuno-suppressant, No. (%) | RAS Inhibitors, No. (%)                | Beta-blockers, No. (%) | Calcium Channel Blockers, No. (%) | Aspirin, No. (%)                                    | NSAIDs, n (%)                                       | Statins, n (%)                                      | Photosensitivity Agents, No. (%) |
|--------------------------------------|-----------------------------|----------------------------------------|------------------------|-----------------------------------|-----------------------------------------------------|-----------------------------------------------------|-----------------------------------------------------|----------------------------------|
| Westerdahl et al <sup>1</sup> , 1996 | NR                          | NR                                     | 95 (10.5)              | NR                                | NR                                                  | NR                                                  | NR                                                  | NR                               |
| Jensen et al <sup>2</sup> , 2008     | NR                          | NR                                     | NA                     | NR                                | NR                                                  | NR                                                  | NR                                                  | NR                               |
| Kaae et al <sup>3</sup> , 2010       | NR                          | NR                                     | NA                     | NR                                | NR                                                  | NR                                                  | NR                                                  | NR                               |
| Ruiter et al <sup>4</sup> , 2010     | NR                          | NR                                     | NR                     | NR                                | NR                                                  | NR                                                  | NR                                                  | NR                               |
| de Vries et al <sup>5</sup> , 2012   | 0 (0.0)                     | NR                                     | NR                     | NR                                | NR                                                  | 411 (14.1)                                          | NR                                                  | NR                               |
| Friedman et al <sup>6</sup> , 2012   | NR                          | 3391 (14.4)                            | 2765 (11.7)            | 1002 (4.2)                        | NR                                                  | NR                                                  | NR                                                  | NR                               |
| Traianou et al <sup>7</sup> , 2012   | 0 (0.0)                     | NR                                     | NR                     | NR                                | NR                                                  | NR                                                  | NR                                                  | NR                               |
| Robinson et al <sup>8</sup> , 2013   | NR                          | NR                                     | NR                     | NR                                | NR                                                  | NR                                                  | NR                                                  | NR                               |
| Schmidt et al <sup>9</sup> , 2015    | NR                          | 40612 (15.9)                           | 40338 (15.8)           | 33334 (13.1)                      | 44246 (17.4)                                        | 81107 (31.8)                                        | 34955 (13.7)                                        | NR                               |
| Nardone et al <sup>10</sup> , 2017   | NR                          | 5609 (9.2)                             | NR                     | NR                                | NR                                                  | NR                                                  | NR                                                  | NR                               |
| Pottegård et al <sup>11</sup> , 2017 | 0 (0.0)                     | NR                                     | NR                     | NR                                | 18066 (28.4)                                        | 32950 (51.7)                                        | 13024 (20.4)                                        | 28128 (44.2)                     |
| Pedersen et al <sup>12</sup> , 2018  | 0 (0.0)                     | NR                                     | NR                     | NR                                | BCC cohort, 298917 (19.9); SCC cohort, 57292 (31.6) | BCC cohort, 763444 (50.8); SCC cohort, 94179 (52.0) | BCC cohort, 238108 (15.8); SCC cohort, 34192 (18.9) | NR                               |
| Pottegård et al <sup>13</sup> , 2018 | 0 (0.0)                     | NR                                     | NR                     | NR                                | NR                                                  | NR                                                  | NR                                                  | NR                               |
| Shaw et al <sup>14</sup> , 2018      | NR                          | NR                                     | NR                     | NR                                | NR                                                  | NR                                                  | NR                                                  | NR                               |
| Su et al <sup>15</sup> , 2018        | NR                          | ACEIs, 11658 (41.1); ARBs, 5251 (18.5) | 15792 (55.7)           | 9383 (33.1)                       | NR                                                  | NR                                                  | NR                                                  | NR                               |

Abbreviations: ACEIs, angiotensin-converting enzyme inhibitors; ARBs, angiotensin receptor blockers; BCC, basal cell carcinoma; NR, not reported; NSAIDs, non-steroidal anti-inflammatory drugs; RAS, renin-angiotensin system; SCC, squamous cell carcinoma.

**Table S6** Concomitant Medication Use of Included Studies (Continued)

| Author, Year                             | Immuno-suppressant, No. (%) | RAS Inhibitors, No. (%)                         | Beta-blockers, No. (%) | Calcium Channel Blockers, No. (%)              | Aspirin, No. (%)                                                                                                                         | NSAIDs, n (%)                                                                                                                            | Statins, n (%)                                                                                                                           | Photosensitivity Agents, No. (%)               |
|------------------------------------------|-----------------------------|-------------------------------------------------|------------------------|------------------------------------------------|------------------------------------------------------------------------------------------------------------------------------------------|------------------------------------------------------------------------------------------------------------------------------------------|------------------------------------------------------------------------------------------------------------------------------------------|------------------------------------------------|
| Pedersen et al <sup>16</sup> , 2019      | 0 (0.0)                     | NR                                              | NR                     | NR                                             | MCC cohort, 687 (34.7); MAST cohort, 729 (26.5)                                                                                          | MCC cohort, 1130 (57.8); MAST cohort, 1480 (53.8)                                                                                        | MCC cohort, 496 (25.4); MAST cohort, 600 (21.8)                                                                                          | NR                                             |
| Pottegård et al <sup>17</sup> , 2019     | NR                          | NR                                              | NR                     | NR                                             | 65803 (20.6)                                                                                                                             | 213271 (66.7)                                                                                                                            | 49752 (15.6)                                                                                                                             | 22079 (6.9)                                    |
| Daniels et al <sup>18</sup> , 2020       | 0 (0.0)                     | Lip cohort, 589 (64.6); MM cohort, 10012 (76.4) | NR                     | Lip cohort, 212 (23.3); MM cohort, 4825 (36.8) | Lip cohort, NA; MM cohort, 452 (3.4)                                                                                                     | Lip cohort, 374 (41.1); MM cohort, 5067 (38.7)                                                                                           | Lip cohort, 495 (54.3); MM cohort, 7063 (53.9)                                                                                           | Lip cohort, 165 (18.1); MM cohort, 2416 (18.4) |
| Lee et al <sup>19</sup> , 2020           | 0 (0.0)                     | NR                                              | NR                     | NR                                             | 131330 (43.9)                                                                                                                            | 106502 (35.6)                                                                                                                            | 114675 (38.3)                                                                                                                            | NR                                             |
| Letellier et al <sup>20</sup> , 2020     | 2496 (100.0)                | NR                                              | NR                     | NR                                             | NR                                                                                                                                       | NR                                                                                                                                       | NR                                                                                                                                       | NR                                             |
| Morales et al <sup>21</sup> , 2020       | 0 (0.0)                     | NR                                              | NR                     | NR                                             | SCC cohort, 42036 (26.5); BCC cohort, 348516 (18.6); MM cohort, 27811 (11.8); lip cohort, 10971 (15.4); oral cavity cohort, 10163 (13.8) | SCC cohort, 62449 (39.3); BCC cohort, 651384 (34.8); MM cohort, 73139 (31.1); lip cohort, 22009 (30.9); oral cavity cohort, 24218 (32.8) | SCC cohort, 46259 (29.1); BCC cohort, 359782 (19.2); MM cohort, 32715 (13.9); lip cohort, 11754 (16.5); oral cavity cohort, 12841 (17.4) | NR                                             |
| Park et al <sup>22</sup> , 2020          | 0 (0.0)                     | NR                                              | NR                     | NR                                             | NR                                                                                                                                       | NR                                                                                                                                       | NR                                                                                                                                       | NR                                             |
| Yeon et al <sup>23</sup> , 2020          | NR                          | NR                                              | NR                     | NR                                             | NR                                                                                                                                       | NR                                                                                                                                       | NR                                                                                                                                       | NR                                             |
| Adalsteinsson et al <sup>24</sup> , 2021 | 0 (0.0)                     | NR                                              | NR                     | NR                                             | NR                                                                                                                                       | NR                                                                                                                                       | NR                                                                                                                                       | NR                                             |
| de Haan-Du et al <sup>25</sup> , 2021    | NR                          | 25338 (35.9)                                    | 19547 (27.7)           | 10307 (14.6)                                   | NR                                                                                                                                       | 3977 (5.6)                                                                                                                               | NR                                                                                                                                       | NR                                             |
| Drucker et al <sup>26</sup> , 2021       | 0 (0.0)                     | NR                                              | NR                     | NR                                             | NR                                                                                                                                       | NR                                                                                                                                       | NR                                                                                                                                       | 0 (0.0)                                        |

Abbreviations: BCC, basal cell carcinoma; MAST, malignant adnexal skin tumors; MCC, Merkel cell carcinoma; MM, malignant melanoma; NR, not reported; NSAIDs, non-steroidal anti-inflammatory drugs; RAS, renin-angiotensin system; SCC, squamous cell carcinoma.

**Table S6** Concomitant Medication Use of Included Studies (Continued)

| Author, Year                                        | Immuno-suppressant, No. (%) | RAS Inhibitors, No. (%)                                        | Beta-blockers, No. (%) | Calcium Channel Blockers, No. (%)                            | Aspirin, No. (%)                                               | NSAIDs, n (%)                                                  | Statins, n (%)                                                 | Photosensitivity Agents, No. (%)                             |
|-----------------------------------------------------|-----------------------------|----------------------------------------------------------------|------------------------|--------------------------------------------------------------|----------------------------------------------------------------|----------------------------------------------------------------|----------------------------------------------------------------|--------------------------------------------------------------|
| Eworuke et al <sup>27</sup> , 2021                  | 2892283 (27.7)              | 5211321 (50.0)                                                 | NR                     | NR                                                           | NR                                                             | NR                                                             | NR                                                             | 1407056 (13.5)                                               |
| Habel et al <sup>28</sup> , 2021                    | NR                          | NR                                                             | NR                     | NR                                                           | NR                                                             | NR                                                             | NR                                                             | NR                                                           |
| Kim et al <sup>29</sup> , 2020                      | NR                          | NR                                                             | NR                     | NR                                                           | NR                                                             | 63409 (50.9)                                                   | NR                                                             | 13155 (10.6)                                                 |
| León-Muñoz et al <sup>30</sup> , SIDIAP cohort 2021 | 0 (0.0)                     | Non-melanoma cohort, 408621 (50.2);<br>MM cohort, 26784 (30.4) | NR                     | Non-melanoma cohort, 109595 (13.5);<br>MM cohort, 6470 (7.3) | Non-melanoma cohort, 171941 (21.1);<br>MM cohort, 10383 (11.8) | Non-melanoma cohort, 430043 (52.8);<br>MM cohort, 38862 (44.1) | Non-melanoma cohort, 276612 (34.0);<br>MM cohort, 19350 (22.0) | Non-melanoma cohort, 91032 (11.2);<br>MM cohort, 6929 (7.9)  |
| León-Muñoz et al <sup>30</sup> , BIFAP cohort 2021  | 0 (0.0)                     | Non-melanoma cohort, 155181 (45.4);<br>MM cohort, 15535 (30.3) | NR                     | Non-melanoma cohort, 49035 (14.4);<br>MM cohort, 4707 (9.2)  | Non-melanoma cohort, 58451 (17.1);<br>MM cohort, 5491 (10.7)   | Non-melanoma cohort, 158367 (46.3);<br>MM cohort, 23286 (45.4) | Non-melanoma cohort, 96970 (28.4);<br>MM cohort, 10544 (20.6)  | Non-melanoma cohort, 38738 (11.3);<br>MM cohort, 5117 (10.0) |
| Rouette et al <sup>31</sup> , 2021                  | 1154 (2.8)                  | 21563 (52.6)                                                   | 10843 (26.4)           | 9761 (23.8)                                                  | NR                                                             | 22792 (55.6)                                                   | 8195 (20.0)                                                    | NR                                                           |
| Schneider et al <sup>32</sup> , 2021                | 0 (0.0)                     | 111048 (20.3)                                                  | 99234 (18.2)           | 275263 (50.0)                                                | 69174 (12.7%)                                                  | 129203 (23.6)                                                  | 69666 (12.7)                                                   | 48891 (8.9)                                                  |

Abbreviations: BCC, basal cell carcinoma; MM, malignant melanoma; NR, not reported; NSAIDs, non-steroidal anti-inflammatory drugs; RAS, renin-angiotensin system; SCC, squamous cell carcinoma.

**Table S7** Risk of Bias Assessment of Included Studies by the NOS

| First Author,<br>Year                    | Cohort Studies          |                               |                            |                                     |                                                                |                                                       |            |                              |                              | Total<br>NOS |
|------------------------------------------|-------------------------|-------------------------------|----------------------------|-------------------------------------|----------------------------------------------------------------|-------------------------------------------------------|------------|------------------------------|------------------------------|--------------|
|                                          | Selection               |                               |                            |                                     | Comparability                                                  |                                                       | Outcomes   |                              |                              |              |
|                                          | Representa-<br>tiveness | Non-<br>Exposed:<br>Selection | Exposure:<br>Ascertainment | Outcomes<br>Not Present<br>at Entry | Controls for: age<br>and Fitzpatrick skin<br>type/sun exposure | Control<br>for:<br>additional<br>Factors <sup>†</sup> | Assessment | Follow-<br>up Long<br>Enough | Adequacy<br>of follow-<br>up |              |
| Kaae et al <sup>3</sup> , 2010           | *                       | *                             | *                          | *                                   | ...                                                            | ...                                                   | *          | *                            | *                            | 7            |
| Ruiter et al <sup>4</sup> , 2010         | *                       | *                             | *                          | *                                   | ...                                                            | ...                                                   | *          | *                            | *                            | 7            |
| Nardone et al <sup>10</sup> ,<br>2017    | *                       | *                             | *                          | *                                   | ...                                                            | *                                                     | *          | *                            | *                            | 8            |
| Su et al <sup>15</sup> , 2018            | *                       | *                             | *                          | *                                   | ...                                                            | *                                                     | *          | *                            | *                            | 8            |
| Lee et al <sup>19</sup> , 2020           | *                       | *                             | *                          | *                                   | ...                                                            | *                                                     | *          | *                            | *                            | 8            |
| Letellier et al <sup>20</sup> ,<br>2020  | ...                     | *                             | *                          | *                                   | ...                                                            | *                                                     | *          | *                            | *                            | 7            |
| Park et al <sup>22</sup> , 2020          | *                       | *                             | *                          | *                                   | ...                                                            | *                                                     | *          | *                            | *                            | 8            |
| de Haan-Du et<br>al <sup>25</sup> , 2021 | *                       | *                             | *                          | *                                   | ...                                                            | *                                                     | *          | *                            | *                            | 8            |
| Drucker et al <sup>26</sup> ,<br>2021    | *                       | *                             | *                          | *                                   | ...                                                            | *                                                     | *          | *                            | *                            | 8            |
| Eworuke et al <sup>27</sup> ,<br>2021    | *                       | *                             | *                          | *                                   | *                                                              | *                                                     | *          | *                            | *                            | 9            |
| Kim et al <sup>29</sup> , 2020           | *                       | *                             | *                          | *                                   | ...                                                            | *                                                     | *          | *                            | *                            | 8            |
| Rouette et al <sup>31</sup> ,<br>2021    | *                       | *                             | *                          | *                                   | ...                                                            | *                                                     | *          | *                            | *                            | 8            |
| Schneider et al <sup>32</sup> ,<br>2021  | *                       | *                             | *                          | *                                   | ...                                                            | *                                                     | *          | *                            | *                            | 8            |

<sup>†</sup>Study control for 3 of additional factors: sex, race/ethnic, skin tanning, smoking, alcohol consumption, precancerous skin conditions, comorbidities, photosensitizing drugs, medications with potential antineoplastic properties (e.g., aspirin, NSAIDs, statins), other antihypertensive agents, human papillomavirus; immunosuppression/immunosuppressive drugs, environmental hazards/occupational risks (e.g., exposure of arsenic, polycyclic aromatic hydrocarbons, nitrosamine, alkylating agents), and genetic predisposing factors (e.g., xeroderma pigmentosum).

Abbreviations: NOS, Newcastle-Ottawa Scale; NSAIDs, non-steroidal anti-inflammatory drugs.

**Table S7** Risk of Bias Assessment of Included Studies (Continued)

| First Author, Year                                  | Case-Control Studies |                           |                     |                       |                                                          |                                              |               |             |                   | Total NOS |
|-----------------------------------------------------|----------------------|---------------------------|---------------------|-----------------------|----------------------------------------------------------|----------------------------------------------|---------------|-------------|-------------------|-----------|
|                                                     | Selection            |                           | Comparability       |                       | Exposure                                                 |                                              |               |             |                   |           |
|                                                     | Cases: Definition    | Cases: Representativeness | Controls: Selection | Controls: Definitions | Controls for: age and Fitzpatrick skin type/sun exposure | Control for: additional Factors <sup>†</sup> | Ascertainment | Same Method | Non-Response Rate |           |
| Westerdahl et al <sup>1</sup> , 1996                | *                    | *                         | *                   | *                     | *                                                        | ...                                          | ...           | *           | ...               | 6         |
| Jensen et al <sup>2</sup> , 2008                    | *                    | *                         | *                   | *                     | ...                                                      | *                                            | *             | *           | *                 | 8         |
| de Vries et al <sup>5</sup> , 2012                  | *                    | *                         | *                   | *                     | *                                                        | ...                                          | ...           | *           | ...               | 6         |
| Friedman et al <sup>6</sup> , 2012                  | *                    | *                         | *                   | *                     | ...                                                      | ...                                          | *             | *           | *                 | 7         |
| Traianou et al <sup>7</sup> , 2012                  | *                    | *                         | *                   | *                     | ...                                                      | ...                                          | ...           | *           | ...               | 5         |
| Robinson et al <sup>8</sup> , 2013                  | *                    | *                         | *                   | *                     | *                                                        | ...                                          | ...           | *           | *                 | 7         |
| Schmidt et al <sup>9</sup> , 2015                   | *                    | *                         | *                   | *                     | ...                                                      | *                                            | *             | *           | *                 | 8         |
| Pottegård et al <sup>11</sup> , 2017                | *                    | *                         | *                   | *                     | ...                                                      | *                                            | *             | *           | *                 | 8         |
| Pedersen et al <sup>12</sup> , 2018                 | *                    | *                         | *                   | *                     | ...                                                      | *                                            | *             | *           | *                 | 8         |
| Pottegård et al <sup>13</sup> , 2018                | *                    | *                         | *                   | *                     | ...                                                      | *                                            | *             | *           | *                 | 8         |
| Pedersen et al <sup>16</sup> , 2019                 | *                    | *                         | *                   | *                     | ...                                                      | *                                            | *             | *           | *                 | 8         |
| Pottegård et al <sup>17</sup> , 2019                | *                    | *                         | *                   | *                     | ...                                                      | *                                            | *             | *           | *                 | 8         |
| Daniels et al <sup>18</sup> , 2020                  | *                    | *                         | *                   | *                     | *                                                        | *                                            | *             | *           | *                 | 9         |
| Morales et al <sup>21</sup> , 2020                  | *                    | *                         | *                   | *                     | ...                                                      | *                                            | *             | *           | *                 | 8         |
| Adalsteinsson et al <sup>24</sup> , 2021            | *                    | *                         | *                   | *                     | ...                                                      | ...                                          | *             | *           | *                 | 7         |
| Habel et al <sup>28</sup> , 2021                    | *                    | *                         | *                   | *                     | ...                                                      | ...                                          | *             | *           | *                 | 7         |
| León-Muñoz et al <sup>30</sup> , SIDIAP cohort 2021 | *                    | *                         | *                   | *                     | ...                                                      | *                                            | *             | *           | *                 | 8         |
| León-Muñoz et al <sup>30</sup> , BIFAP cohort 2021  | *                    | *                         | *                   | *                     | ...                                                      | *                                            | *             | *           | *                 | 8         |

<sup>†</sup>Study control for 3 of additional factors: sex, race/ethnic, skin tanning, smoking, alcohol consumption, precancerous skin conditions, comorbidities, photosensitizing drugs, medications with potential antineoplastic properties (e.g., aspirin, NSAIDs, statins), other antihypertensive agents, human papillomavirus; immunosuppression/immunosuppressive drugs, environmental hazards/occupational risks (e.g., exposure of arsenic, polycyclic aromatic hydrocarbons, nitrosamine, alkylating agents), and genetic predisposing factors (e.g., xeroderma pigmentosum).

Abbreviations: NOS, Newcastle-Ottawa Scale; NSAIDs, non-steroidal anti-inflammatory drugs.

**Table S8** Subgroup Analysis

| Subgroup Comparison           | No. of Studies (Ref)                                               | No. of Participants | Odds Ratio (95% CI) | P Value | Heterogeneity |         |                               |                |
|-------------------------------|--------------------------------------------------------------------|---------------------|---------------------|---------|---------------|---------|-------------------------------|----------------|
|                               |                                                                    |                     |                     |         | Q Statistic   | P Value | I <sup>2</sup> Index (95% CI) | τ <sup>2</sup> |
| Malignant melanoma            |                                                                    |                     |                     |         |               |         |                               |                |
| Individual thiazide diuretics |                                                                    |                     |                     |         |               |         |                               |                |
| Hydrochlorothiazide           | 11 (2, 13, 17, 18, 19, 21, 22, 28, 30, 31, 32)                     | 5001137             | 1.07 (1.00 – 1.15)  | 0.065   | 54.35         | <0.001  | 79.8% (63.1 – 87.0)           | 0.010          |
| Bendroflumethiazide           | 4 (2, 3, 5, 32)                                                    | 5315126             | 1.08 (0.97 – 1.21)  | 0.155   | 4.79          | 0.188   | 37.4% (0.0 – 78.5)            | 0.005          |
| Mixed cases                   | 17 (1, 2, 3, 5, 9, 10, 13, 17, 18, 19, 21, 22, 26, 28, 30, 31, 32) | 10129196            | 1.10 (1.04 – 1.15)  | <0.001  | 63.94         | <0.001  | 73.4% (54.8 – 82.2)           | 0.005          |
| Sample size                   |                                                                    |                     |                     |         |               |         |                               |                |
| <10,000                       | 3 (1, 2, 5)                                                        | 7868                | 1.22 (1.05 – 1.40)  | 0.008   | 0.17          | 0.919   | 0.0% (0.0 – 72.9)             | <0.001         |
| ≥10,000                       | 14 (3, 9, 10, 13, 17, 18, 19, 21, 22, 26, 28, 30, 31, 32)          | 10121328            | 1.09 (1.03 – 1.15)  | 0.002   | 61.3          | <0.001  | 77.2% (60.3 – 84.9)           | 0.006          |
| Study design                  |                                                                    |                     |                     |         |               |         |                               |                |
| Case-control                  | 10 (1, 2, 5, 9, 13, 17, 18, 21, 28, 30)                            | 978532              | 1.12 (1.06 – 1.19)  | <0.001  | 30.17         | 0.001   | 66.8% (25.0 – 80.9)           | 0.005          |
| Cohort                        | 7 (3, 10, 19, 22, 26, 31, 32)                                      | 9150664             | 1.07 (0.92 – 1.23)  | 0.384   | 23.44         | 0.001   | 74.4% (30.4 – 86.3)           | 0.021          |
| Study location                |                                                                    |                     |                     |         |               |         |                               |                |
| European                      | 9 (1, 2, 3, 9, 13, 21, 30, 31, 32)                                 | 5981640             | 1.13 (1.08 – 1.19)  | <0.001  | 28.11         | 0.001   | 68.0% (24.4 – 81.9)           | 0.003          |
| North America                 | 3 (10, 26, 28)                                                     | 597196              | 1.22 (0.98 – 1.52)  | 0.078   | 4.14          | 0.126   | 51.7% (0.0 – 84.9)            | 0.020          |
| International/Other           | 5 (5, 17, 18, 19, 22)                                              | 3550360             | 0.99 (0.85 – 1.15)  | 0.918   | 12.53         | 0.014   | 68.1% (0.0 – 85.6)            | 0.017          |

Abbreviations: CI, confidence interval; NA, not applicable.

**Table S8** Subgroup Analysis (Continued)

| Subgroup Comparison           | No. of Studies (Ref)                                   | No. of Participants | Odds Ratio (95% CI) | P Value | Heterogeneity |         |                               |                |
|-------------------------------|--------------------------------------------------------|---------------------|---------------------|---------|---------------|---------|-------------------------------|----------------|
|                               |                                                        |                     |                     |         | Q Statistic   | P Value | I <sup>2</sup> Index (95% CI) | τ <sup>2</sup> |
| Basal cell carcinoma          |                                                        |                     |                     |         |               |         |                               |                |
| Individual thiazide diuretics |                                                        |                     |                     |         |               |         |                               |                |
| Hydrochlorothiazide           | 9 (2, 12, 20, 21, 24, 27, 30, 31, 32)                  | 14755829            | 1.05 (1.01 – 1.10)  | 0.020   | 54.22         | <0.001  | 85.2% (72.7 – 90.6)           | 0.002          |
| Bendroflumethiazide           | 4 (2, 3, 5, 32)                                        | 5340507             | 1.05 (1.01 – 1.09)  | 0.014   | 5.50          | 0.139   | 45.4% (0.0 – 80.6)            | 0.001          |
| Mixed cases                   | 14 (2, 3, 4, 5, 9, 10, 12, 20, 21, 24, 27, 30, 31, 32) | 19780476            | 1.05 (1.02 – 1.09)  | 0.003   | 101.43        | <0.001  | 87.2% (80.3 – 90.9)           | 0.003          |
| Sample size                   |                                                        |                     |                     |         |               |         |                               |                |
| <10,000                       | 3 (2, 5, 20)                                           | 34837               | 1.01 (0.80 – 1.29)  | 0.913   | 4.38          | 0.112   | 54.3% (0.0 – 85.5)            | 0.026          |
| ≥10,000                       | 11 (3, 4, 9, 10, 12, 21, 24, 27, 30, 31, 32)           | 19745639            | 1.06 (1.02 – 1.10)  | 0.002   | 96.42         | <0.001  | 89.6% (83.8 – 92.7)           | 0.003          |
| Study design                  |                                                        |                     |                     |         |               |         |                               |                |
| Case-control                  | 7 (2, 5, 9, 12, 21, 24, 30)                            | 3934790             | 1.07 (1.04 – 1.09)  | <0.001  | 7.98          | 0.239   | 24.8% (0.0 – 68.0)            | <0.001         |
| Cohort                        | 7 (3, 4, 10, 20, 27, 31, 32)                           | 15845686            | 1.04 (0.98 – 1.10)  | 0.196   | 70.84         | <0.001  | 91.5% (85.5 – 94.3)           | 0.004          |
| Study location                |                                                        |                     |                     |         |               |         |                               |                |
| European                      | 11 (2, 3, 4, 9, 12, 20, 21, 24, 30, 31, 32)            | 9294649             | 1.05 (1.03 – 1.08)  | <0.001  | 22.59         | 0.012   | 55.7% (0.0 – 75.9)            | 0.001          |
| North America                 | 2 (10, 27)                                             | 10483306            | 1.43 (0.68 – 2.99)  | 0.348   | 28.38         | <0.001  | 96.5% (NA)                    | 0.276          |
| International/Other           | 1 (5)                                                  | 2521                | 1.27 (0.92 – 1.75)  | 0.145   | NA            | NA      | NA                            | NA             |

Abbreviations: CI, confidence interval; NA, not applicable.

**Table S8** Subgroup Analysis (Continued)

| Subgroup Comparison           | No. of Studies (Ref)                                           | No. of Participants | Odds Ratio (95% CI) | P Value | Heterogeneity |         |                               |                |
|-------------------------------|----------------------------------------------------------------|---------------------|---------------------|---------|---------------|---------|-------------------------------|----------------|
|                               |                                                                |                     |                     |         | Q Statistic   | P Value | I <sup>2</sup> Index (95% CI) | τ <sup>2</sup> |
| Squamous cell carcinoma       |                                                                |                     |                     |         |               |         |                               |                |
| Individual thiazide diuretics |                                                                |                     |                     |         |               |         |                               |                |
| Hydrochlorothiazide           | 11 (2, 8, 12, 20, 21, 24, 25, 27, 30, 31, 32)                  | 11510080            | 1.48 (1.18 – 1.84)  | 0.001   | 1052.71       | <0.001  | 99.1% (0.0 – 99.9)            | 0.125          |
| Bendroflumethiazide           | 4 (2, 3, 5, 32)                                                | 5315770             | 1.09 (0.97 – 1.22)  | 0.157   | 6.42          | 0.093   | 53.3% (0.0 – 82.7)            | 0.007          |
| Mixed cases                   | 16 (2, 3, 5, 8, 9, 10, 12, 15, 20, 21, 24, 25, 27, 30, 31, 32) | 16387862            | 1.35 (1.22 – 1.48)  | <0.001  | 511.45        | <0.001  | 97.1% (96.5 – 97.5)           | 0.028          |
| Sample size                   |                                                                |                     |                     |         |               |         |                               |                |
| <10,000                       | 4 (2, 5, 8, 20)                                                | 13605               | 1.46 (1.15 – 1.86)  | 0.002   | 5.78          | 0.123   | 48.1% (0.0 – 81.3)            | 0.028          |
| ≥10,000                       | 12 (3, 9, 10, 12, 15, 21, 24, 25, 27, 30, 31, 32)              | 16374257            | 1.32 (1.19 – 1.47)  | <0.001  | 502.60        | <0.001  | 97.8% (97.4 – 98.1)           | 0.028          |
| Study design                  |                                                                |                     |                     |         |               |         |                               |                |
| Case-control                  | 8 (2, 5, 8, 9, 12, 21, 24, 30)                                 | 454017              | 1.31 (1.11 – 1.54)  | 0.001   | 100.78        | <0.001  | 93.1% (89.2 – 95.1)           | 0.045          |
| Cohort                        | 8 (3, 10, 15, 20, 25, 27, 31, 32)                              | 15933845            | 1.36 (1.21 – 1.54)  | <0.001  | 283.39        | <0.001  | 97.5% (96.8 – 98.0)           | 0.020          |
| Study location                |                                                                |                     |                     |         |               |         |                               |                |
| European                      | 11 (2, 3, 9, 12, 20, 21, 24, 25, 30, 31, 32)                   | 5870735             | 1.33 ( 1.18 – 1.49) | <0.001  | 189.90        | <0.001  | 94.7% (92.8 – 95.9)           | 0.031          |
| North America                 | 4 (8, 10, 15, 27)                                              | 10515168            | 1.37 (1.11 – 1.70)  | 0.004   | 51.41         | <0.001  | 94.2% (88.8 – 96.3)           | 0.031          |
| International/Other           | 1 (5)                                                          | 1959                | 1.66 (1.16 – 2.37)  | 0.005   | NA            | NA      | NA                            | NA             |

Abbreviations: CI, confidence interval; NA, not applicable.



**Table S8** Subgroup Analysis (Continued)

| Subgroup Comparison                    | No. of Studies (Ref)       | No. of Participants | Odds Ratio (95% CI) | P Value | Heterogeneity |         |                               |                |
|----------------------------------------|----------------------------|---------------------|---------------------|---------|---------------|---------|-------------------------------|----------------|
|                                        |                            |                     |                     |         | Q Statistic   | P Value | I <sup>2</sup> Index (95% CI) | τ <sup>2</sup> |
| Non-melanoma skin cancer (unspecified) |                            |                     |                     |         |               |         |                               |                |
| Individual thiazide diuretics          |                            |                     |                     |         |               |         |                               |                |
| Hydrochlorothiazide                    | 5 (17, 19, 22, 29, 30)     | 5406162             | 1.08 (1.02 – 1.13)  | 0.005   | 34.43         | <0.001  | 85.5% (67.2 – 91.6)           | 0.002          |
| Bendroflumethiazide                    | NA                         | NA                  | NA                  | NA      | NA            | NA      | NA                            | NA             |
| Mixed cases                            | 6 (17, 19, 22, 26, 29, 30) | 5668737             | 1.08 (1.03 – 1.12)  | 0.001   | 35.38         | <0.001  | 83.0% (62.5 – 90.1)           | 0.002          |
| Sample size                            |                            |                     |                     |         |               |         |                               |                |
| <10,000                                | NA                         | NA                  | NA                  | NA      | NA            | NA      | NA                            | NA             |
| ≥10,000                                | 6 (17, 19, 22, 26, 29, 30) | 5668737             | 1.08 (1.03 – 1.12)  | 0.001   | 35.38         | <0.001  | 83.0% (62.5 – 90.1)           | 0.002          |
| Study design                           |                            |                     |                     |         |               |         |                               |                |
| Case-control                           | 2 (17, 30)                 | 1416526             | 1.12 (1.09 – 1.14)  | <0.001  | 3.15          | 0.207   | 36.5% (0.0 – 81.6)            | <0.001         |
| Cohort                                 | 4 (19, 22, 26, 29)         | 4252211             | 1.03 (0.93 – 1.15)  | 0.521   | 13.52         | 0.004   | 77.8% (0.0 – 89.9)            | 0.007          |
| Study location                         |                            |                     |                     |         |               |         |                               |                |
| European                               | 1 (30)                     | 1155793             | 1.12 (1.09 – 1.15)  | <0.001  | 2.11          | 0.146   | 52.6% (NA)                    | <0.001         |
| North America                          | 1 (26)                     | 262575              | 1.08 (1.03 – 1.14)  | 0.003   | NA            | NA      | NA                            | NA             |
| International/Other                    | 4 (17, 19, 22, 29)         | 4250369             | 1.05 (0.93 – 1.17)  | 0.442   | 19.95         | <0.001  | 85.0% (51.0 – 92.4)           | 0.009          |

Abbreviations: CI, confidence interval; NA, not applicable.

**Table S9** Sensitivity Analysis: Restricted the Analysis to the Highest-Quality Study (NOS  $\geq 8$  Points)

| Skin Cancer                                       | No. of Studies (Ref)                                  | No. of Participants | Odds Ratio (95% CI) | P Value | Heterogeneity |         |                               |                |
|---------------------------------------------------|-------------------------------------------------------|---------------------|---------------------|---------|---------------|---------|-------------------------------|----------------|
|                                                   |                                                       |                     |                     |         | Q Statistic   | P Value | I <sup>2</sup> Index (95% CI) | τ <sup>2</sup> |
| Primary outcomes                                  |                                                       |                     |                     |         |               |         |                               |                |
| Malignant melanoma (all subtype)                  | 13 (2, 9, 10, 13, 17, 18, 19, 21, 22, 26, 30, 31, 32) | 5090672             | 1.10 (1.04 – 1.15)  | 0.006   | 60.81         | <0.001  | 78.6% (62.6 – 85.9)           | 0.007          |
| Non-melanoma skin cancer: basal cell carcinoma    | 9 (2, 9, 10, 12, 21, 27, 30, 31, 32)                  | 14951026            | 1.06 (1.02 – 1.11)  | 0.004   | 91.24         | <0.001  | 91.2% (86.1 – 93.9)           | 0.003          |
| Non-melanoma skin cancer: squamous cell carcinoma | 11 (2, 9, 10, 12, 15, 21, 25, 27, 30, 31, 32)         | 11593636            | 1.36 (1.22 – 1.52)  | <0.001  | 499.95        | <0.001  | 98.0% (97.6 – 98.3)           | 0.028          |
| Non-melanoma skin cancer: Unspecified             | 6 (17, 19, 22, 26, 29, 30)                            | 5668737             | 1.08 (1.03 – 1.12)  | 0.001   | 35.38         | <0.001  | 83.0% (62.5 – 90.1)           | 0.002          |
| Secondary outcomes                                |                                                       |                     |                     |         |               |         |                               |                |
| Lip cancer                                        | 4 (11, 17, 18, 21)                                    | 137875              | 1.81 (1.28 – 2.55)  | 0.001   | 7.27          | 0.064   | 58.7% (0.0 – 84.2)            | 0.068          |
| Merkel cell carcinoma                             | 1 (16)                                                | 1954                | 1.00 (0.58 – 1.73)  | 1.000   | NA            | NA      | NA                            | NA             |
| Malignant adnexal skin tumors                     | 1 (16)                                                | 2752                | 1.40 (0.86 – 2.29)  | 0.179   | NA            | NA      | NA                            | NA             |
| Oral cavity cancer                                | 1 (21)                                                | 73844               | 0.90 (0.60 – 1.36)  | 0.614   | NA            | NA      | NA                            | NA             |
| Actinic keratosis                                 | NA                                                    | NA                  | NA                  | NA      | NA            | NA      | NA                            | NA             |

Abbreviations: CI, confidence interval; NA, not applicable; NOS, Newcastle-Ottawa scale.

**Table S10** Sensitivity Analysis: Excluding Studies that Included Patients Who Underwent Organ Transplantation

| Skin Cancer                                       | No. of Studies (Ref)                                           | No. of Participants | Odds Ratio (95% CI) | P Value | Heterogeneity |         |                               |                |
|---------------------------------------------------|----------------------------------------------------------------|---------------------|---------------------|---------|---------------|---------|-------------------------------|----------------|
|                                                   |                                                                |                     |                     |         | Q Statistic   | P Value | I <sup>2</sup> Index (95% CI) | τ <sup>2</sup> |
| Primary outcomes                                  |                                                                |                     |                     |         |               |         |                               |                |
| Malignant melanoma (all subtype)                  | 16 (1, 2, 3, 5, 9, 10, 13, 17, 18, 19, 21, 22, 26, 28, 30, 32) | 10088170            | 1.10 (1.04 – 1.15)  | <0.001  | 59.80         | <0.001  | 73.2% (53.5 – 82.3)           | 0.005          |
| Non-melanoma skin cancer: basal cell carcinoma    | 11 (2, 3, 4, 5, 9, 10, 12, 21, 24, 30, 32)                     | 9314312             | 1.06 (1.03 – 1.10)  | <0.001  | 43.10         | <0.001  | 76.8% (54.1 – 85.7)           | 0.002          |
| Non-melanoma skin cancer: squamous cell carcinoma | 13 (2, 3, 5, 8, 9, 10, 12, 15, 21, 24, 25, 30, 32)             | 5921698             | 1.36 (1.22 – 1.51)  | <0.001  | 219.77        | <0.001  | 94.5% (92.7 – 95.7)           | 0.029          |
| Non-melanoma skin cancer: Unspecified             | 5 (17, 19, 22, 26, 30)                                         | 5544251             | 1.07 (1.03 – 1.12)  | 0.034   | 32.92         | <0.001  | 84.8% (64.9 – 91.2)           | 0.002          |
| Secondary outcomes                                |                                                                |                     |                     |         |               |         |                               |                |
| Lip cancer                                        | 5 (6, 11, 17, 18, 21)                                          | 161491              | 1.92 (1.52 – 2.42)  | <0.001  | 8.25          | 0.083   | 51.5% (0.0 – 80.3)            | 0.032          |
| Merkel cell carcinoma                             | 1 (16)                                                         | 1954                | 1.00 (0.58 – 1.73)  | 1.000   | NA            | NA      | NA                            | NA             |
| Malignant adnexal skin tumors                     | 1 (16)                                                         | 2752                | 1.40 (0.86 – 2.29)  | 0.179   | NA            | NA      | NA                            | NA             |
| Oral cavity cancer                                | 1 (21)                                                         | 73844               | 0.90 (0.60 – 1.36)  | 0.614   | NA            | NA      | NA                            | NA             |
| Actinic keratosis                                 | 1 (7)                                                          | 1029                | 3.18 (1.93 – 5.25)  | <0.001  | NA            | NA      | NA                            | NA             |

Abbreviations: CI, confidence interval; NA, not applicable; NOS, Newcastle-Ottawa scale.

**Table S11** Sensitivity Analysis: Adding Unpublished Studies

| Skin Cancer                                       | No. of Studies (Ref)                                               | No. of Participants | Odds Ratio (95% CI) | P Value | Heterogeneity |         |                               |                |
|---------------------------------------------------|--------------------------------------------------------------------|---------------------|---------------------|---------|---------------|---------|-------------------------------|----------------|
|                                                   |                                                                    |                     |                     |         | Q Statistic   | P Value | I <sup>2</sup> Index (95% CI) | τ <sup>2</sup> |
| Primary outcomes                                  |                                                                    |                     |                     |         |               |         |                               |                |
| Malignant melanoma (all subtype)                  | NA                                                                 | NA                  | NA                  | NA      | NA            | NA      | NA                            | NA             |
| Non-melanoma skin cancer: basal cell carcinoma    | NA                                                                 | NA                  | NA                  | NA      | NA            | NA      | NA                            | NA             |
| Non-melanoma skin cancer: squamous cell carcinoma | 17 (2, 3, 5, 8, 9, 10, 12, 14, 15, 20, 21, 24, 25, 27, 30, 31, 32) | 16388794            | 1.35 (1.23 – 1.48)  | <0.001  | 513.12        | <0.001  | 96.9% (96.3 – 97.4)           | 0.028          |
| Non-melanoma skin cancer: Unspecified             | 6 (17, 19, 22, 23, 26, 29, 30)                                     | 5721562             | 1.07 (1.02 – 1.11)  | 0.002   | 47.51         | <0.001  | 85.3% (71.3 – 90.8)           | 0.002          |
| Secondary outcomes                                |                                                                    |                     |                     |         |               |         |                               |                |
| Lip cancer                                        | NA                                                                 | NA                  | NA                  | NA      | NA            | NA      | NA                            | NA             |
| Merkel cell carcinoma                             | NA                                                                 | NA                  | NA                  | NA      | NA            | NA      | NA                            | NA             |
| Malignant adnexal skin tumors                     | NA                                                                 | NA                  | NA                  | NA      | NA            | NA      | NA                            | NA             |
| Oral cavity cancer                                | NA                                                                 | NA                  | NA                  | NA      | NA            | NA      | NA                            | NA             |
| Actinic keratosis                                 | NA                                                                 | NA                  | NA                  | NA      | NA            | NA      | NA                            | NA             |

Abbreviations: CI, confidence interval; NA, not applicable.

**Table S12** Sensitivity Analysis: Outcomes After Removing Individuals Studies

| Author, Year                                        | Odds Ratio (95% CI)              |                                                |
|-----------------------------------------------------|----------------------------------|------------------------------------------------|
|                                                     | Malignant Melanoma (All Subtype) | Non-melanoma Skin Cancer: Basal Cell Carcinoma |
| <b>Overall</b>                                      | <b>1.10 (1.04 – 1.15)</b>        | <b>1.05 (1.02 – 1.09)</b>                      |
| Westerdahl et al <sup>1</sup> , 1996                | 1.10 (1.04 – 1.15)               | NA                                             |
| Jensen et al <sup>2</sup> , 2008                    | 1.09 (1.04 – 1.15)               | 1.06 (1.02 – 1.10)                             |
| Kaae et al <sup>3</sup> , 2010                      | 1.09 (1.04 – 1.15)               | 1.06 (1.02 – 1.10)                             |
| Ruiter et al <sup>4</sup> , 2010                    | NA                               | 1.06 (1.02 – 1.10)                             |
| de Vries et al <sup>5</sup> , 2012                  | 1.10 (1.04 – 1.15)               | 1.05 (1.02 – 1.09)                             |
| Friedman et al <sup>6</sup> , 2012                  | NA                               | NA                                             |
| Traianou et al <sup>7</sup> , 2012                  | NA                               | NA                                             |
| Robinson et al <sup>8</sup> , 2013                  | NA                               | NA                                             |
| Schmidt et al <sup>9</sup> , 2015                   | 1.10 (1.04 – 1.16)               | 1.05 (1.02 – 1.09)                             |
| Nardone et al <sup>10</sup> , 2017                  | 1.09 (1.04 – 1.15)               | 1.04 (1.01 – 1.08)                             |
| Pottegård et al <sup>11</sup> , 2017                | NA                               | NA                                             |
| Pedersen et al <sup>12</sup> , 2018                 | NA                               | 1.05 (1.01 – 1.09)                             |
| Pottegård et al <sup>13</sup> , 2018                | 1.09 (1.03 – 1.15)               | NA                                             |
| Shaw et al <sup>14</sup> , 2018                     | NA                               | NA                                             |
| Su et al <sup>15</sup> , 2018                       | NA                               | NA                                             |
| Pedersen et al <sup>16</sup> , 2019                 | NA                               | NA                                             |
| Pottegård et al <sup>17</sup> , 2019                | 1.12 (1.06 – 1.17)               | NA                                             |
| Daniels et al <sup>18</sup> , 2020                  | 1.09 (1.04 – 1.15)               | NA                                             |
| Lee et al <sup>19</sup> , 2020                      | 1.10 (1.04 – 1.15)               | NA                                             |
| Letellier et al <sup>20</sup> , 2020                | NA                               | 1.06 (1.02 – 1.09)                             |
| Morales et al <sup>21</sup> , 2020                  | 1.10 (1.04 – 1.15)               | 1.05 (1.01 – 1.09)                             |
| Park et al <sup>22</sup> , 2020                     | 1.12 (1.06 – 1.17)               | NA                                             |
| Yeon et al <sup>23</sup> , 2020                     | NA                               | NA                                             |
| Adalsteinsson et al <sup>24</sup> , 2021            | NA                               | 1.05 (1.01 – 1.09)                             |
| de Haan-Du et al <sup>25</sup> , 2021               | NA                               | NA                                             |
| Drucker et al <sup>26</sup> , 2021                  | 1.09 (1.04 – 1.15)               | NA                                             |
| Eworuke et al <sup>27</sup> , 2021                  | NA                               | 1.06 (1.03 – 1.09)                             |
| Habel et al <sup>28</sup> , 2021                    | 1.10 (1.04 – 1.16)               | NA                                             |
| Kim et al <sup>29</sup> , 2021                      | NA                               | NA                                             |
| León-Muñoz et al <sup>30</sup> , SIDIAP cohort 2021 | 1.09 (1.03 – 1.14)               | NA                                             |
| León-Muñoz et al <sup>30</sup> , BIFAP cohort 2021  | 1.09 (1.04 – 1.15)               | 1.05 (1.01 – 1.09)                             |
| Rouette et al <sup>31</sup> , 2021                  | 1.10 (1.05 – 1.16)               | 1.06 (1.02 – 1.09)                             |
| Schneider et al <sup>32</sup> , 2021                | 1.10 (1.03 – 1.17)               | 1.05 (1.01 – 1.09)                             |

Abbreviations: BIFAP, Base de Datos para la Investigación Farmacoepidemiológica en Atención Primaria; CI, confidence interval; NA, not applicable; SIDIAP, Spain: Information System for Research in Primary Care.

**Table S12** Sensitivity Analysis: Outcomes After Removing Individuals Studies (Continued)

| Author, Year                                        | Odds Ratio (95% CI)                               |                                       |
|-----------------------------------------------------|---------------------------------------------------|---------------------------------------|
|                                                     | Non-melanoma Skin Cancer: Squamous Cell Carcinoma | Non-melanoma Skin Cancer: Unspecified |
| <b>Overall</b>                                      | <b>1.35 (1.22 – 1.48)</b>                         | <b>1.08 (1.03 – 1.12)</b>             |
| Westerdahl et al <sup>1</sup> , 1996                | NA                                                | NA                                    |
| Jensen et al <sup>2</sup> , 2008                    | 1.35 (1.22 – 1.50)                                | NA                                    |
| Kaae et al <sup>3</sup> , 2010                      | 1.37 (1.24 – 1.51)                                | NA                                    |
| Ruiter et al <sup>4</sup> , 2010                    | NA                                                | NA                                    |
| de Vries et al <sup>5</sup> , 2012                  | 1.33 (1.21 – 1.47)                                | NA                                    |
| Friedman et al <sup>6</sup> , 2012                  | NA                                                | NA                                    |
| Traianou et al <sup>7</sup> , 2012                  | NA                                                | NA                                    |
| Robinson et al <sup>8</sup> , 2013                  | 1.35 (1.22 – 1.48)                                | NA                                    |
| Schmidt et al <sup>9</sup> , 2015                   | 1.37 (1.24 – 1.52)                                | NA                                    |
| Nardone et al <sup>10</sup> , 2017                  | 1.30 (1.18 – 1.43)                                | NA                                    |
| Pottegård et al <sup>11</sup> , 2017                | NA                                                | NA                                    |
| Pedersen et al <sup>12</sup> , 2018                 | 1.29 (1.19 – 1.41)                                | NA                                    |
| Pottegård et al <sup>13</sup> , 2018                | NA                                                | NA                                    |
| Shaw et al <sup>14</sup> , 2018                     | NA                                                | NA                                    |
| Su et al <sup>15</sup> , 2018                       | 1.36 (1.23 – 1.51)                                | NA                                    |
| Pedersen et al <sup>16</sup> , 2019                 | NA                                                | NA                                    |
| Pottegård et al <sup>17</sup> , 2019                | NA                                                | 1.07 (1.01 – 1.13)                    |
| Daniels et al <sup>18</sup> , 2020                  | NA                                                | NA                                    |
| Lee et al <sup>19</sup> , 2020                      | NA                                                | 1.08 (1.04 – 1.13)                    |
| Letellier et al <sup>20</sup> , 2020                | 1.33 (1.21 – 1.46)                                | NA                                    |
| Morales et al <sup>21</sup> , 2020                  | 1.35 (1.22 – 1.49)                                | NA                                    |
| Park et al <sup>22</sup> , 2020                     | NA                                                | 1.11 (1.08 – 1.13)                    |
| Yeon et al <sup>23</sup> , 2020                     | NA                                                | NA                                    |
| Adalsteinsson et al <sup>24</sup> , 2021            | 1.36 (1.23 – 1.51)                                | NA                                    |
| de Haan-Du et al <sup>25</sup> , 2021               | 1.31 (1.19 – 1.44)                                | NA                                    |
| Drucker et al <sup>26</sup> , 2021                  | NA                                                | 1.07 (1.02 – 1.13)                    |
| Eworuke et al <sup>27</sup> , 2021                  | 1.38 (1.24 – 1.53)                                | NA                                    |
| Habel et al <sup>28</sup> , 2021                    | NA                                                | NA                                    |
| Kim et al <sup>29</sup> , 2020                      | NA                                                | 1.07 (1.03 – 1.12)                    |
| León-Muñoz et al <sup>30</sup> , SIDIAP cohort 2021 | NA                                                | 1.06 (1.01 – 1.12)                    |
| León-Muñoz et al <sup>30</sup> , BIFAP cohort 2021  | 1.35 (1.22 – 1.49)                                | 1.07 (1.01 – 1.13)                    |
| Rouette et al <sup>31</sup> , 2021                  | 1.34 (1.21 – 1.48)                                | NA                                    |
| Schneider et al <sup>32</sup> , 2021                | 1.39 (1.20 – 1.60)                                | NA                                    |

Abbreviations: BIFAP, Base de Datos para la Investigación Farmacoepidemiológica en Atención Primaria; CI, confidence interval; NA, not applicable; SIDIAP, Spain: Information System for Research in Primary Care.

**Table S13** Meta-Regression of Included Studies

| Covariate                                                           | Malignant Melanoma<br>(All Subtype)                                |                                     |              | Non-melanoma Skin Cancer:<br>Basal Cell Carcinoma      |                                    |         |
|---------------------------------------------------------------------|--------------------------------------------------------------------|-------------------------------------|--------------|--------------------------------------------------------|------------------------------------|---------|
|                                                                     | No. of Studies<br>(Reference)                                      | Odd Ratio<br>(95% CI) <sup>†</sup>  | P Value      | No. of Studies<br>(Reference)                          | Odd Ratio<br>(95% CI) <sup>†</sup> | P Value |
| <b>Risk of bias assessment</b>                                      |                                                                    |                                     |              |                                                        |                                    |         |
| NOS (per 1 point)                                                   | 17 (1, 2, 3, 5, 9, 10, 13, 17, 18, 19, 21, 22, 26, 28, 30, 31, 32) | 0.97<br>(0.84 – 1.11)               | 0.651        | 14 (2, 3, 4, 5, 9, 10, 12, 20, 21, 24, 27, 30, 31, 32) | 0.99<br>(0.90 – 1.09)              | 0.826   |
| <b>Study characteristics</b>                                        |                                                                    |                                     |              |                                                        |                                    |         |
| Sample size (<10,000 vs. ≥10,000)                                   | 17 (1, 2, 3, 5, 9, 10, 13, 17, 18, 19, 21, 22, 26, 28, 30, 31, 32) | 0.89<br>(0.69 – 1.14)               | 0.331        | 14 (2, 3, 4, 5, 9, 10, 12, 20, 21, 24, 27, 30, 31, 32) | 1.04<br>(0.85 – 1.26)              | 0.672   |
| Study design (case-control vs. cohort)                              | 17 (1, 2, 3, 5, 9, 10, 13, 17, 18, 19, 21, 22, 26, 28, 30, 31, 32) | 0.94<br>(0.81 – 1.09)               | 0.381        | 14 (2, 3, 4, 5, 9, 10, 12, 20, 21, 24, 27, 30, 31, 32) | 0.96<br>(0.87 – 1.06)              | 0.419   |
| Study locations<br>(European/North America vs. International/Other) | 17 (1, 2, 3, 5, 9, 10, 13, 17, 18, 19, 21, 22, 26, 28, 30, 31, 32) | <b>0.84</b><br><b>(0.74 – 0.96)</b> | <b>0.014</b> | 14 (2, 3, 4, 5, 9, 10, 12, 20, 21, 24, 27, 30, 31, 32) | 1.21<br>(0.66 – 2.23)              | 0.508   |
| <b>Baseline study level</b>                                         |                                                                    |                                     |              |                                                        |                                    |         |
| Age (mean, per 1 year)                                              | 10 (5, 17, 18, 19, 21, 22, 26, 30, 31, 32)                         | 1.01<br>(0.99 – 1.02)               | 0.247        | 10 (4, 5, 12, 20, 21, 24, 27, 30, 31, 32)              | 1.00<br>(0.99 – 1.01)              | 0.286   |
| Female sex (per %)                                                  | 13 (5, 9, 10, 17, 18, 19, 21, 22, 26, 28, 30, 31, 32)              | 1.00<br>(0.99 – 1.01)               | 0.734        | 12 (4, 5, 9, 10, 12, 20, 21, 24, 27, 30, 31, 32)       | 1.01<br>(0.99 – 1.03)              | 0.154   |
| Thiazide diuretics<br>utilization (per %)                           | 16 (1, 2, 5, 9, 10, 13, 17, 18, 19, 21, 22, 26, 28, 30, 31, 32)    | 1.00<br>(0.99 – 1.00)               | 0.124        | 12 (2, 5, 9, 10, 12, 20, 21, 24, 27, 30, 31, 32)       | 1.00<br>(0.99 – 1.00)              | 0.411   |
| Immunosuppressant (per %)                                           | 10 (5, 13, 18, 19, 21, 22, 26, 30, 31, 32)                         | 0.90<br>(0.78 – 1.03)               | 1.09         | 9 (5, 12, 20, 21, 24, 27, 30, 31, 32)                  | 1.00<br>(1.00 – 1.00)              | 0.910   |
| RAS inhibitors (per %)                                              | 6 (9, 10, 18, 30, 31, 32)                                          | 1.00<br>(0.99 – 1.01)               | 0.882        | 6 (9, 10, 27, 30, 31, 32)                              | 0.99<br>(0.98 – 1.01)              | 0.213   |
| NSAIDs (per %)                                                      | 9 (5, 9, 17, 18, 19, 21, 30, 31, 32)                               | 1.00<br>(0.99 – 1.00)               | 0.124        | 7 (5, 9, 12, 21, 30, 31, 32)                           | 1.00<br>(1.00 – 1.00)              | 0.793   |

<sup>†</sup>Effect size for each variable of interest reflecting unit change.

Abbreviations: CI, confidence interval; NOS, Newcastle-Ottawa scale; NSAIDs, non-steroidal anti-inflammatory drugs; RAS, renin-angiotensin system.

**Table S13** Meta-Regression of Included Studies

| Covariate                                                            | Non-melanoma Skin Cancer:<br>Squamous Cell Carcinoma           |                                    |                | Non-melanoma Skin Cancer: Unspecified |                                     |                |
|----------------------------------------------------------------------|----------------------------------------------------------------|------------------------------------|----------------|---------------------------------------|-------------------------------------|----------------|
|                                                                      | No. of Studies<br>(Reference)                                  | Odd Ratio<br>(95% CI) <sup>†</sup> | <i>P</i> Value | No. of Studies<br>(Reference)         | Odd Ratio<br>(95% CI) <sup>†</sup>  | <i>P</i> Value |
| <b>Risk of bias assessment</b>                                       |                                                                |                                    |                |                                       |                                     |                |
| NOS (per 1 point)                                                    | 16 (2, 3, 5, 8, 9, 10, 12, 15, 20, 21, 24, 27, 29, 30, 31, 32) | 0.96<br>(0.73 – 1.25)              | 0.721          | 6 (17, 19, 22, 26, 29, 30)            | NA                                  | NA             |
| <b>Study characteristics</b>                                         |                                                                |                                    |                |                                       |                                     |                |
| Sample size (<10,000 vs. ≥10,000)                                    | 16 (2, 3, 5, 8, 9, 10, 12, 15, 20, 21, 24, 25, 27, 30, 31, 32) | 0.90<br>(0.58 – 1.41)              | 0.633          | 6 (17, 19, 22, 26, 29, 30)            | NA                                  | NA             |
| Study design (case-control vs. cohort)                               | 16 (2, 3, 5, 8, 9, 10, 12, 15, 20, 21, 24, 25, 27, 30, 31, 32) | 1.12<br>(0.79 – 1.59)              | 0.509          | 6 (17, 19, 22, 26, 29, 30)            | 0.92<br>(0.82 – 1.04)               | 0.146          |
| Study locations (European vs. North America vs. International/Other) | 16 (2, 3, 5, 8, 9, 10, 12, 15, 20, 21, 24, 25, 27, 30, 31, 32) | 1.21<br>(0.55 – 2.69)              | 0.613          | 6 (17, 19, 22, 26, 29, 30)            | 0.94<br>(0.81 – 1.09)               | 0.319          |
| <b>Baseline study level</b>                                          |                                                                |                                    |                |                                       |                                     |                |
| Age (mean, per 1 year)                                               | 11 (5, 12, 15, 20, 21, 24, 25, 27, 30, 31, 32)                 | 1.00<br>(0.98 – 1.02)              | 0.736          | 5 (17, 19, 22, 26, 30)                | <b>1.01</b><br><b>(1.00 – 1.01)</b> | <b>0.010</b>   |
| Female sex (per %)                                                   | 14 (5, 8, 9, 10, 12, 15, 20, 21, 24, 25, 27, 30, 31, 32)       | 1.01<br>(0.98 – 1.04)              | 0.565          | 6 (17, 19, 22, 26, 29, 30)            | 1.00<br>(0.99 – 1.02)               | 0.669          |
| Thiazide diuretics utilization (per %)                               | 15 (2, 5, 8, 9, 10, 12, 15, 20, 21, 24, 25, 27, 30, 31, 32)    | 1.00<br>(0.99 – 1.01)              | 0.485          | 6 (17, 19, 22, 26, 29, 30)            | 1.00<br>(0.99 – 1.00)               | 0.148          |
| Immunosuppressant (per %)                                            | 9 (5, 12, 20, 21, 24, 27, 30, 31, 32)                          | 1.00<br>(0.99 – 1.01)              | 0.490          | 4 (19, 22, 26, 30)                    | NA                                  | NA             |
| RAS inhibitors (per %)                                               | 8 (9, 10, 15, 25, 27, 30, 31, 32)                              | 0.99<br>(0.97 – 1.01)              | 0.314          | 1 (30)                                | NA                                  | NA             |
| NSAIDs (per %)                                                       | 8 (5, 9, 12, 21, 25, 30, 31, 32)                               | 1.00<br>(0.99 – 1.01)              | 0.753          | 4 (17, 19, 29, 30)                    | 1.00<br>(0.99 – 1.01)               | 0.776          |

<sup>†</sup>Effect size for each variable of interest reflecting unit change.

Abbreviations: CI, confidence interval; NA, not applicable; NOS, Newcastle-Ottawa scale; NSAIDs, non-steroidal anti-inflammatory drugs; RAS, renin-angiotensin system.



**Table S14** Meta-Analysis of Included Studies with Calibration for Publication Bias<sup>†</sup>

| Skin Cancer                                             | No. of Studies<br>(Reference)                                               | P Value<br>for Begg's<br>Test | P Value<br>for Egger's<br>Test | Odds Ratio<br>(95% CI) | P Value | Heterogeneity |         |                                  |                |
|---------------------------------------------------------|-----------------------------------------------------------------------------|-------------------------------|--------------------------------|------------------------|---------|---------------|---------|----------------------------------|----------------|
|                                                         |                                                                             |                               |                                |                        |         | Q Statistic   | P Value | I <sup>2</sup> Index<br>(95% CI) | τ <sup>2</sup> |
| Primary outcomes                                        |                                                                             |                               |                                |                        |         |               |         |                                  |                |
| Malignant melanoma<br>(all subtype)                     | 17 (1, 2, 3, 5, 9,<br>10, 13, 17, 18, 19,<br>21, 22, 26, 28, 30,<br>31, 32) | 0.705                         | 0.463                          | 1.07<br>(1.02 – 1.12)  | 0.005   | 74.58         | <0.001  | 70.5%<br>(52.3 – 79.7)           | 0.006          |
| Non-melanoma skin<br>cancer: basal cell<br>carcinoma    | 14 (2, 3, 4, 5, 9,<br>10, 12, 20, 21, 24,<br>27, 30, 31, 32)                | 1.000                         | 0.282                          | Not detected           | NA      | NA            | NA      | NA                               | NA             |
| Non-melanoma skin<br>cancer: squamous cell<br>carcinoma | 16 (2, 3, 5, 8, 9,<br>10, 12, 15, 20, 21,<br>24, 25, 27, 30, 31,<br>32)     | 0.964                         | 0.212                          | Not detected           | NA      | NA            | NA      | NA                               | NA             |
| Non-melanoma skin<br>cancer: Unspecified                | 6 (17, 19, 22, 26,<br>29, 30)                                               | 0.368                         | 0.297                          | 1.07<br>(1.02 – 1.12)  | 0.002   | 39.03         | <0.001  | 82.1%<br>(62.3 – 89.2)           | 0.002          |
| Secondary outcomes                                      |                                                                             |                               |                                |                        |         |               |         |                                  |                |
| Lip cancer                                              | 5 (6, 11, 17, 18,<br>21)                                                    | 0.806                         | 0.625                          | 1.85<br>(1.48 – 2.32)  | <0.001  | 9.85          | 0.079   | 49.3%<br>(0.0 – 78.0)            | 0.034          |
| Merkel cell<br>carcinoma                                | 2 (3, 16)                                                                   | 1.000                         | NA                             | Not detected           | NA      | NA            | NA      | NA                               | NA             |
| Malignant adnexal<br>skin tumors                        | 1 (16)                                                                      | NA                            | NA                             | NA                     | NA      | NA            | NA      | NA                               | NA             |
| Oral cavity cancer                                      | 1 (21)                                                                      | NA                            | NA                             | NA                     | NA      | NA            | NA      | NA                               | NA             |
| Actinic keratosis                                       | 1 (7)                                                                       | NA                            | NA                             | NA                     | NA      | NA            | NA      | NA                               | NA             |

<sup>†</sup>Calibration for publication bias was carried out, if indicated in trim and fill analysis.

Abbreviations: CI, confidence interval; NA, not applicable.

**Table S15** Quality of Evidence Synthesis and GRADE Evidence Profile of Outcomes

| Outcomes                       | No. of Studies (Ref.)                                              | Study Design (Sample Size) | Quality Assessment: Required Domains |            |             |           |                | Other Issues                                                                                                                                                                                    | Finding and Direction (Magnitude) of Effect                                                                                                                                                                                                                                                                                                                                                                                                                                                     | Strength of Evidence     |
|--------------------------------|--------------------------------------------------------------------|----------------------------|--------------------------------------|------------|-------------|-----------|----------------|-------------------------------------------------------------------------------------------------------------------------------------------------------------------------------------------------|-------------------------------------------------------------------------------------------------------------------------------------------------------------------------------------------------------------------------------------------------------------------------------------------------------------------------------------------------------------------------------------------------------------------------------------------------------------------------------------------------|--------------------------|
|                                |                                                                    |                            | Study Limitations                    | Directions | Consistency | Precision | Reporting Bias |                                                                                                                                                                                                 |                                                                                                                                                                                                                                                                                                                                                                                                                                                                                                 |                          |
| Malignant melanoma             |                                                                    |                            |                                      |            |             |           |                |                                                                                                                                                                                                 |                                                                                                                                                                                                                                                                                                                                                                                                                                                                                                 |                          |
| All subtype                    | 17 (1, 2, 3, 5, 9, 10, 13, 17, 18, 19, 21, 22, 26, 28, 30, 31, 32) | Non-RCTs (10129196)        | High                                 | Direct     | Consistent  | Imprecise | Undetected     | <ul style="list-style-type: none"><li>• Dose-response association could not be determined</li></ul>                                                                                             | <ul style="list-style-type: none"><li>• Seventeen non-RCTs with a large sample size revealed high study limitations and imprecise based on the prediction interval (0.93 – 1.29).</li><li>• The summary pooled OR was 1.10 (95% CI, 1.04 – 1.15); <math>P&lt;0.001</math>.</li><li>• Weak strength of association (magnitude of effect) with moderate heterogeneity (<math>I^2</math> index=73.4%).</li><li>• The findings were robust with respect to a set of sensitivity analyses.</li></ul> | Very low (small harmful) |
| Superficial spreading melanoma | 3 (13, 18, 28)                                                     | Non-RCTs (221624)          | High                                 | Direct     | Unknown     | Imprecise | Suspected      | <ul style="list-style-type: none"><li>• Dose-response association could not be determined</li><li>• Present plausible confounding that would decrease the observed effect<sup>†</sup></li></ul> | <ul style="list-style-type: none"><li>• Three non-RCTs illustrated high study limitations and imprecise based on the prediction interval (0.35 – 4.02).</li><li>• The summary pooled OR was 1.18 (95% CI, 1.05 – 1.33); <math>P=0.006</math>.</li><li>• Weak strength of association (magnitude of effect) with low heterogeneity (<math>I^2</math> index=53.7%).</li><li>• Publication bias cannot be ruled out due to the small number of studies included.</li></ul>                         | Very low (small harmful) |

<sup>†</sup>On the basis of the E-value.

Abbreviations: CI, confidence interval; GRADE, Grading of Recommendations Assessment, Development and Evaluation; OR, odds ratio; RCTs, randomized-controlled trials.

**Table S15** Quality of Evidence Synthesis and GRADE Evidence Profile of Outcomes (Continued)

| Outcomes                       | No. of Studies (Ref.) | Study Design (Sample Size) | Quality Assessment: Required Domains |            |             |           |                | Other Issues                                                                                                                                                                                                                                                 | Finding and Direction (Magnitude) of Effect                                                                                                                                                                                                                                                                                                                                                                                                                                  | Strength of Evidence     |
|--------------------------------|-----------------------|----------------------------|--------------------------------------|------------|-------------|-----------|----------------|--------------------------------------------------------------------------------------------------------------------------------------------------------------------------------------------------------------------------------------------------------------|------------------------------------------------------------------------------------------------------------------------------------------------------------------------------------------------------------------------------------------------------------------------------------------------------------------------------------------------------------------------------------------------------------------------------------------------------------------------------|--------------------------|
|                                |                       |                            | Study Limitations                    | Directions | Consistency | Precision | Reporting Bias |                                                                                                                                                                                                                                                              |                                                                                                                                                                                                                                                                                                                                                                                                                                                                              |                          |
| Malignant melanoma (continued) |                       |                            |                                      |            |             |           |                |                                                                                                                                                                                                                                                              |                                                                                                                                                                                                                                                                                                                                                                                                                                                                              |                          |
| Nodular melanoma               | 3 (13, 18, 28)        | Non-RCTs (36631)           | High                                 | Direct     | Unknown     | Imprecise | Suspected      | <ul style="list-style-type: none"><li>• Dose-response association could not be determined</li><li>• Weak strength of association (magnitude of effect)</li><li>• Present plausible confounding that would decrease the observed effect<sup>†</sup></li></ul> | <ul style="list-style-type: none"><li>• Three non-RCTs illustrated high study limitations and imprecise based on the prediction interval (0.54 – 2.79).</li><li>• The summary pooled OR was 1.23 (95% CI, 1.08 – 1.40); <i>P</i>=0.001).</li><li>• Weak strength of association (magnitude of effect) with moderate heterogeneity (<i>I</i><sup>2</sup> index=0.0%).</li><li>• Publication bias cannot be ruled out due to the small number of studies included.</li></ul>   | Very low (small harmful) |
| Lentigo maligna melanoma       | 3 (13, 18, 28)        | Non-RCTs (21407)           | High                                 | Direct     | Unknown     | Imprecise | Suspected      | <ul style="list-style-type: none"><li>• Dose-response association could not be determined</li><li>• Present plausible confounding that would decrease the observed effect<sup>†</sup></li></ul>                                                              | <ul style="list-style-type: none"><li>• Three non-RCTs illustrated high study limitations and imprecise based on the prediction interval (0.18 – 10.09).</li><li>• The summary pooled OR was 1.33 (95% CI, 1.08 – 1.65); <i>P</i>=0.008).</li><li>• Weak strength of association (magnitude of effect) with moderate heterogeneity (<i>I</i><sup>2</sup> index=36.9%).</li><li>• Publication bias cannot be ruled out due to the small number of studies included.</li></ul> | Very low (small harmful) |

<sup>†</sup>On the basis of the E-value.

Abbreviations: CI, confidence interval; GRADE, Grading of Recommendations Assessment, Development and Evaluation; OR, odds ratio; RCTs, randomized-controlled trials.

**Table S15** Quality of Evidence Synthesis and GRADE Evidence Profile of Outcomes (Continued)

| Outcomes                 | No. of Studies (Ref.)                                          | Study Design (Sample Size) | Quality Assessment: Required Domains |            |             |           |                | Other Issues                                                                                        | Finding and Direction (Magnitude) of Effect                                                                                                                                                                                                                                                                                                                                                                                                                                              | Strength of Evidence     |
|--------------------------|----------------------------------------------------------------|----------------------------|--------------------------------------|------------|-------------|-----------|----------------|-----------------------------------------------------------------------------------------------------|------------------------------------------------------------------------------------------------------------------------------------------------------------------------------------------------------------------------------------------------------------------------------------------------------------------------------------------------------------------------------------------------------------------------------------------------------------------------------------------|--------------------------|
|                          |                                                                |                            | Study Limitations                    | Directions | Consistency | Precision | Reporting Bias |                                                                                                     |                                                                                                                                                                                                                                                                                                                                                                                                                                                                                          |                          |
| Non-melanoma skin cancer |                                                                |                            |                                      |            |             |           |                |                                                                                                     |                                                                                                                                                                                                                                                                                                                                                                                                                                                                                          |                          |
| Basal cell carcinoma     | 14 (2, 3, 4, 5, 9, 10, 12, 20, 21, 24, 27, 30, 31, 32)         | Non-RCTs (19780476)        | High                                 | Direct     | Consistent  | Imprecise | Undetected     | <ul style="list-style-type: none"><li>• Dose-response association could not be determined</li></ul> | <ul style="list-style-type: none"><li>• Fourteen non-RCTs with a large sample size revealed high study limitations and imprecise based on the prediction interval (0.94 – 1.19).</li><li>• The summary pooled OR was 1.05 (95% CI, 1.02 – 1.09); <i>P</i>=0.003).</li><li>• Weak strength of association (magnitude of effect) with high heterogeneity (<i>I</i><sup>2</sup> index=87.2%).</li><li>• The findings were robust with respect to a set of sensitivity analyses.</li></ul>   | Very low (small harmful) |
| Squamous cell carcinoma  | 16 (2, 3, 5, 8, 9, 10, 12, 15, 20, 21, 24, 25, 27, 30, 31, 32) | Non-RCTs (16387862)        | High                                 | Direct     | Consistent  | Imprecise | Undetected     | <ul style="list-style-type: none"><li>• Dose-response association could not be determined</li></ul> | <ul style="list-style-type: none"><li>• Sixteen non-RCTs with a large sample size revealed high study limitations and imprecise based on the prediction interval (0.93 – 1.95).</li><li>• The summary pooled OR was 1.35 (95% CI, 1.22 – 1.48); <i>P</i>&lt;0.001).</li><li>• Weak strength of association (magnitude of effect) with high heterogeneity (<i>I</i><sup>2</sup> index=97.1%).</li><li>• The findings were robust with respect to a set of sensitivity analyses.</li></ul> | Very low (small harmful) |

Abbreviations: CI, confidence interval; GRADE, Grading of Recommendations Assessment, Development and Evaluation; OR, odds ratio; RCTs, randomized-controlled trials.

**Table S15** Quality of Evidence Synthesis and GRADE Evidence Profile of Outcomes (Continued)

| Outcomes                             | No. of Studies (Ref.)      | Study Design (Sample Size) | Quality Assessment: Required Domains |            |             |           |                | Other Issues                                                                                                                                                                                    | Finding and Direction (Magnitude) of Effect                                                                                                                                                                                                                                                                                                                                                                                                                                       | Strength of Evidence     |
|--------------------------------------|----------------------------|----------------------------|--------------------------------------|------------|-------------|-----------|----------------|-------------------------------------------------------------------------------------------------------------------------------------------------------------------------------------------------|-----------------------------------------------------------------------------------------------------------------------------------------------------------------------------------------------------------------------------------------------------------------------------------------------------------------------------------------------------------------------------------------------------------------------------------------------------------------------------------|--------------------------|
|                                      |                            |                            | Study Limitations                    | Directions | Consistency | Precision | Reporting Bias |                                                                                                                                                                                                 |                                                                                                                                                                                                                                                                                                                                                                                                                                                                                   |                          |
| Non-melanoma skin cancer (continued) |                            |                            |                                      |            |             |           |                |                                                                                                                                                                                                 |                                                                                                                                                                                                                                                                                                                                                                                                                                                                                   |                          |
| Unspecified                          | 6 (17, 19, 22, 26, 29, 30) | Non-RCTs (5668737)         | High                                 | Direct     | Consistent  | Imprecise | Undetected     | <ul style="list-style-type: none"><li>• Dose-response association could not be determined</li></ul>                                                                                             | <ul style="list-style-type: none"><li>• Six non-RCTs with a large sample size revealed high study limitations and imprecise based on the prediction interval (0.94 – 1.23).</li><li>• The summary pooled OR was 1.08 (95% CI, 1.03 – 1.12); <i>P</i>=0.001).</li><li>• Weak strength of association (magnitude of effect) with high heterogeneity (<i>I</i><sup>2</sup> index=83.0%).</li><li>• The findings were robust with respect to a set of sensitivity analyses.</li></ul> | Very low (small harmful) |
| Secondary outcomes                   |                            |                            |                                      |            |             |           |                |                                                                                                                                                                                                 |                                                                                                                                                                                                                                                                                                                                                                                                                                                                                   |                          |
| Lip cancer                           | 5 (6, 11, 17, 18, 21)      | Non-RCTs (161491)          | High                                 | Direct     | Consistent  | Imprecise | Undetected     | <ul style="list-style-type: none"><li>• Dose-response association could not be determined</li><li>• Present plausible confounding that would decrease the observed effect<sup>†</sup></li></ul> | <ul style="list-style-type: none"><li>• Five non-RCTs illustrated high study limitations and imprecise based on the prediction interval (0.97 – 3.81).</li><li>• The summary pooled OR was 1.92 (95% CI, 1.52 – 2.42); <i>P</i>&lt;0.001).</li><li>• Weak strength of association (magnitude of effect) with moderate heterogeneity (<i>I</i><sup>2</sup> index=51.5%).</li></ul>                                                                                                 | Very low (small harmful) |
| MCC                                  | 2 (3, 16)                  | Non-RCTs (4763703)         | High                                 | Direct     | Unknown     | Unknown   | Suspected      | <ul style="list-style-type: none"><li>• Present plausible confounding that would decrease the observed effect<sup>†</sup></li></ul>                                                             | <ul style="list-style-type: none"><li>• Two non-RCTs with a large sample size illustrated high study limitations; however, the uncertainty in terms of prediction interval could not be estimated.</li><li>• The summary pooled OR was 0.98 (95% CI, 0.57 – 1.65); <i>P</i>=0.924).</li></ul>                                                                                                                                                                                     | Insufficient data        |

<sup>†</sup>On the basis of the E-value.

Abbreviations: CI, confidence interval; GRADE, Grading of Recommendations Assessment, Development and Evaluation; OR, odds ratio; RCTs, randomized-controlled trials.

**Table S15** Quality of Evidence Synthesis and GRADE Evidence Profile of Outcomes (Continued)

| Outcomes                       | No. of Studies (Ref.) | Study Design (Sample Size) | Quality Assessment: Required Domains |            |             |           |                | Other Issues                                                                                                                        | Finding and Direction (Magnitude) of Effect                                                                                                                                                                                                                                                                         | Strength of Evidence |
|--------------------------------|-----------------------|----------------------------|--------------------------------------|------------|-------------|-----------|----------------|-------------------------------------------------------------------------------------------------------------------------------------|---------------------------------------------------------------------------------------------------------------------------------------------------------------------------------------------------------------------------------------------------------------------------------------------------------------------|----------------------|
|                                |                       |                            | Study Limitations                    | Directions | Consistency | Precision | Reporting Bias |                                                                                                                                     |                                                                                                                                                                                                                                                                                                                     |                      |
| Secondary outcomes (continued) |                       |                            |                                      |            |             |           |                |                                                                                                                                     |                                                                                                                                                                                                                                                                                                                     |                      |
| MAST                           | 1 (16)                | Non-RCTs (2752)            | High                                 | Direct     | Unknown     | Unknown   | Suspected      | <ul style="list-style-type: none"><li>• Present plausible confounding that would decrease the observed effect<sup>†</sup></li></ul> | <ul style="list-style-type: none"><li>• A single study with a small sample size by Pedersen et al<sup>16</sup>, 2019 illustrated non-statistical significance (OR, 1.40; 95% CI, 0.86 – 2.29; <i>P</i>=0.179).</li><li>• However, the uncertainty in terms of prediction interval could not be estimated.</li></ul> | Insufficient data    |
| Oral cavity cancer             | 1 (21)                | Non-RCTs (73844)           | High                                 | Direct     | Unknown     | Unknown   | Suspected      | <ul style="list-style-type: none"><li>• Present plausible confounding that would decrease the observed effect<sup>†</sup></li></ul> | <ul style="list-style-type: none"><li>• A single study by Morales et al<sup>22</sup>, 2020 illustrated non-statistical significance (OR, 0.90; 95% CI, 0.60 – 1.36; <i>P</i>=0.614).</li><li>• However, the uncertainty in terms of prediction interval could not be estimated.</li></ul>                           | Insufficient data    |
| Actinic keratosis              | 1 (7)                 | Non-RCTs (1029)            | High                                 | Direct     | Unknown     | Unknown   | Suspected      | <ul style="list-style-type: none"><li>• Present plausible confounding that would decrease the observed effect<sup>†</sup></li></ul> | <ul style="list-style-type: none"><li>• A single study with a small sample size by Traianou et al<sup>7</sup>, 2012 illustrated statistical significance (OR, 3.18; 95% CI, 1.93 – 5.25; <i>P</i>&lt;0.001).</li><li>• However, the uncertainty in terms of prediction interval could not be estimated.</li></ul>   | Insufficient data    |

<sup>†</sup>On the basis of the E-value.

Abbreviations: CI, confidence interval; GRADE, Grading of Recommendations Assessment, Development and Evaluation; OR, odds ratio; RCTs, randomized-controlled trials.

**Figure S1** Study Selection Flowchart

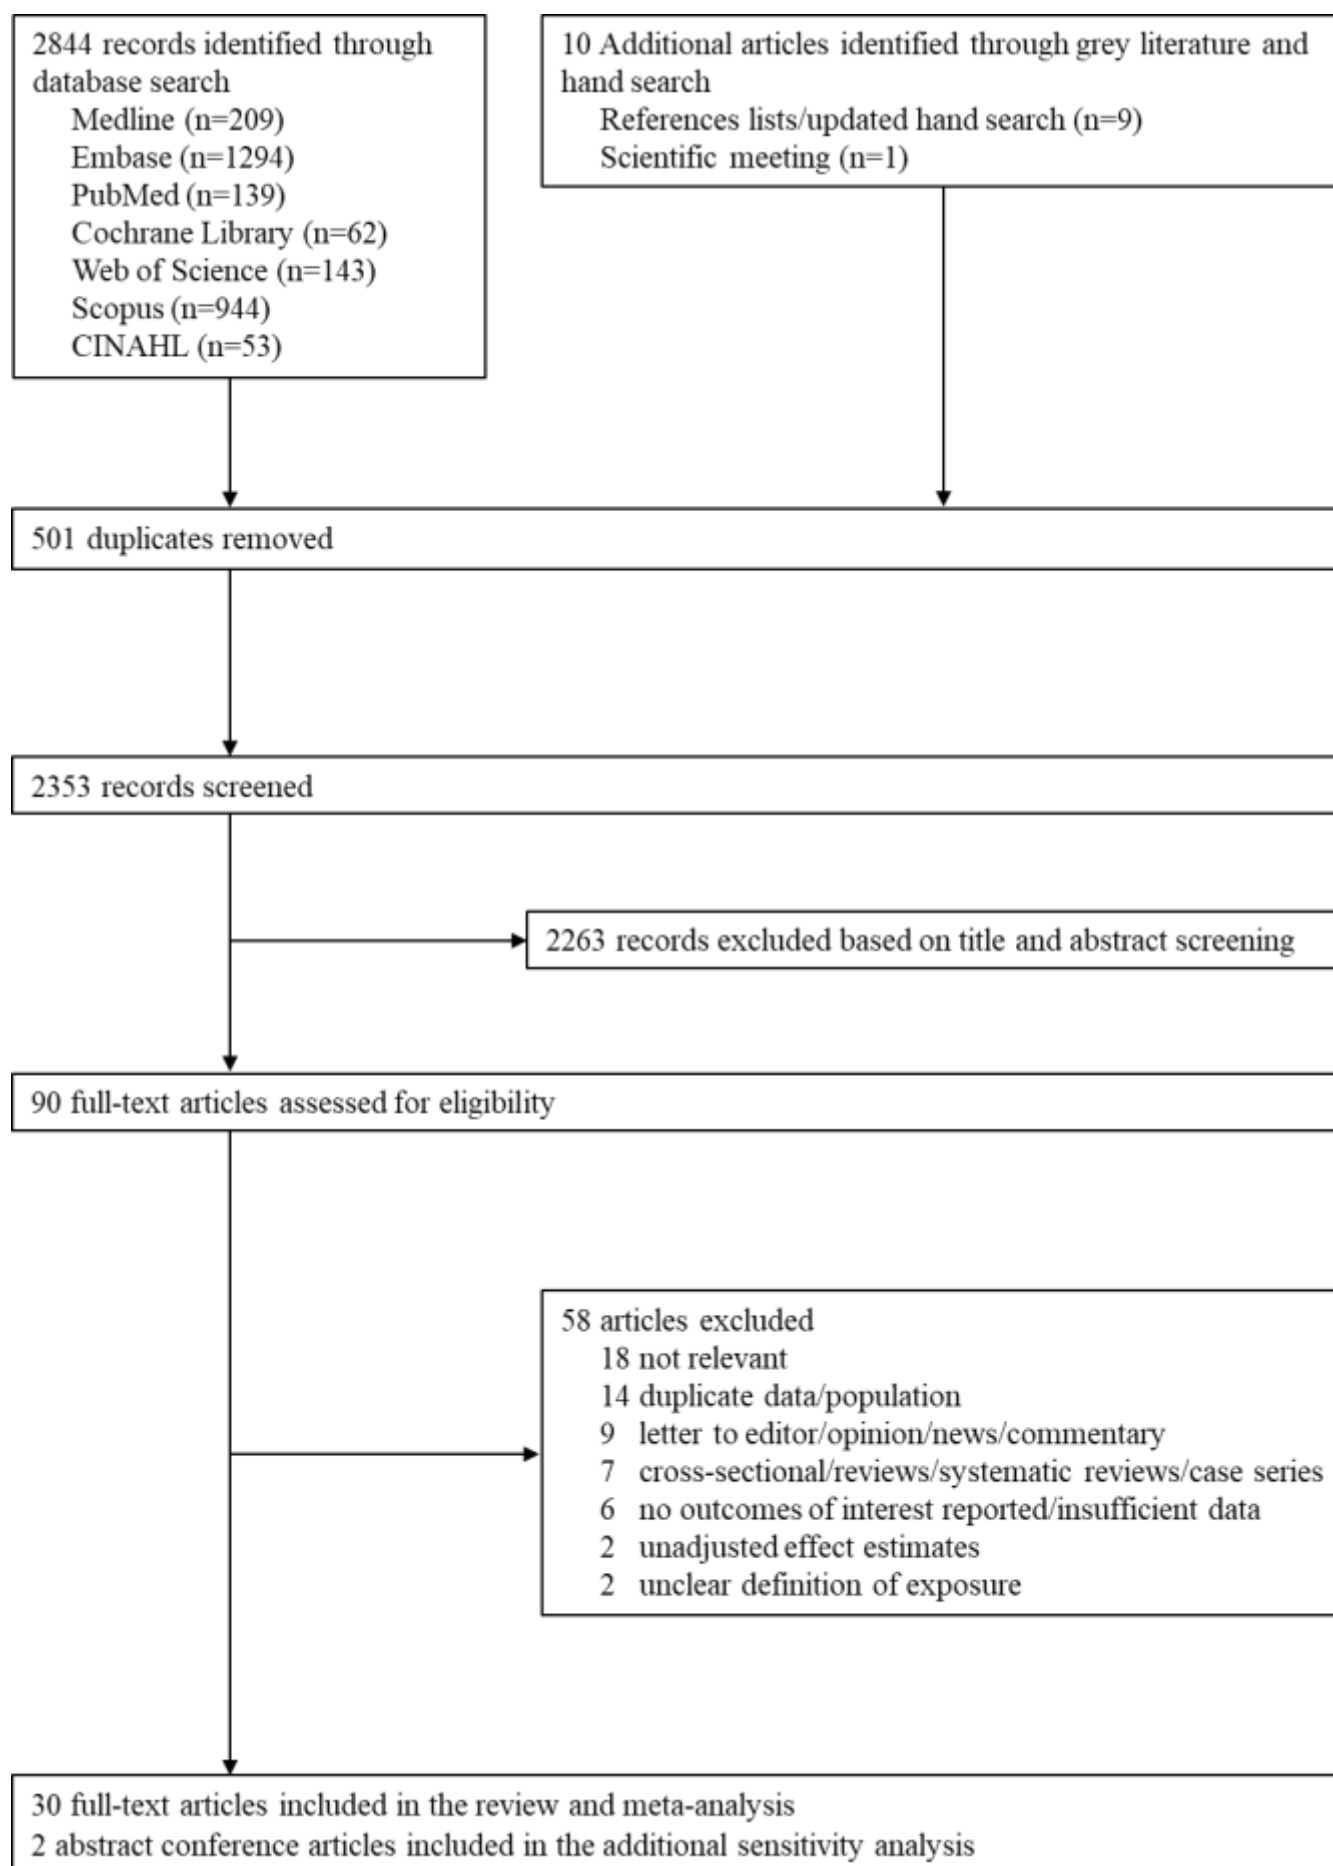

**Figure S2** Use of Thiazide Diuretics and the Risk of Lip Cancer

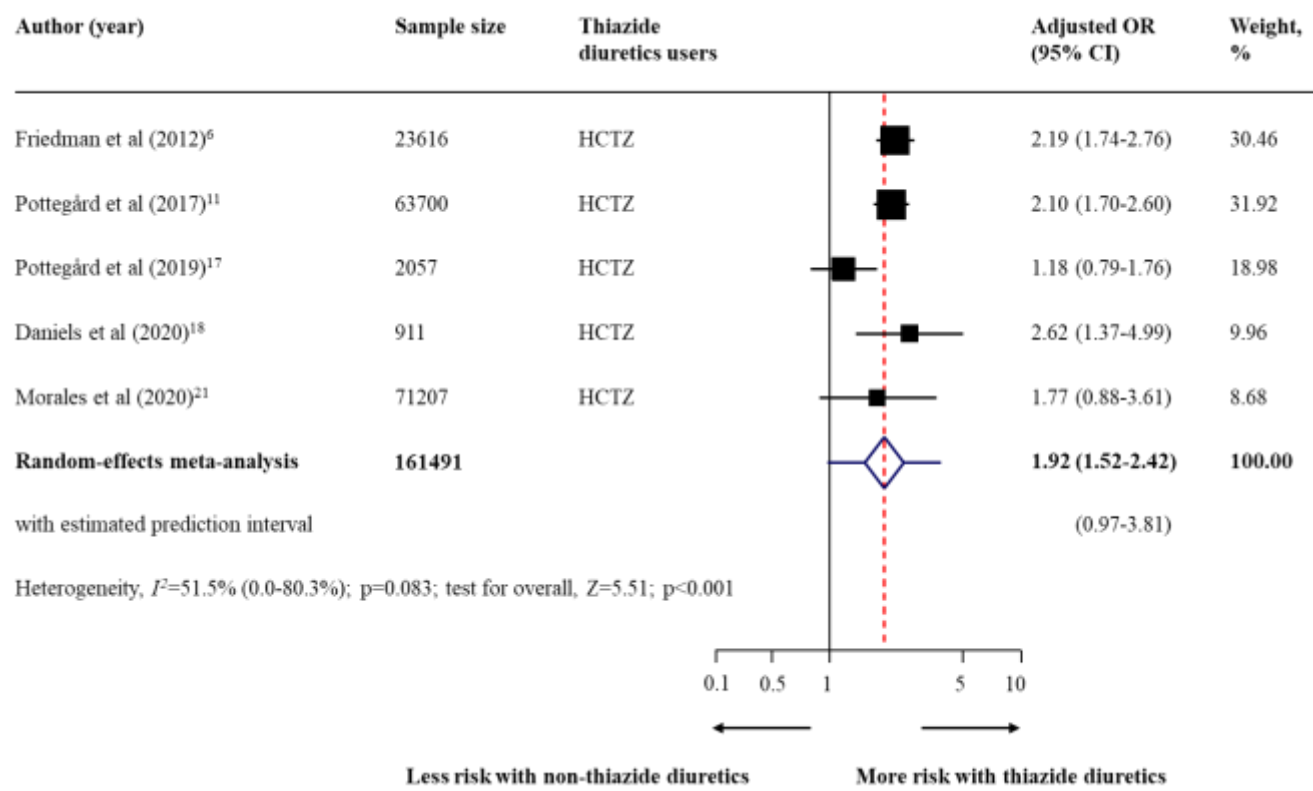

Abbreviations: CI, confidence interval, HCTZ, hydrochlorothiazide; OR, odds ratio.



**Figure S3** Funnel Plot of Included Studies in the Meta-Analysis

**A. Malignant Melanoma (All Subtype)**

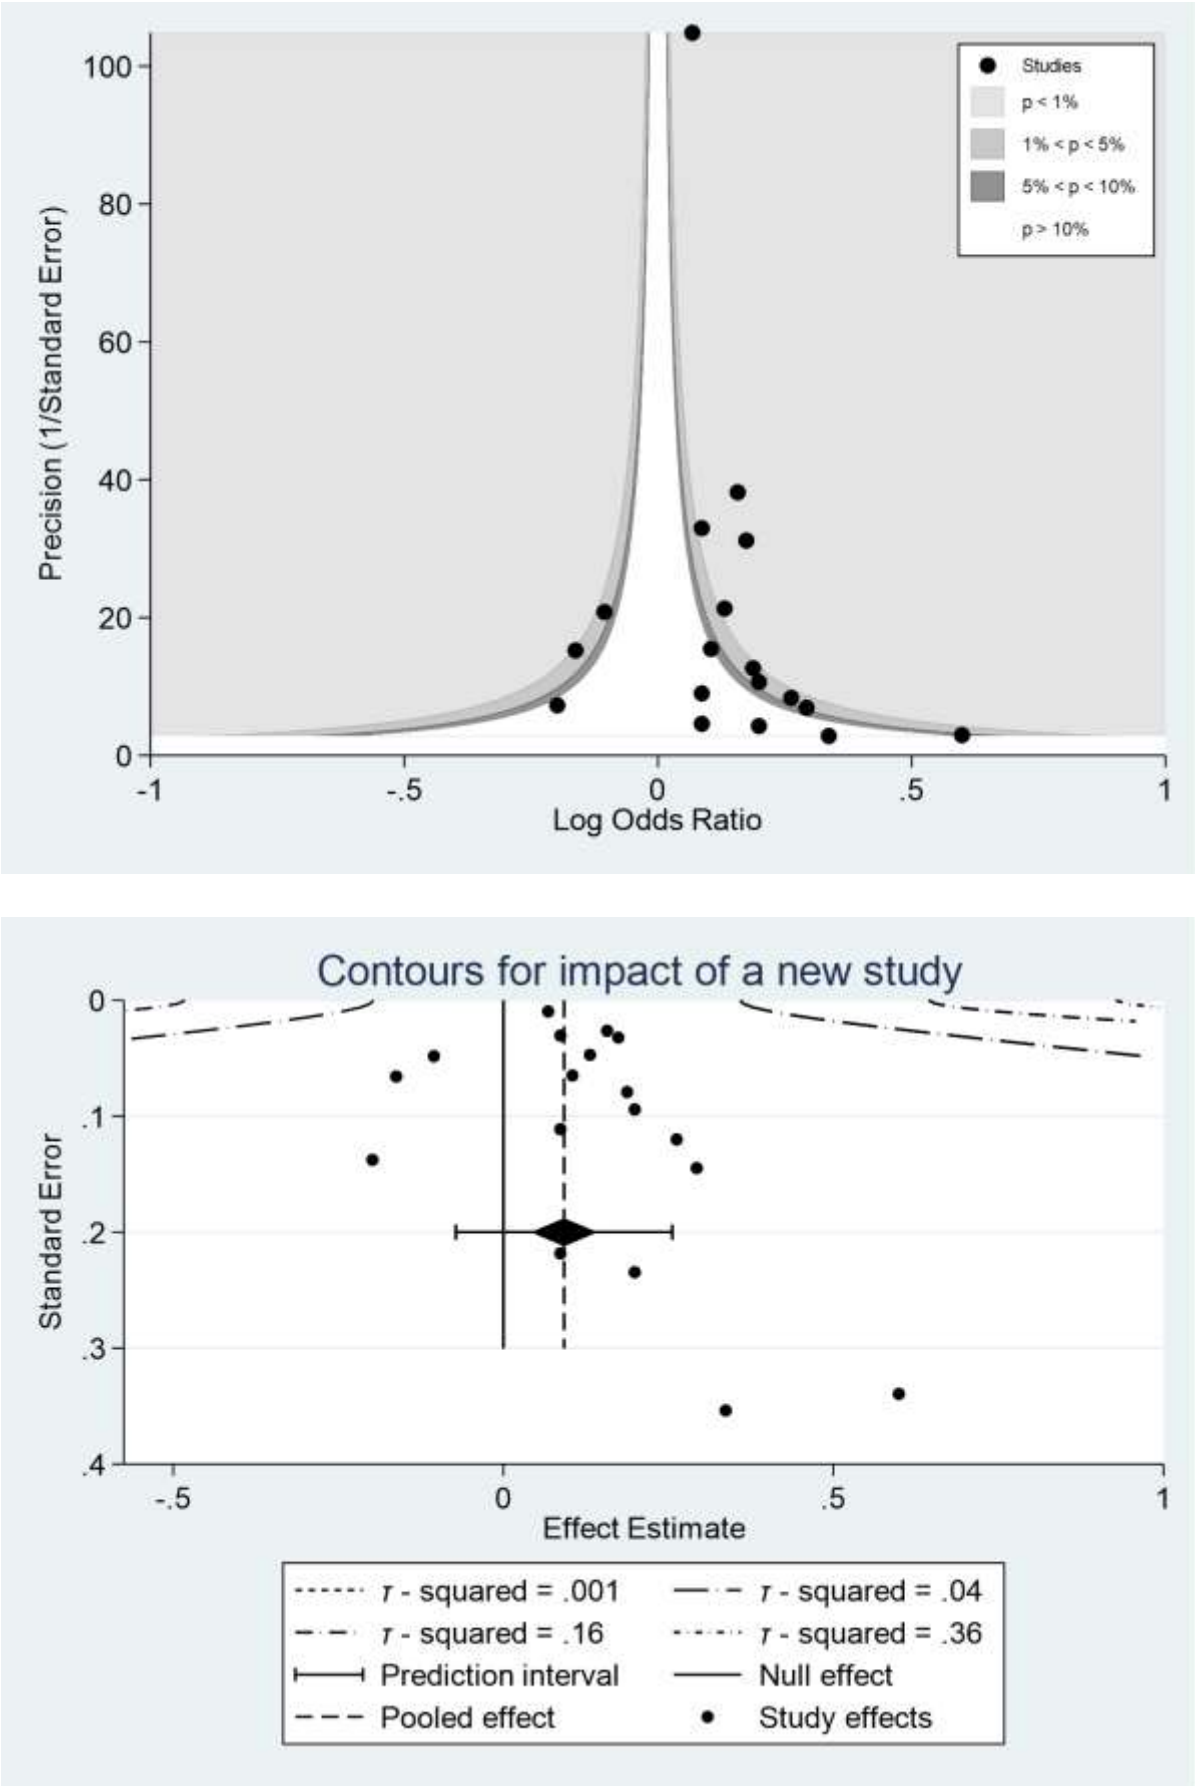

**Figure S3** Funnel Plot of Included Studies in the Meta-Analysis (Continued)

**B. Non-melanoma Skin Cancer: Basal Cell Carcinoma**

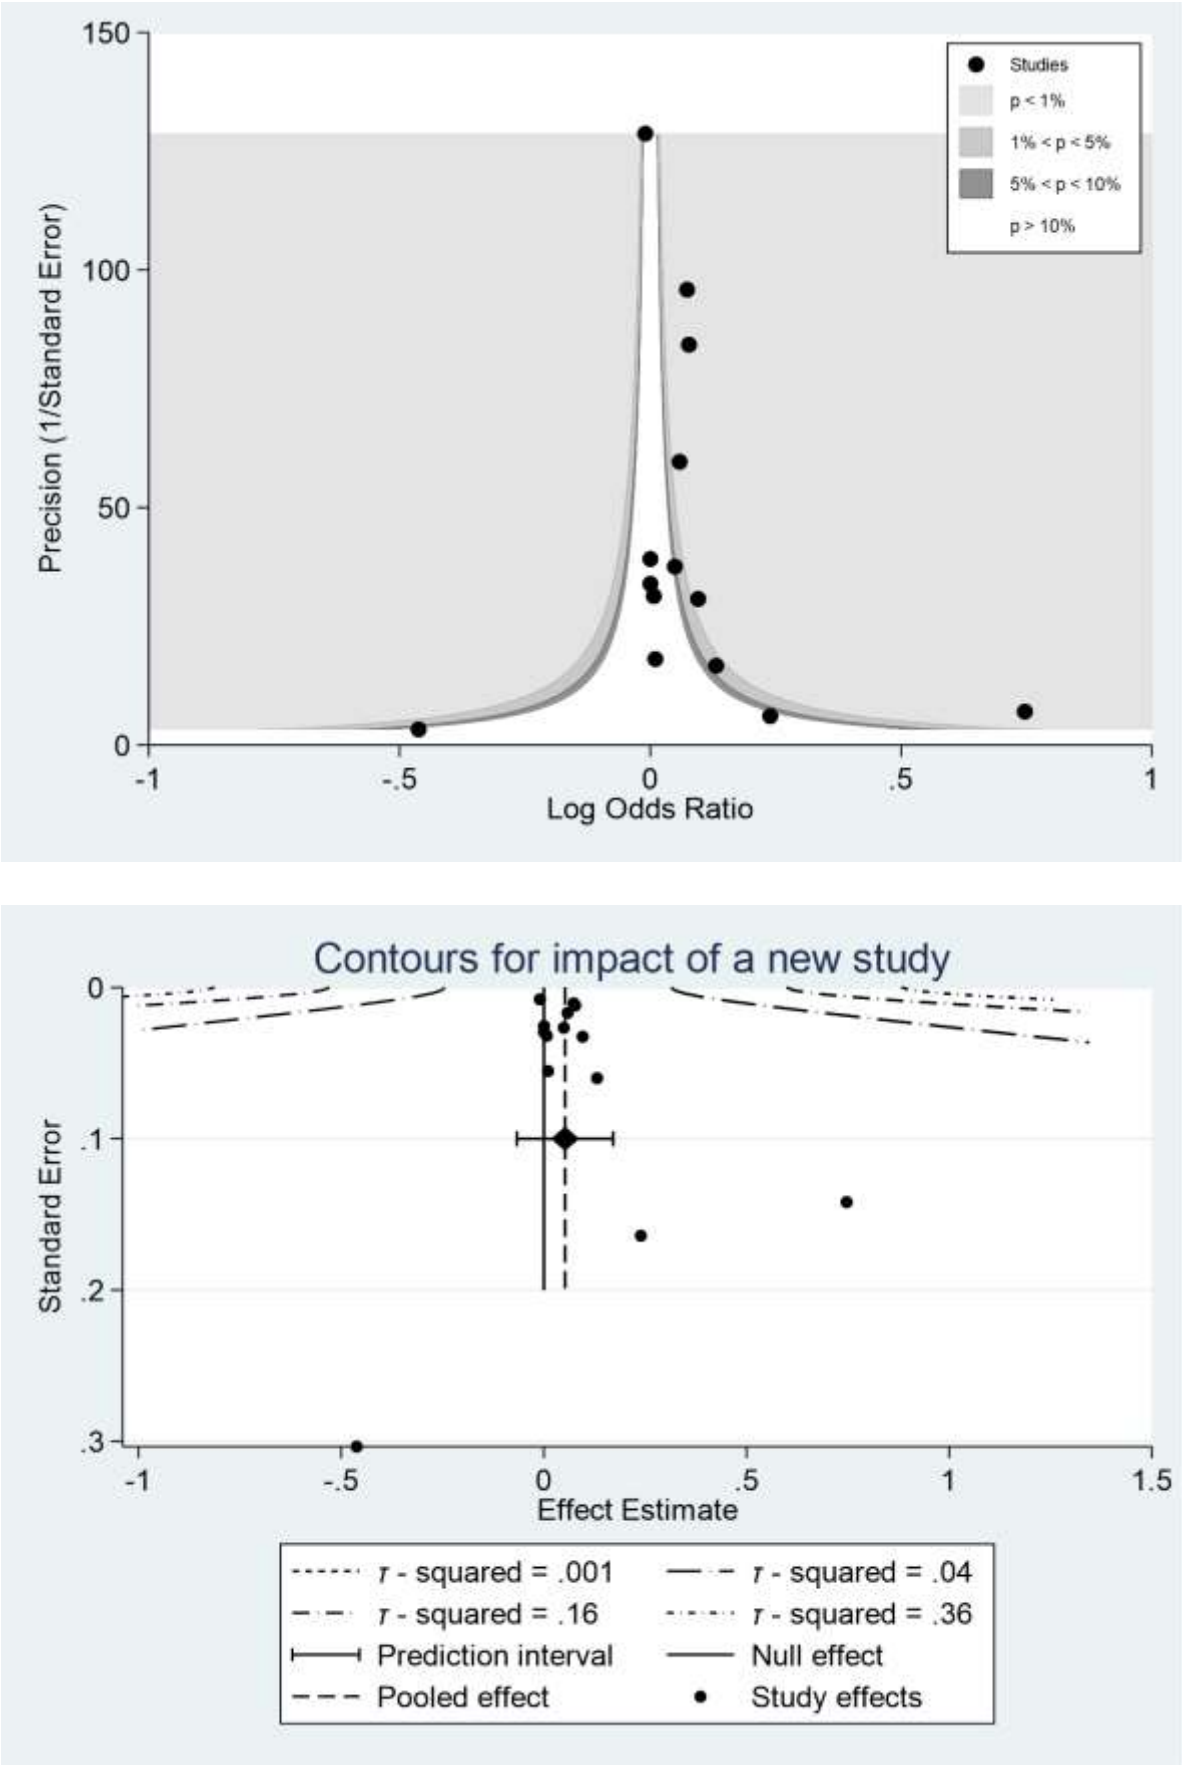

**Figure S3** Funnel Plot of Included Studies in the Meta-Analysis (Continued)

C. Non-melanoma Skin Cancer: Squamous Cell Carcinoma

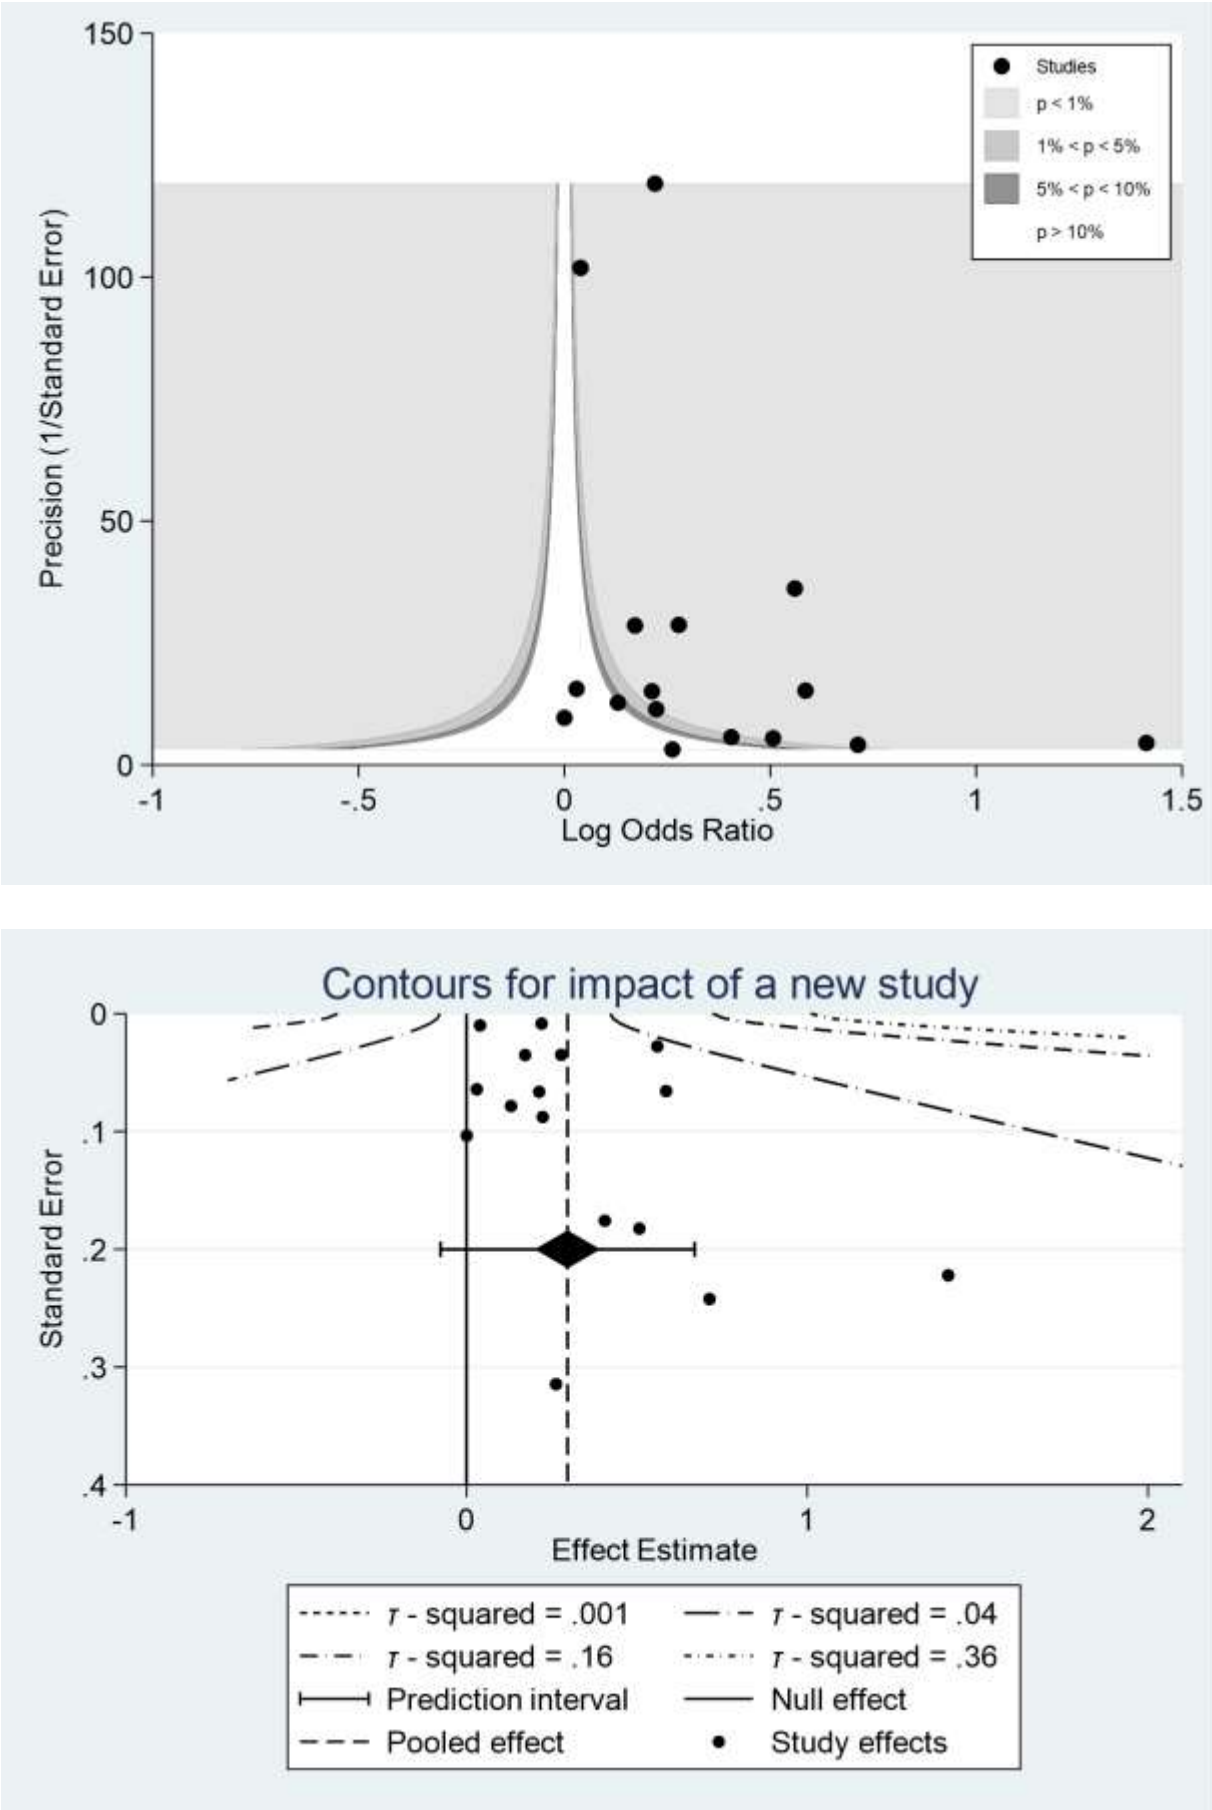

**Figure S3** Funnel Plot of Included Studies in the Meta-Analysis (Continued)

**D. Non-melanoma Skin Cancer: Unspecified**

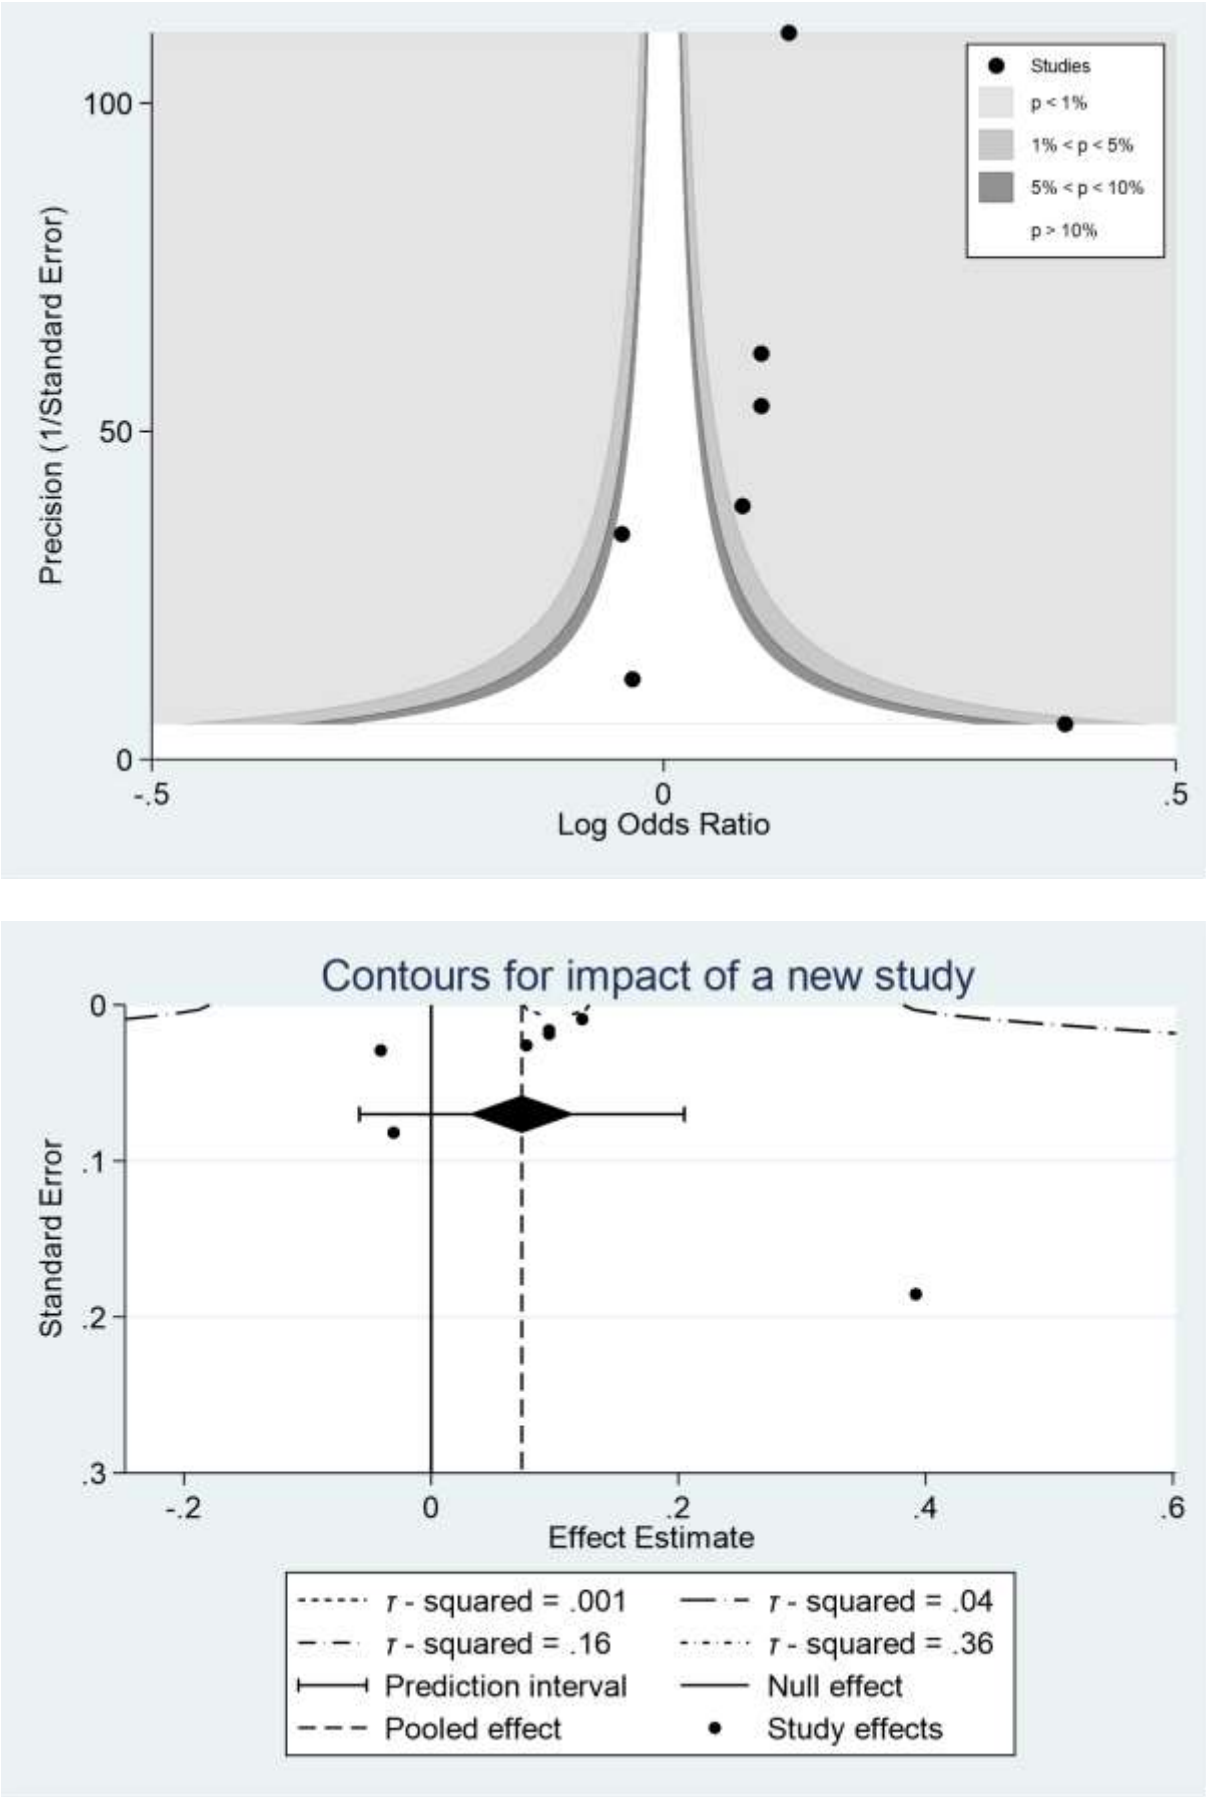

**Figure S3** Funnel Plot of Included Studies in the Meta-Analysis (Continued)

**E. Lip Cancer**

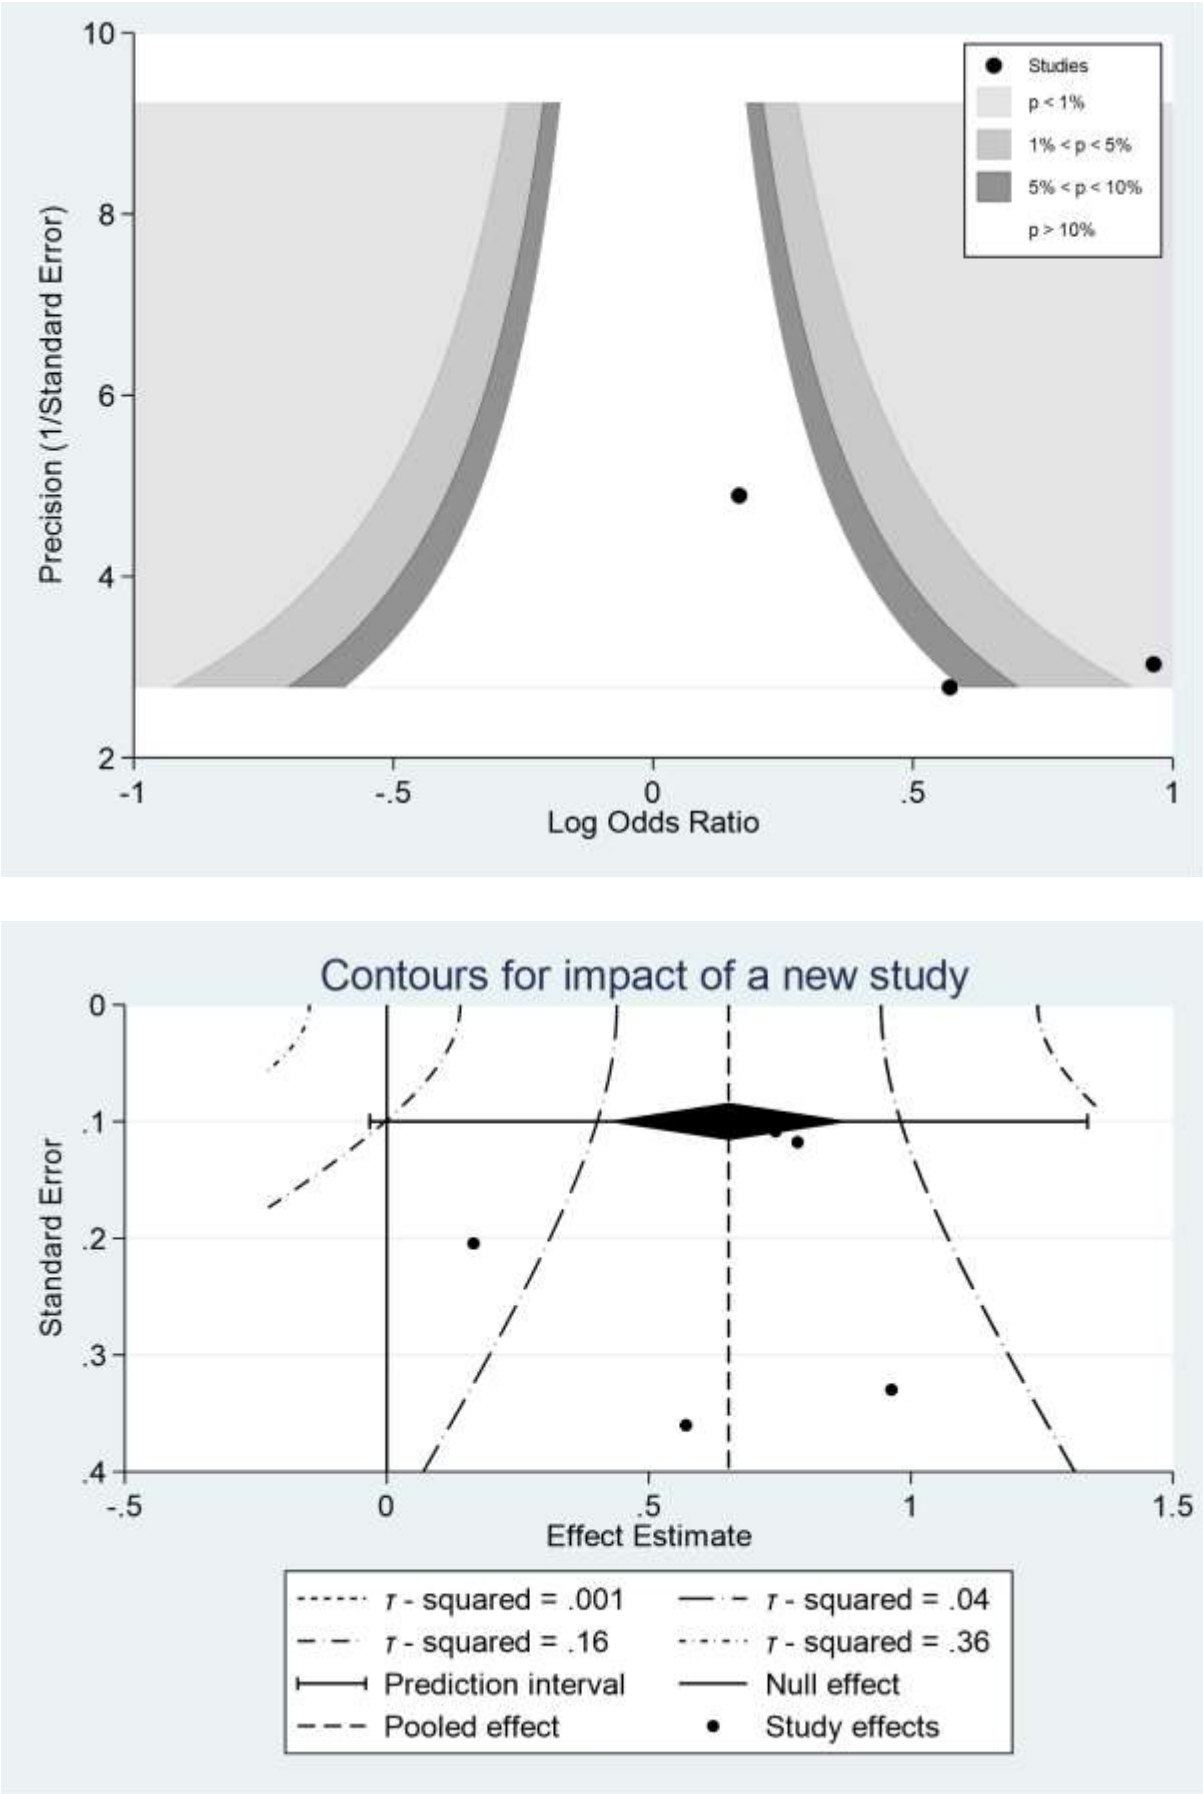

**File S1** Meta-Analysis of Observational Studies in Epidemiology (MOOSE) statement Checklist

| Item No                                            | Recommendation                                                                                                 | Reported on Page No    |
|----------------------------------------------------|----------------------------------------------------------------------------------------------------------------|------------------------|
| <b>Reporting of background should include</b>      |                                                                                                                |                        |
| 1                                                  | Problem definition                                                                                             | Page 3                 |
| 2                                                  | Hypothesis statement                                                                                           | Page 3                 |
| 3                                                  | Description of the study outcomes                                                                              | Page 3, Table S2       |
| 4                                                  | Types of exposure or intervention                                                                              | Page 3,4, Table S2     |
| 5                                                  | Type of study designs used                                                                                     | Page 3,4, Table S2     |
| 6                                                  | Study population                                                                                               | Page 3,4, Table S2     |
| <b>Reporting of search strategy should include</b> |                                                                                                                |                        |
| 7                                                  | Qualifications of searchers (eg. librarians and investigators)                                                 | Page 3                 |
| 8                                                  | Search strategy, including time period included in the synthesis and keywords                                  | Page 3, Table S1       |
| 9                                                  | Effort to include all available studies, including contact with authors                                        | Page 4                 |
| 10                                                 | Databases and registries searched                                                                              | Page 3, Table S1       |
| 11                                                 | Search software used, name and version, including special features used (eg. explosion)                        | Table S1               |
| 12                                                 | Use of hand searching (eg. reference list of obtained articles)                                                | Page 3                 |
| 13                                                 | List of citations located and those excluded, including justification                                          | Figure S1, eReferences |
| 14                                                 | Method of addressing articles published in languages other than English                                        | Page 3                 |
| 15                                                 | Method of handling abstracts and unpublished studies                                                           | Page 5                 |
| 16                                                 | Description of any contact with authors                                                                        | Page 4                 |
| <b>Reporting of methods should include</b>         |                                                                                                                |                        |
| 17                                                 | Description of relevance or appropriateness of studies assembled for assessing the hypothesis to be tested     | Page 4                 |
| 18                                                 | Rationale for the selection and coding of data (eg. sound clinical principles or convenience)                  | Page 4                 |
| 19                                                 | Documentation of how data were classified and coded (eg. multiple raters, blinding and interrater reliability) | Page 4                 |
| 20                                                 | Assessment of confounding (eg. comparability of cases and controls in studies where appropriate)               | Page 4                 |

Stroup DF, Berlin JA, Morton SC, et al. Meta-analysis of observational studies in epidemiology: a proposal for reporting. Meta-analysis Of Observational Studies in Epidemiology (MOOSE) group. JAMA. 2000;283(15):2008-12.

**File S1** Meta-Analysis of Observational Studies in Epidemiology (MOOSE) statement Checklist (Continued)

| Item No                                                | Recommendation                                                                                                                                                                                                                                                                | Reported on Page No       |
|--------------------------------------------------------|-------------------------------------------------------------------------------------------------------------------------------------------------------------------------------------------------------------------------------------------------------------------------------|---------------------------|
| <b>Reporting of methods should include (Continued)</b> |                                                                                                                                                                                                                                                                               |                           |
| 21                                                     | Assessment of study quality, including blinding of quality assessors; stratification or regression on possible predictors of study results                                                                                                                                    | Page 4                    |
| 22                                                     | Assessment of heterogeneity                                                                                                                                                                                                                                                   | Page 5                    |
| 23                                                     | Description of statistical methods (eg. complete description of fixed or random effects models, justification of whether the chosen models account for predictions of study results, dose-response models, or cumulative meta-analysis) in sufficient detail to be replicated | Page 4,5                  |
| 24                                                     | Provision of appropriate tables and graphics                                                                                                                                                                                                                                  | Throughout tables/figures |
| <b>Reporting of results should include</b>             |                                                                                                                                                                                                                                                                               |                           |
| 25                                                     | Graph summarizing individual study estimates and overall estimate                                                                                                                                                                                                             | Throughout figures        |
| 26                                                     | Table giving descriptive information for each study included                                                                                                                                                                                                                  | Throughout tables         |
| 27                                                     | Results of sensitivity testing (eg. subgroup analysis)                                                                                                                                                                                                                        | Page 11,12                |
| 28                                                     | Indication of statistical uncertainty of findings                                                                                                                                                                                                                             | Page 12, Table 2          |
| <b>Reporting of discussion should include</b>          |                                                                                                                                                                                                                                                                               |                           |
| 29                                                     | Quantitative assessment of bias (eg. publication bias)                                                                                                                                                                                                                        | Page 13                   |
| 30                                                     | Justification for exclusion (eg. exclusion of non-English language citations)                                                                                                                                                                                                 | Not applicable            |
| 31                                                     | Assessment of quality of included studies                                                                                                                                                                                                                                     | Page 13                   |
|                                                        | Reporting of conclusion should include                                                                                                                                                                                                                                        | Page 14                   |
| 32                                                     | Consideration of alternative explanations for observed results                                                                                                                                                                                                                | Page 12,13                |
| 33                                                     | Generalization of the conclusions (eg. appropriate for the data presented and within the domain of the literature review)                                                                                                                                                     | Page 14                   |
| 34                                                     | Guidelines for future research                                                                                                                                                                                                                                                | Page 14                   |
| 35                                                     | Disclosure of funding source                                                                                                                                                                                                                                                  | Page 14                   |

Stroup DF, Berlin JA, Morton SC, et al. Meta-analysis of observational studies in epidemiology: a proposal for reporting. Meta-analysis Of Observational Studies in Epidemiology (MOOSE) group. JAMA. 2000;283(15):2008-12.

## File S2 PRISMA 2020 Statement Checklist

| Section and Topic             | Item # | Checklist item                                                                                                                                                                                                                                                                                       | Location where item is reported |
|-------------------------------|--------|------------------------------------------------------------------------------------------------------------------------------------------------------------------------------------------------------------------------------------------------------------------------------------------------------|---------------------------------|
| <b>TITLE</b>                  |        |                                                                                                                                                                                                                                                                                                      |                                 |
| Title                         | 1      | Identify the report as a systematic review.                                                                                                                                                                                                                                                          | Page 1                          |
| <b>ABSTRACT</b>               |        |                                                                                                                                                                                                                                                                                                      |                                 |
| Abstract                      | 2      | See the PRISMA 2020 for Abstracts checklist.                                                                                                                                                                                                                                                         | Page 1, 2                       |
| <b>INTRODUCTION</b>           |        |                                                                                                                                                                                                                                                                                                      |                                 |
| Rationale                     | 3      | Describe the rationale for the review in the context of existing knowledge.                                                                                                                                                                                                                          | Page 3                          |
| Objectives                    | 4      | Provide an explicit statement of the objective(s) or question(s) the review addresses.                                                                                                                                                                                                               | Page 3                          |
| <b>METHODS</b>                |        |                                                                                                                                                                                                                                                                                                      |                                 |
| Eligibility criteria          | 5      | Specify the inclusion and exclusion criteria for the review and how studies were grouped for the syntheses.                                                                                                                                                                                          | Page 3,4, Table S2              |
| Information sources           | 6      | Specify all databases, registers, websites, organisations, reference lists and other sources searched or consulted to identify studies. Specify the date when each source was last searched or consulted.                                                                                            | Page 3, Table S1                |
| Search strategy               | 7      | Present the full search strategies for all databases, registers and websites, including any filters and limits used.                                                                                                                                                                                 | Table S1                        |
| Selection process             | 8      | Specify the methods used to decide whether a study met the inclusion criteria of the review, including how many reviewers screened each record and each report retrieved, whether they worked independently, and if applicable, details of automation tools used in the process.                     | Page 4                          |
| Data collection process       | 9      | Specify the methods used to collect data from reports, including how many reviewers collected data from each report, whether they worked independently, any processes for obtaining or confirming data from study investigators, and if applicable, details of automation tools used in the process. | Page 4                          |
| Data items                    | 10a    | List and define all outcomes for which data were sought. Specify whether all results that were compatible with each outcome domain in each study were sought (e.g. for all measures, time points, analyses), and if not, the methods used to decide which results to collect.                        | Page 4                          |
|                               | 10b    | List and define all other variables for which data were sought (e.g. participant and intervention characteristics, funding sources). Describe any assumptions made about any missing or unclear information.                                                                                         | Page 4                          |
| Study risk of bias assessment | 11     | Specify the methods used to assess risk of bias in the included studies, including details of the tool(s) used, how many reviewers assessed each study and whether they worked independently, and if applicable, details of automation tools used in the process.                                    | Page 4                          |
| Effect measures               | 12     | Specify for each outcome the effect measure(s) (e.g. risk ratio, mean difference) used in the synthesis or presentation of results.                                                                                                                                                                  | Page 4                          |
| Synthesis methods             | 13a    | Describe the processes used to decide which studies were eligible for each synthesis (e.g. tabulating the study intervention characteristics and comparing against the planned groups for each synthesis (item #5)).                                                                                 |                                 |
|                               | 13b    | Describe any methods required to prepare the data for presentation or synthesis, such as handling of missing summary statistics, or data conversions.                                                                                                                                                | Page 4,5                        |
|                               | 13c    | Describe any methods used to tabulate or visually display results of individual studies and syntheses.                                                                                                                                                                                               | Page 4,5                        |
|                               | 13d    | Describe any methods used to synthesize results and provide a rationale for the choice(s). If meta-analysis was performed, describe the model(s), method(s) to identify the presence and extent of statistical heterogeneity, and software package(s) used.                                          | Page 4,5                        |
|                               | 13e    | Describe any methods used to explore possible causes of heterogeneity among study results (e.g. subgroup analysis, meta-regression).                                                                                                                                                                 | Page 5                          |
|                               | 13f    | Describe any sensitivity analyses conducted to assess robustness of the synthesized results.                                                                                                                                                                                                         | Page 5                          |



| Section and Topic                              | Item # | Checklist item                                                                                                                                                                                                                                                                       | Location where item is reported |
|------------------------------------------------|--------|--------------------------------------------------------------------------------------------------------------------------------------------------------------------------------------------------------------------------------------------------------------------------------------|---------------------------------|
| Reporting bias assessment                      | 14     | Describe any methods used to assess risk of bias due to missing results in a synthesis (arising from reporting biases).                                                                                                                                                              | NA                              |
| Certainty assessment                           | 15     | Describe any methods used to assess certainty (or confidence) in the body of evidence for an outcome.                                                                                                                                                                                | Page 5                          |
| <b>RESULTS</b>                                 |        |                                                                                                                                                                                                                                                                                      |                                 |
| Study selection                                | 16a    | Describe the results of the search and selection process, from the number of records identified in the search to the number of studies included in the review, ideally using a flow diagram.                                                                                         | Page 6, Figure S1               |
|                                                | 16b    | Cite studies that might appear to meet the inclusion criteria, but which were excluded, and explain why they were excluded.                                                                                                                                                          | Page 6                          |
| Study characteristics                          | 17     | Cite each included study and present its characteristics.                                                                                                                                                                                                                            | Page 6, Table 1                 |
| Risk of bias in studies                        | 18     | Present assessments of risk of bias for each included study.                                                                                                                                                                                                                         | Page 6, Table S7                |
| Results of individual studies                  | 19     | For all outcomes, present, for each study: (a) summary statistics for each group (where appropriate) and (b) an effect estimate and its precision (e.g. confidence/credible interval), ideally using structured tables or plots.                                                     | Table 2, Figure 1-4             |
| Results of syntheses                           | 20a    | For each synthesis, briefly summarise the characteristics and risk of bias among contributing studies.                                                                                                                                                                               | Page 8,9                        |
|                                                | 20b    | Present results of all statistical syntheses conducted. If meta-analysis was done, present for each the summary estimate and its precision (e.g. confidence/credible interval) and measures of statistical heterogeneity. If comparing groups, describe the direction of the effect. | Page 8,9, Table 2               |
|                                                | 20c    | Present results of all investigations of possible causes of heterogeneity among study results.                                                                                                                                                                                       | Page 11,12                      |
|                                                | 20d    | Present results of all sensitivity analyses conducted to assess the robustness of the synthesized results.                                                                                                                                                                           | Page 11,12                      |
| Reporting biases                               | 21     | Present assessments of risk of bias due to missing results (arising from reporting biases) for each synthesis assessed.                                                                                                                                                              | NA                              |
| Certainty of evidence                          | 22     | Present assessments of certainty (or confidence) in the body of evidence for each outcome assessed.                                                                                                                                                                                  | Table 2                         |
| <b>DISCUSSION</b>                              |        |                                                                                                                                                                                                                                                                                      |                                 |
| Discussion                                     | 23a    | Provide a general interpretation of the results in the context of other evidence.                                                                                                                                                                                                    | Page 12                         |
|                                                | 23b    | Discuss any limitations of the evidence included in the review.                                                                                                                                                                                                                      | Page 12,13                      |
|                                                | 23c    | Discuss any limitations of the review processes used.                                                                                                                                                                                                                                | Page 13                         |
|                                                | 23d    | Discuss implications of the results for practice, policy, and future research.                                                                                                                                                                                                       | Page 15                         |
| <b>OTHER INFORMATION</b>                       |        |                                                                                                                                                                                                                                                                                      |                                 |
| Registration and protocol                      | 24a    | Provide registration information for the review, including register name and registration number, or state that the review was not registered.                                                                                                                                       | Page 3                          |
|                                                | 24b    | Indicate where the review protocol can be accessed, or state that a protocol was not prepared.                                                                                                                                                                                       | Page 3                          |
|                                                | 24c    | Describe and explain any amendments to information provided at registration or in the protocol.                                                                                                                                                                                      | Page 3, Appendix III            |
| Support                                        | 25     | Describe sources of financial or non-financial support for the review, and the role of the funders or sponsors in the review.                                                                                                                                                        | Page 14                         |
| Competing interests                            | 26     | Declare any competing interests of review authors.                                                                                                                                                                                                                                   | Page 15                         |
| Availability of data, code and other materials | 27     | Report which of the following are publicly available and where they can be found: template data collection forms; data extracted from included studies; data used for all analyses; analytic code; any other materials used in the review.                                           | NA                              |

**PROSPERO International prospective register of systematic reviews**

**The Association Between Thiazide Diuretics Use and the Risk of Skin Cancer: A Systematic Review and Meta-Analysis**

**Funding sources/sponsors**

Chiang Mai University.

**Conflicts of interest**

No conflict of interest to disclose.

**Review question(s)**

To systematically review and synthesize the association between the use of thiazide diuretics and the risk of skin cancer.

**Searches**

An experienced information specialist will conduct electronic search strategies using an iterative process and in collaboration with the search team. Electronic databases, including PubMed, Medline, Embase, Web of Science, Scopus, CINAHL, and CENTRAL—Cochrane library will be used to identify all relevant abstracts. The search strategy will be included the pharmacological class of thiazide or thiazide-like diuretics (Bendroflumethiazide, Benzthiazide, Chlorthalidone, Chlorothiazide, Cyclothiazide, Hydrochlorothiazide, Hydroflumethiazide, Indapamide, Metolazone, Methyclothiazide, Quinethazone) AND “skin cancer” or “squamous cell carcinoma” or “melanoma” or non-melanoma” or “basal cell carcinoma” or malignant melanoma”, without language restriction. Key health and dermatology journals will be also manually searched.

Reference lists of included studies, previous systematic reviews, grey literature from Google Scholar, and preprint data (medRxiv and bioRxiv) will be supplemented to the bibliographic database searches. Furthermore, pre-planned updated searches will be performed.

**Condition or domain being studied**

Skin cancer among patients received thiazide diuretics for any indication.

**Participants/ population**

Adult and adolescent patients aged 12-18 or more regardless of comorbid conditions will be included without geographical restriction.

**Intervention(s), exposure(s)**

Thiazide treatment in any indication and duration.

**Comparator(s)/ control**

Non-thiazide users or intensive exposure versus fewer lifetime exposures to thiazide diuretics.

**Types of study to be included**

Published randomized controlled trials (RCTs), quasi-RCT, and comparative effectiveness observational non-randomized studies (cohort studies and case-control studies) in any setting and

context. Crossover, cross-sectional, N of one trial, case series/case reports, animal studies, and in vitro studies will be excluded.

### **Main outcome(s)**

Association of the use of thiazide diuretics and specific skin cancer types, including malignant melanoma (specific subtypes, superficial spreading melanoma, nodular melanoma, lentigo maligna melanoma) and non-melanoma skin cancer (basal cell carcinoma, squamous cell carcinoma, and unspecified non-melanoma).

Measures of effect

Risk of specific cancer types, hazard ratios (HRs), risk ratios (RRs), or odds ratios (ORs): all-time points as defined by the specific studies.

### **Additional outcome(s)**

- (i) Risk of new premalignant/precursor lesions (actinic keratosis or Bowen's disease)
- (ii) ~~Skin cancer related mortality~~ Other forms of skin cancer (lip cancer, Merkel cell carcinoma, malignant adnexal skin tumor, and oral cavity cancer).

Measures of effect

Risk of specific cancer types, hazard ratios (HRs), risk ratios (RRs), or odds ratios (ORs): all-time points as defined by the specific studies.

### **Data extraction, (selection and coding)**

Two independent investigators will review titles and abstracts of bibliographic database search results as well as records from the trial registers to identify studies. Citations determined potentially eligible by either investigator will undergo full-text screening. A third party will verify the accuracy.

Data will be collected based on qualitative and quantitative information as the following:

- (i) Patient characteristics (e.g., age, gender, ethnicity, and comorbidity)
- (ii) Study characteristics (e.g., number of participants, study method, study location, sample size, setting, outcome measures, risk of bias, and industry sponsorship)
- (iii) Thiazide diuretics exposure (e.g., treatment regimen, concomitant treatments, and duration of treatment)
- (iv) Outcomes of interest (methods/definitions for assessment outcomes, specific skin cancer types, and pre-specified outcomes)

If studies had overlapping study populations, the study with the most detailed and relevant information will be used. For studies with missing data or uncertain information, the corresponding author will be contacted. If the authors do not respond, the study will be excluded. The final set of data will be cross-checked by the two investigators. Any discrepancies will be addressed through a discussion.

### **Risk of bias (quality) assessment**

This systematic review and meta-analysis will be performed in line with the Preferred Reporting Items for Systematic Reviews and Meta-Analyses guidelines (PRISMA) and reported in line with the Meta-analysis Of Observational Studies in Epidemiology (MOOSE) statement.

Two independent investigators will be appraised the risk of bias and methodological quality for each included study based on its study design. The instrument to assess the risk of bias for RCTs and non-

randomized studies using the Version 2 of the Cochrane risk-of-bias tool for randomized trials (RoB 2) by The Cochrane Collaboration and the Newcastle-Ottawa Scale, respectively.

### **Strategy for data synthesis**

Only studies published in full-text will be included in the data analysis to limit incomplete information, however, the unpublished studies or abstract from conference meetings will be included in the post hoc meta-analysis.

If applicable, the ~~relative risk (RRs)~~ odds ratios (ORs) with the greatest degree of adjustment for potential confounding factors will be analyzed as the common effect estimates of association across studies. The pooled ~~RRs~~ ORs along with the 95% confidence intervals (CIs) will be calculated using DerSimonian-Laird random-effects models.

Heterogeneity will be assessed using the chi-squared statistic,  $I^2$  index, and tau-square statistic to estimate the degree of inconsistency. From the clinical point of view, heterogeneity of the studies will be done by qualitatively assessing the PICOTS (populations, interventions, comparators, outcomes, timing, and setting) of the included studies, looking for similarities and differences. The funnel plot and tested for funnel asymmetry using Begg's and Egger's regression test will be used to investigate any evidence of publication bias. The trim and fill method will be tested to calibrate for publication bias.

To explore the potential source of heterogeneity, the level risk of bias and key characteristics of included studies will be included in a random-effects meta-regression. Moreover, if possible, dose- and duration-responses effects will be also performed.

### **Analysis of subgroups or subsets**

Preplanned stratification or categories for subgroup analyses include (i) patient characteristics (e.g., age, gender, race/ethnicity, individual thiazide diuretics use, skin phototype, and history of skin cancer or precancerous lesions) and (ii) study characteristics (e.g., randomized vs. non-randomized, sample size, duration of follow-up, study quality, and geographical location).

## **File S4 The Newcastle-Ottawa Scale (NOS) for Assessing the Quality of Non-Randomized Studies**

### **NOS Assessment Scale: Case-Control Studies**

Note: A study can be awarded a maximum of one star for each numbered item within the Selection and Exposure categories. A maximum of two stars can be given for Comparability.

#### **Selection**

- 1) Is the case definition adequate?
  - a) yes, with independent validation (histological confirmation or through regional/national cancer registries) \*
  - b) yes, e.g., record linkage or based on self-reports
  - c) no description
- 2) Representativeness of the cases
  - a) consecutive or obviously representative series of cases \*
  - b) potential for selection biases or not stated
- 3) Selection of Controls
  - a) community controls (population-based studies or nested case-control) \*
  - b) hospital controls
  - c) no description
- 4) Definition of Controls
  - a) no history of disease (endpoint) \*
  - b) no description of source

#### **Comparability**

- 1) Comparability of cases and controls on the basis of the design or analysis
  - a) study controls for “age and Fitzpatrick skin type/sun exposure” \*
  - b) study controls for any additional factor: at least 3 additional factors, including sex, race/ethnic, skin tanning, smoking, alcohol consumption, precancerous skin conditions, comorbidities, photosensitizing drugs, medications with potential antineoplastic properties (e.g., aspirin, NSAIDs, statins), other antihypertensive agents, human papillomavirus; immunosuppressive drugs, environmental hazards/occupational risks (e.g., exposure of arsenic, polycyclic aromatic hydrocarbons, nitrosamine, alkylating agents), and genetic predisposing factors (e.g., xeroderma pigmentosum) \*

#### **Exposure**

- 1) Ascertainment of exposure
  - a) secure record (e.g., prescription claim) \*
  - b) structured interview where blind to case/control status \*
  - c) interview not blinded to case/control status
  - d) written self-report or medical record only
  - e) no description
- 2) Same method of ascertainment for cases and controls
  - a) yes \*
  - b) no
- 3) Non-Response rate
  - a) same rate for both groups \*
  - b) non respondents described
  - c) rate different and no designation

## **File S4 The Newcastle-Ottawa Scale (NOS) for Assessing the Quality of Non-Randomized Studies (Continued)**

### **NOS Assessment Scale: Cohort Studies**

Note: A study can be awarded a maximum of one star for each numbered item within the Selection and Outcome categories. A maximum of two stars can be given for Comparability

#### **Selection**

- 1) Representativeness of the exposed cohort
  - a) truly representative: population-based cohort or regional/national registries data \*
  - b) somewhat representative: hospital-based cohort \*
  - c) selected group of users e.g., volunteers
  - d) no description of the derivation of the cohort
- 2) Selection of the non-exposed cohort
  - a) drawn from the same community as the exposed cohort \*
  - b) drawn from a different source
  - c) no description of the derivation of the non-exposed cohort
- 3) Ascertainment of exposure
  - a) secure record (e.g., prescription claim) \*
  - b) structured interview \*
  - c) written self-report
  - d) no description
- 4) Demonstration that outcome of interest was not present at start of study
  - a) yes \*
  - b) no

#### **Comparability**

- 1) Comparability of cohorts on the basis of the design or analysis
  - a) study controls for “age and Fitzpatrick skin type/sun exposure” \*
  - b) study controls for any additional factor: at least 3 additional factors, including sex, race/ethnic, skin tanning, smoking, alcohol consumption, precancerous skin conditions, comorbidities, photosensitizing drugs, medications with potential antineoplastic properties (e.g., aspirin, NSAIDs, statins), other antihypertensive agents, human papillomavirus; immunosuppressive drugs, environmental hazards/occupational risks (e.g., exposure of arsenic, polycyclic aromatic hydrocarbons, nitrosamine, alkylating agents), and genetic predisposing factors (e.g., xeroderma pigmentosum) \*

#### **Outcome**

- 1) Assessment of outcome
  - a) independent blind assessment \*
  - b) record linkage (e.g., histological confirmation or through regional/national cancer registries, ICD9/10, or validated read codes) \*
  - c) self-report
  - d) no description
- 2) Was follow-up long enough for outcomes to occur
  - a) yes (select an adequate follow up period for outcome of interest: median follow-up time >1 years or study period >5 years) \*
  - b) no
- 3) Adequacy of follow up of cohorts
  - a) complete follow up - all subjects accounted for \*
  - b) subjects lost to follow up unlikely to introduce bias (missing outcome <20%, select an adequate 80%) follow up, or description provided of those lost \*
  - c) follow up rate <80% (missing outcome >20%) and no description of those lost
  - d) no statement

## File S5 Modified Criteria of Evidence Certainty Assessment

| Domain                                                    | Score and application                                                                                                                                                                                                                                                                     |
|-----------------------------------------------------------|-------------------------------------------------------------------------------------------------------------------------------------------------------------------------------------------------------------------------------------------------------------------------------------------|
| Study limitations                                         | <ul style="list-style-type: none"> <li>Score as one of three levels, separately by type of study design: <ul style="list-style-type: none"> <li>Low level of study limitations</li> <li>Medium level of study limitations</li> <li>High level of study limitations</li> </ul> </li> </ul> |
| Directness                                                | <ul style="list-style-type: none"> <li>Score as one of two levels: <ul style="list-style-type: none"> <li>Direct</li> <li>Indirect</li> </ul> </li> </ul>                                                                                                                                 |
| Consistency                                               | <ul style="list-style-type: none"> <li>Score as one of three levels: <ul style="list-style-type: none"> <li>Consistent</li> <li>Inconsistent</li> <li>Unknown (e.g., single study)</li> </ul> </li> </ul>                                                                                 |
| Precision                                                 | <ul style="list-style-type: none"> <li>Score as one of two levels: <ul style="list-style-type: none"> <li>Precise</li> <li>Imprecise</li> </ul> </li> </ul>                                                                                                                               |
| Reporting bias                                            | <ul style="list-style-type: none"> <li>Score as one of two levels: <ul style="list-style-type: none"> <li>Suspected</li> <li>Undetected</li> </ul> </li> </ul>                                                                                                                            |
| Dose-response association                                 | <ul style="list-style-type: none"> <li>Score as one of two levels: <ul style="list-style-type: none"> <li>Present</li> <li>Undetected</li> </ul> </li> </ul>                                                                                                                              |
| Plausible confounding that would decrease observed effect | <ul style="list-style-type: none"> <li>Score as one of two levels: <ul style="list-style-type: none"> <li>Present</li> <li>Absent</li> </ul> </li> </ul>                                                                                                                                  |
| Strength of association (magnitude of effect)             | <ul style="list-style-type: none"> <li>Score as one of two levels: <ul style="list-style-type: none"> <li>Strong</li> <li>Weak</li> </ul> </li> </ul>                                                                                                                                     |

### Quality of the evidence

**High quality:** further research is very unlikely to change our confidence in the estimate of effect

**Moderate quality:** further research is likely to have an important impact on our confidence in the estimate of effect and may change the estimate

**Low quality:** further research is very likely to have an important impact on our confidence in the estimate of effect and is likely to change the estimate

**Very low quality:** we are very uncertain about the estimate.

**Insufficient:** we have no evidence, we are unable to estimate an effect, or we have no confidence in the estimate of effect for this outcome

### Established an overall SOE grade:

- Levels of grades are intended to communicate reviewer's conclusions of the strength of the overall assessment of a body evidence for a single outcome of a single treatment comparison.
- Each grade has two components. The first, principle definition concerns the level of confidence that reviewers place in the estimates for the benefit or harm; this equates to their judgment as to how closely the evidence is likely to reflect a true effect. The second, subsidiary definition involves an assessment of the level of deficiencies in the body of evidence and belief in the stability of the findings.
- The grade is based on domain scores as well as more holistic, summary appreciation of the possibly complex interaction among the individual domains.
- Evidence based on observational studies is assumed to pose a greater risk of having study limitation; this usually corresponding to an initial provisional grade of low SOE.
- Reviewers may also decide that after assessing the additional domains, the overall SOE of a body of observational studies can be upgraded to moderate (although rarely high).

Abbreviations: SOE, strength of evidence.

# File S6 List of Excluded Articles

|    | Article                                                                                                                                                                                                                                                                                 | Reason for Exclusion                                                                 |
|----|-----------------------------------------------------------------------------------------------------------------------------------------------------------------------------------------------------------------------------------------------------------------------------------------|--------------------------------------------------------------------------------------|
| 1  | Sjöberg T, et al. Angiotensin-Converting Enzyme Inhibitors and Risk of Esophageal and Gastric Cancer: A Nested Case-Control Study. Clin Gastroenterol Hepatol. 2007;5(10):1160-1166.e1161.                                                                                              | No outcomes of interest reported                                                     |
| 2  | Veronesi M, et al. A prospective evaluation of persistence on antihypertensive treatment with different antihypertensive drugs in clinical practice. Vasc Health Risk Manag . 2007;3(6):999-1005.                                                                                       | Not relevant in the context of the use of thiazide diuretics and risk of skin cancer |
| 3  | Christian JB, et al. Association of ACE inhibitors and angiotensin receptor blockers with keratinocyte cancer prevention in the randomized VATTC trial. J Natl Cancer Inst. 2008;100(17):1223-1232.                                                                                     | Unclear definition of thiazide diuretics exposure                                    |
| 4  | Jensen AO, et al. Use of photosensitizing diuretics and risk of skin cancer: A population based case control study. Pharmacoepidemiol Drug Saf. 2008;17:S109-S109.                                                                                                                      | Duplicate data                                                                       |
| 5  | Coogan PF, et al. Diuretic use and the risk of breast cancer. J Hum Hypertens. 2009;23(3):216-218.                                                                                                                                                                                      | No outcomes of interest reported                                                     |
| 6  | Friedman GD, et al. Screening pharmaceuticals for possible carcinogenic effects: initial positive results for drugs not previously screened. Cancer Causes Control. 2009;20(10):1821-1835.                                                                                              | Duplicate data                                                                       |
| 7  | Ruiter R, et al. High-Ceiling Diuretics Are Associated with an Increased Risk of Basal Cell Carcinoma in a Population-Based Follow-Up Study. Pharmacoepidemiol Drug Saf. 2010;19:S147-S148.                                                                                             | Duplicate data                                                                       |
| 8  | Hirose H, et al. Effects of losartan/hydrochlorothiazide treatment, after change from ARB at usual dosage, on blood pressure and various metabolic parameters including high-molecular weight adiponectin in Japanese male hypertensive subjects. Clin Exp Hypertens. 2011;33(1):41-46. | Not relevant in the context of the use of thiazide diuretics and risk of skin cancer |
| 9  | Oliva S, et al. Administration of angiotensin-converting enzyme inhibitors and $\beta$ -blockers during adjuvant trastuzumab chemotherapy for nonmetastatic breast cancer: Marker of risk or cardioprotection in the real world? Oncologist. 2012;17(7):917-924.                        | Not relevant in the context of the use of thiazide diuretics and risk of skin cancer |
| 10 | De Giorgi V, et al. Effect of beta-blockers and other antihypertensive drugs on the risk of melanoma recurrence and death. Mayo Clin Proc. 2013;88(11):1196-1203.                                                                                                                       | Not relevant in the context of the use of thiazide diuretics and risk of skin cancer |
| 11 | Jahan-Tigh RR, et al. Hydrochlorothiazide and cutaneous T cell lymphoma: Prospective analysis and case series. Cancer. 2013;119(4):825-831.                                                                                                                                             | Case series                                                                          |
| 12 | Gómez-Bernal S, et al. Photosensitivity due to thiazides. Actas Dermosifiliogr. 2014;105(4):359-366.                                                                                                                                                                                    | Review article                                                                       |
| 13 | Johannesdottir SA, et al. Use of antihypertensive drugs and risk of skin cancer. Pharmacoepidemiol Drug Saf. 2014;1):375.                                                                                                                                                               | Duplicate data                                                                       |
| 14 | McDonald E, et al. Prescription diuretic use and risk of basal cell carcinoma in the nationwide U.S. radiologic technologists cohort. Cancer Epidemiol Biomarkers Prev. 2014;23(8):1539-1545.                                                                                           | Unclear definition of thiazide diuretics exposure                                    |
| 15 | Arnsparang S, et al. Statin use and risk of nonmelanoma skin cancer: A nationwide study in Denmark. Br J Cancer. 2015;112(1):153-156.                                                                                                                                                   | Not relevant in the context of the use of thiazide diuretics and risk of skin cancer |



## Appendix VI List of Excluded Articles (Continued)

|    | Article                                                                                                                                                                                                                                                                      | Reason for Exclusion                                                                 |
|----|------------------------------------------------------------------------------------------------------------------------------------------------------------------------------------------------------------------------------------------------------------------------------|--------------------------------------------------------------------------------------|
| 16 | Goldvaser H, et al. The Association between Angiotensin Receptor Blocker Usage and Breast Cancer Characteristics. <i>Oncology</i> . 2016;91(4):217-223.                                                                                                                      | Not relevant in the context of the use of thiazide diuretics and risk of skin cancer |
| 17 | Gómez-Acebo I, et al. The use of antihypertensive medication and the risk of breast cancer in a case-control study in a Spanish population: The MCC-Spain study. <i>PLoS ONE</i> . 2016;11(8).                                                                               | No outcomes of interest reported                                                     |
| 18 | Pottgard A, et al. Use of hydrochlorothiazide and risk of skin cancer. <i>Pharmacoepidemiol Drug Saf</i> . 2017;26 (Supplement 2):473.                                                                                                                                       | Duplicate data                                                                       |
| 19 | Sigaroudi A, et al. Comparison of hydrochlorothiazide and ramipril concentrations in simultaneous cerebrospinal fluid and blood serum samples. <i>Naunyn-Schmiedeberg's Archives of Pharmacology</i> . 2017;390 (Supplement 1):S9.                                           | Not relevant in the context of the use of thiazide diuretics and risk of skin cancer |
| 20 | Mazzilli S, et al. Effects of topical 0.8% piroxicam and 50+ sunscreen filters on actinic keratosis in hypertensive patients treated with or without photosensitizing diuretic drugs: an observational cohort study. <i>Clin Cosmet Investig Dermatol</i> . 2018;11:485-490. | Not relevant in the context of the use of thiazide diuretics and risk of skin cancer |
| 21 | Pedersen SA, et al. Hydrochlorothiazide use and risk of merkel cell carcinoma and malignant adnexal skin tumours. <i>Pharmacoepidemiol Drug Saf</i> . 2018;27:388-389.                                                                                                       | Duplicate data                                                                       |
| 22 | Schmutz JL, et al. Hydrochlorothiazide and skin cancer. <i>Ann Dermatol Venereol</i> . 2018;145(3):225-226.                                                                                                                                                                  | Opinion                                                                              |
| 23 | Schmutz JL, et al. Hydrochlorothiazide appears to increase risk of melanoma. <i>Annales de Dermatologie et de Venereologie</i> . 2018;145(10):643-644.                                                                                                                       | Opinion                                                                              |
| 24 | Crow LD, et al. Medications Associated with Increased Risk of Keratinocyte Carcinoma. <i>Dermatologic Clinics</i> . 2019;37(3):297.                                                                                                                                          | Review article                                                                       |
| 25 | Faconti L, et al. Hydrochlorothiazide and the risk of skin cancer. A scientific statement of the British and Irish Hypertension Society. <i>J Hum Hypertens</i> . 2019;33(4):257-258.                                                                                        | Commentary                                                                           |
| 26 | Geyer S, et al. Hydrochlorothiazide and nonmelanoma skin cancer. <i>Hautarzt</i> . 2019;70(2):148-149.                                                                                                                                                                       | Commentary                                                                           |
| 27 | Haberle M, et al. Hydrochlorothiazide for lowering the Blood Pressure: What is the Relevance of this Medication to the Management of Squamous Cell Carcinoma? <i>J Dtsch Dermatol Ges</i> . 2019;17:85-86.                                                                   | Not relevant in the context of the use of thiazide diuretics and risk of skin cancer |
| 28 | Kreutz R, et al. Reviewing the effects of thiazide and thiazide-like diuretics as photosensitizing drugs on the risk of skin cancer. <i>J Hypertens</i> 2019; 37(10): 1950-8.                                                                                                | Review article                                                                       |
| 29 | Morales DR. et al. Association between hydrochlorothiazide exposure and skin, lip and oral cancer: A series of population-based nested case-control studies. <i>Pharmacoepidemiol Drug Saf</i> . 2019;28 (Supplement 2):42-43.                                               | Duplicate data                                                                       |

## Appendix VI List of Excluded Articles (Continued)

|    | Article                                                                                                                                                                                                                                    | Reason for Exclusion                                                                 |
|----|--------------------------------------------------------------------------------------------------------------------------------------------------------------------------------------------------------------------------------------------|--------------------------------------------------------------------------------------|
| 30 | Olde Engberink RHG, et al. Hydrochlorothiazide and skin cancer. <i>Nederlands Tijdschrift voor Geneeskunde</i> . 2019;163(19).                                                                                                             | Review article                                                                       |
| 31 | Queen D, et al. Characteristics of non-melanoma skin cancers of the cutaneous perioral and vermilion lip treated by Mohs micrographic surgery. <i>J Eur Acad Dermatol Venereol</i> . 2019;33(2):305-311.                                   | Not relevant in the context of the use of thiazide diuretics and risk of skin cancer |
| 32 | Santala EEE, et al. Antihypertensive drugs and prostate cancer survival after radical prostatectomy in Finland-A nationwide cohort study. <i>Int J Cancer</i> . 2019;144(3):440-447.                                                       | No outcomes of interest reported                                                     |
| 33 | Sokol G, et al. Geriatric Skin Cancer and Concomitant Photosensitivity Drug Utilization. <i>J Geriatr Oncol</i> . 2019;10 (6 Supplement 1):S36-S37.                                                                                        | Not relevant in the context of the use of thiazide diuretics and risk of skin cancer |
| 34 | Van Der Heijden S, et al. Hydrochlorothiazide and skin cancer. Warning for discussion? <i>Geneesmiddelenbulletin</i> . 2019;53(3).                                                                                                         | Commentary                                                                           |
| 35 | Wenzel RR, et al. Antihypertensive therapy & cancer. <i>Journal Fur Hypertonie</i> . 2019;23(1):8-17.                                                                                                                                      | Review article                                                                       |
| 36 | Daniels B, et al. Risks of squamous cell carcinoma of the lip and cutaneous melanoma in older Australians using hydrochlorothiazide (HCTZ). <i>Pharmacoepidemiol Drug Saf</i> . 2020;29:37-38.                                             | Duplicate data                                                                       |
| 37 | Eworuke E, et al. Risk of non-melanoma skin cancer associated with hydrochlorothiazide-containing products in the United States. <i>Pharmacoepidemiol Drug Saf</i> . 2020;29:9-9.                                                          | Duplicate data                                                                       |
| 38 | Habel LA, et al. Hydrochlorothiazide and risk of melanoma subtypes. <i>Pharmacoepidemiol Drug Saf</i> . 2020;29:49-50.                                                                                                                     | Duplicate data                                                                       |
| 39 | Hofmann GA, et al. The frequency of photosensitizing drug dispensings in Austria and Germany: a correlation with their photosensitizing potential based on published literature. <i>J Eur Acad Dermatol Venereol</i> . 2020;34(3):589-600. | Not relevant in the context of the use of thiazide diuretics and risk of skin cancer |
| 40 | Humbert X, et al. Thiazides and nonmelanoma skin cancer: Is it a class effect? New York, New York: Elsevier B.V.; 2020. p. e25-e6.                                                                                                         | Letter to editor                                                                     |
| 41 | Knuutila JS, et al. Risk factors and prognosis for metastatic cutaneous squamous cell carcinoma: A cohort study. <i>Acta Derm Venereol</i> . 2020;100(16):1-9.                                                                             | Not relevant in the context of the use of thiazide diuretics and risk of skin cancer |
| 42 | Kristensen KB, et al. Use of antiepileptic drugs and risk of skin cancer: A nationwide case-control study. <i>J Am Acad Dermatol</i> . 2020;82(2):326-335.                                                                                 | Not relevant in the context of the use of thiazide diuretics and risk of skin cancer |
| 43 | Leon-Munoz LM, et al. Use of hydrochlorothiazide and risk of skin cancer in a large nested case-control study in Spain. <i>Pharmacoepidemiol Drug Saf</i> . 2020;29:573-573.                                                               | Duplicate data                                                                       |
| 44 | Letellier T, et al. Hydrochlorothiazide exposure increases the risk of long-term squamous cell carcinoma after kidney transplantation. <i>Transplant International</i> . 2020;33 (Supplement 1):6-7.                                       | Duplicate data                                                                       |

## Appendix VI List of Excluded Articles (Continued)

|    | Article                                                                                                                                                                                                                                                                                             | Reason for Exclusion                                                                 |
|----|-----------------------------------------------------------------------------------------------------------------------------------------------------------------------------------------------------------------------------------------------------------------------------------------------------|--------------------------------------------------------------------------------------|
| 45 | Mazzilli S, et al. Efficacy of topical piroxicam 0.8% and sunscreen 50+ on actinic keratosis lesions in hypertensive subjects with or without thiazides diuretic treatments. Journal of the Dermatology Nurses' Association Conference: 24th World Congress of Dermatology Milan Italy 2020; 12(2). | Not relevant in the context of the use of thiazide diuretics and risk of skin cancer |
| 46 | Oh CC, et al. Coffee, tea, caffeine, and risk of non melanoma skin cancer in a chinese population: the singapore chinese health study. Journal of the Dermatology Nurses' Association Conference: 24th World Congress of Dermatology Milan Italy 2020; 12(2).                                       | Not relevant in the context of the use of thiazide diuretics and risk of skin cancer |
| 47 | O'Neill B, et al. Hydrochlorothiazide and squamous cell carcinoma. Canadian Family Physician 2020; 66(2): 116.                                                                                                                                                                                      | Opinion                                                                              |
| 48 | Pease DR, et al. Cutaneous T-cell lymphoma after chronic exposure to hydrochlorothiazide: pharmacovigilance analysis from the RADAR (Research on Adverse Drug events And Reports) Program. J Eur Acad Dermatol Venereol. 2020.                                                                      | Letter to editor                                                                     |
| 49 | Pottegard A, et al. Use of hydrochlorothiazide in Denmark following publication of skin cancer risk findings. Pharmacoepidemiol Drug Saf. 2020;29:141-141.                                                                                                                                          | Not relevant in the context of the use of thiazide diuretics and risk of skin cancer |
| 50 | Pottegard A, et al. Use of hydrochlorothiazide and risk of uveal melanoma. Pharmacoepidemiol Drug Saf. 2020;29:573-573.                                                                                                                                                                             | No outcomes of interest reported                                                     |
| 51 | Rouette J, et al. Use of hydrochlorothiazide and risk of melanoma and nonmelanoma skin cancer. Pharmacoepidemiol Drug Saf. 2020;29:570-570.                                                                                                                                                         | Duplicate data                                                                       |
| 52 | Schneider R, et al. Risk of skin cancer in new users of thiazides and thiazide-like diuretics: A cohort study using an active comparator group. Pharmacoepidemiol Drug Saf. 2020;29:568-568.                                                                                                        | Duplicate data                                                                       |
| 53 | Schulz M, et al. Impact on antihypertensive prescribing after the dear healthcare professional letter on increased risk of skin cancer related to hydrochlorothiazide. Value Health. 2020;23:S102-S102.                                                                                             | Not relevant in the context of the use of thiazide diuretics and risk of skin cancer |
| 54 | Tironneau S, et al. Increased risk of skin cancer with hydrochlorothiazide: What are the practical consequences? Prescrire Int. 2020;29(217):186-187.                                                                                                                                               | Review article                                                                       |
| 55 | Warszawik-Hendzel O, et al. Cardiovascular Drug Use and Risk of Actinic Keratosis: A Case-Control Study. Dermatol Ther (Heidelb). 2020;10(4):735-743.                                                                                                                                               | Unadjusted effect estimates                                                          |
| 56 | Copland E, et al. Antihypertensive treatment and risk of cancer: an individual participant data meta-analysis. Lancet Oncol. 2021;22(4):558-570.                                                                                                                                                    | Insufficient data                                                                    |
| 57 | Lecaros-Astorga, et al. Hydrochlorothiazide use and risk of non-melanoma skin cancer in Spain: A case/non-case study. Int J Clin Pharmacol ther. 2021;59(4):280-8.                                                                                                                                  | Unadjusted effect estimates                                                          |
| 58 | Rodríguez-Jiménez P, et al. RF - Thiazide Diuretics and Nonmelanoma Skin Cancer. Actas Dermo-Sifiliograficas 2021; 112(2): 176-7.                                                                                                                                                                   | Opinion                                                                              |
